# Supplementary material for: Challenges in data-driven catalysis modelling: case study on palladium-NHC catalyzed Suzuki–Miyaura reactions
Source: Royal Society of Chemistry journal article supplement (doi:10.1039/d5sc06138e), 2026-01-01
Supplement: d5sc06138e2.zip [file brute_force_comparison.xlsx]

## Sheet: original
feats	set	R2train	R2LOO	R2test	MAEtrain	MAEtest	MAELOO	condition
['%V_Bur_2_4.0_False_max_ligand (0)', ' anisotropy TPSS_TZVP_COSMO_avg_trans_pdcl2_sme2 (1)**2']	original	0.655316	-1.31809	0.408994	12.364	18.0565	16.74	all
['MAX_L_3_8_1_7_3.5_False_avg_trans_pd (0)', ' sigma_4_min_ligand (0)**2']	original	0.905887	0.285386	-0.656926	5.28592	38.0888	8.11028	Yield_EtOH_K2CO3
[' sigma_5_max_ligand (0)**2', 'DDG (kcal) trans_sme2_to_trans_sme2_2methf (0)**2']	original	0.750138	-0.22409	-0.0859082	8.63599	27.9158	12.1301	Yield_EtOH_K3PO4
[' anisotropy TPSS_TZVP_COSMO_avg_trans_pdcl2 (1)', ' shield(4&5) TPSS_TZVP_COSMO_avg_delta_cis_pdcl2_sme2-ligand (0)**2']	original	0.783331	0.417623	0.441849	10.3463	15.3223	9.55536	Yield_Me-THF_Cs2CO3
[' shield(6) TPSS_TZVP_COSMO_avg_cis_pdcl2_sme2 (0)', 'MIN_Bmin_11_1_11_32_3.5_False_avg_trans_pdcl2_s (0)']	original	0.908291	0.550497	0.254452	7.37801	26.3626	9.29909	Yield_Me-THF_K3PO4
[' shield(MAX4&5) TPSS_TZVP_COSMO_max_delta_trans_pdcl2_sme2-ligand (0)', ' dist1-2& dist2-3_avg_delta_min_pdcl2_sme2-ligand (0)**2']	original	0.869906	0.564841	0.919189	8.33254	8.66432	10.734	Yield_Toluene_Cs2CO3
[' HOMO TPSS_TZVP_COSMO_avg_ligand (1)', 'L_5_4_3.5_True_min_cis_pdcl2_s (0)**2']	original	0.56477	-0.942943	0.482499	10.4548	20.6949	12.3841	Yield_iPrOAc_Cs2CO3
['%V_Bur_6_3.5_False_avg_trans_pd_sme2 (0)', 'MIN_Bmin_11_1_11_32_3.5_False_avg_trans_pdcl2_s (0)**2']	original	0.853013	0.758626	-0.802004	7.59239	36.9786	8.26181	Yield_iPrOAc_K3PO4

## Sheet: random3_2
feats	set	R2train	R2LOO	R2test	MAEtrain	MAEtest	MAELOO	condition
['MAX_L_1_5_3_4_3.5_False_avg_cis_pd_sme2 (0)', '%V_Bur_2_4.0_False_max_ligand (0)']	random3_2	0.678045	-1.1652	-0.22243	10.6912	35.9297	12.8702	all
[' sigma_4_min_ligand (0)**2', 'Bmax_13_6_3.5_False_avg_cis_pd_sme2 (1)**2']	random3_2	0.865076	0.0472766	-2.9436	6.36343	42.9518	7.70815	Yield_EtOH_K2CO3
['%V_Bur_2_3.5_False_max_lig_from_trans (0)', '%V_Bur_2_3.5_False_max_lig_from_trans (0)**2']	random3_2	0.919517	0.597129	-0.106536	5.07317	19.4314	6.36902	Yield_EtOH_K3PO4
['MIN_Bmin_7_4_8_5_3.5_True_min_trans_pdcl2_s (0)', ' tors2-1-9-22& tors2-1-9-23_avg_cis_pdcl2_sme2 (0)**2']	random3_2	0.849483	0.592222	-0.238539	8.30318	26.5129	8.64647	Yield_Me-THF_Cs2CO3
[' shield(MIN4&5) TPSS_TZVP_COSMO_min_delta_trans_pdcl2_sme2-ligand (0)', 'MAX_L_4_1_5_31_3.5_False_min_trans_pdcl2_s (0)**2']	random3_2	0.781392	0.647798	-0.802501	7.65137	49.5986	8.01273	Yield_Me-THF_K3PO4
[' shield(6) TPSS_TZVP_COSMO_min_trans_pdcl2 (1)**2', '%V_Bur_2_3.5_False_min_ligand (0)**2']	random3_2	0.813253	0.672599	-0.255942	8.06472	24.0615	9.27832	Yield_Toluene_Cs2CO3
['%V_Bur_2_4.0_False_max_ligand (0)', 'L_2_6_3.5_False_avg_trans_pd_sme2 (0)**2']	random3_2	0.848226	-0.608436	-0.490933	5.81396	37.3221	8.43779	Yield_iPrOAc_Cs2CO3
['MAX_L_8_1_7_31_3.5_False_max_trans_pd_sme2 (0)**2', '%V_Bur_6_3.5_False_avg_trans_pd_sme2 (0)**2']	random3_2	0.82924	0.707484	-0.240432	7.40361	34.5091	8.55345	Yield_iPrOAc_K3PO4

## Sheet: random5_1
feats	set	R2train	R2LOO	R2test	MAEtrain	MAEtest	MAELOO	condition
[' anisotropy TPSS_TZVP_COSMO_avg_trans_pdcl2_sme2 (1)**2', '%V_Bur_2_4.0_False_max_ligand (0)**2']	random5_1	0.755454	0.250784	0.230991	10.5137	25.2514	12.65	all
['Bmax_13_6_3.5_False_avg_cis_pd_sme2 (1)', ' sigma_4_min_ligand (0)**2']	random5_1	0.897019	0.725031	-0.915937	6.99342	33.5884	8.7608	Yield_EtOH_K2CO3
['MAX_L_1_4_3_5_3.5_False_min_ligand (0)**2', 'L_5_4_3.5_True_max_cis_pd_sme2 (0)**2']	random5_1	0.862115	0.767875	-0.598612	7.59793	40.1496	8.14131	Yield_EtOH_K3PO4
[' IBO(10) TPSS_TZVP_COSMO_avg_cis_pdcl2_sme2 (1)**2', 'L_1_3_3.5_False_avg_cis_pd_sme2 (0)**2']	random5_1	0.933226	0.793378	-0.61105	6.39849	33.9673	8.77305	Yield_Me-THF_Cs2CO3
[' dipole_z_avg_ligand (0)**2', ' shield(4&5) TPSS_TZVP_COSMO_avg_delta_cis_pdcl2_sme2-ligand (0)**2']	random5_1	0.959113	0.877072	-0.588908	5.63526	30.3689	7.70377	Yield_Me-THF_K3PO4
[' IBO(2) TPSS_TZVP_COSMO_avg_delta_cis_pdcl2_sme2-ligand (0)**2', ' dist3-10& dist1-9_min_delta_cis_pdcl2_sme2-trans_pdcl2_sme2 (0)**2']	random5_1	0.950812	0.862743	-0.696139	5.34953	38.8774	6.34728	Yield_Toluene_Cs2CO3
[' H_acceptor_avg_cis_pdcl2_sme2 (1)**2', ' LUMO TPSS_TZVP_COSMO_avg_ligand (1)**2']	random5_1	0.949452	0.0206452	-1.90315	4.86997	28.5465	7.15436	Yield_iPrOAc_Cs2CO3
[' IBO(11) TPSS_TZVP_COSMO_avg_cis_pdcl2_sme2 (1)', 'MIN_Bmin_11_1_11_32_3.5_False_avg_trans_pdcl2_s (0)**2']	random5_1	0.841642	0.707908	-2.01597	8.50199	41.8493	9.40689	Yield_iPrOAc_K3PO4

## Sheet: random5_2
feats	set	R2train	R2LOO	R2test	MAEtrain	MAEtest	MAELOO	condition
[' NBO(MIN1&3) TPSS_TZVP_COSMO_max_delta_cis_pdcl2_sme2-ligand (1)', '%V_Bur_3_3.5_False_avg_cis_pd_sme2 (0)**2']	random5_2	0.675308	-0.50447	-2.8216	9.45162	46.5212	12.5999	all
['MAX_L_3_12_1_13_3.5_False_avg_cis_pd_sme2 (0)**2', 'MAX_L_1_11_3_11_3.5_False_min_trans_pd_sme2 (0)**2']	random5_2	0.99231	0.715624	-2.15979	1.52408	45.7578	4.10152	Yield_EtOH_K2CO3
[' IBO(MIN4&5) TPSS_TZVP_COSMO_min_delta_cis_pdcl2_sme2-trans_pdcl2_sme2 (1)', ' anisotropy TPSS_TZVP_COSMO_avg_ligand (1)**2']	random5_2	0.922485	0.774917	-2.98428	4.32212	51.8566	5.96373	Yield_EtOH_K3PO4
[' anisotropy TPSS_TZVP_COSMO_avg_trans_pdcl2_sme2 (1)', ' shield(MIN1&3) TPSS_TZVP_COSMO_min_delta_cis_pdcl2_sme2-ligand (0)**2']	random5_2	0.783557	0.747901	-1.35885	8.51595	31.2855	8.32959	Yield_Me-THF_Cs2CO3
[' IBO(1&3) TPSS_TZVP_COSMO_max_delta_cis_pdcl2_sme2-trans_pdcl2_sme2 (1)', ' tors2-1-9-22& tors2-1-9-23_avg_cis_pdcl2_sme2 (0)**2']	random5_2	0.917714	0.79525	0.848927	7.11565	9.98878	8.25354	Yield_Me-THF_K3PO4
[' shield(MAX4&5) TPSS_TZVP_COSMO_max_delta_trans_pdcl2_sme2-ligand (0)', ' dist1-2& dist2-3_avg_delta_min_pdcl2_sme2-ligand (0)']	random5_2	0.915325	0.685922	0.61084	5.68792	14.6224	7.54997	Yield_Toluene_Cs2CO3
[' HOMO TPSS_TZVP_COSMO_avg_cis_pdcl2_sme2 (0)', ' dipole_y_avg_cis_pdcl2_sme2 (0)**2']	random5_2	0.761164	-1.00704	0.575585	7.56366	17.3261	9.82142	Yield_iPrOAc_Cs2CO3
['MAX_L_4_1_5_33_3.5_False_min_trans_pdcl2_s (0)', 'Bmin_4_5_3.5_False_min_ligand (2)**2']	random5_2	0.789027	0.566147	-2.15786	9.26462	48.6598	10.6985	Yield_iPrOAc_K3PO4
