# Supplementary material for: Challenges in data-driven catalysis modelling: case study on palladium-NHC catalyzed Suzuki–Miyaura reactions
Source: Royal Society of Chemistry journal article supplement (doi:10.1039/d5sc06138e), 2026-01-01
Supplement: d5sc06138e2.zip [file catalysts.xlsx]

## Sheet: Sheet1
FullName	Name	SMILES	Core	SMILES Core	R	SMILES R	SMILES_noPd
IPr-Pd-DMS	IPr	C1N(c2c(C(C)C)cccc2C(C)C)C=CN1c3c(C(C)C)cccc3C(C)C	1	CN1/C(N(C)C=C1)=[Pd](Cl)/Cl	R1	c1c(C(C)C)cccc1C(C)C	[C]1N(c2c(C(C)C)cccc2C(C)C)C=CN1c3c(C(C)C)cccc3C(C)C
SIPr-Pd-DMS	SIPr	C1N(c2c(C(C)C)cccc2C(C)C)CCN1c3c(C(C)C)cccc3C(C)C	2	CN1/C(N(C)CC1)=[Pd](Cl)/Cl	R1	c1c(C(C)C)cccc1C(C)C	[C]1N(c2c(C(C)C)cccc2C(C)C)CCN1c3c(C(C)C)cccc3C(C)C
IMes-Pd-DMS	IMes	Cc1c(N2CN(c3c(C)cc(C)cc3C)C=C2)c(C)cc(C)c1	1	CN1/C(N(C)C=C1)=[Pd](Cl)/Cl	R2	Cc1cc(C)cc(C)c1	Cc1c(N2[C]N(c3c(C)cc(C)cc3C)C=C2)c(C)cc(C)c1
SIMes-Pd-DMS	SIMes	Cc1c(N2CN(c3c(C)cc(C)cc3C)CC2)c(C)cc(C)c1	2	CN1/C(N(C)CC1)=[Pd](Cl)/Cl	R2	Cc1cc(C)cc(C)c1	Cc1c(N2[C]N(c3c(C)cc(C)cc3C)CC2)c(C)cc(C)c1
IDD-Pd-DMS	IDD	C1N(C2CCCCCCCCCCC2)C=CN1C3CCCCCCCCCCC3	1	CN1/C(N(C)C=C1)=[Pd](Cl)/Cl	R3	C1CCCCCCCCCCC1	[C]1N(C2CCCCCCCCCCC2)C=CN1C3CCCCCCCCCCC3
SIDD-Pd-DMS	SIDD	C1N(C2CCCCCCCCCCC2)CCN1C3CCCCCCCCCCC3	2	CN1/C(N(C)CC1)=[Pd](Cl)/Cl	R3	C1CCCCCCCCCCC1	[C]1N(C2CCCCCCCCCCC2)CCN1C3CCCCCCCCCCC3
IPr*-Pd-DMS	IPr*	Cc1cc(C(C2=CC=CC=C2)C3=CC=CC=C3)c(N4C=CN(c5c(C(C6=CC=CC=C6)C7=CC=CC=C7)cc(C)cc5C(C8=CC=CC=C8)C9=CC=CC=C9)C4)c(C(C%10=CC=CC=C%10)C%11=CC=CC=C%11)c1	1	CN1/C(N(C)C=C1)=[Pd](Cl)/Cl	R4	c1c(C(C2=CC=CC=C2)C3=CC=CC=C3)cc(C)cc1C(C4=CC=CC=C4)C5=CC=CC=C5	Cc1cc(C(C2=CC=CC=C2)C3=CC=CC=C3)c(N4C=CN(c5c(C(C6=CC=CC=C6)C7=CC=CC=C7)cc(C)cc5C(C8=CC=CC=C8)C9=CC=CC=C9)[C]4)c(C(C%10=CC=CC=C%10)C%11=CC=CC=C%11)c1
IPr*OMe-Pd-DMS	IPr*OMe	C1N(c2c(C(C3=CC=CC=C3)C4=CC=CC=C4)cc(OC)cc2C(C5=CC=CC=C5)C6=CC=CC=C6)C=CN1c7c(C(C8=CC=CC=C8)C9=CC=CC=C9)cc(OC)cc7C(C%10=CC=CC=C%10)C%11=CC=CC=C%11	1	CN1/C(N(C)C=C1)=[Pd](Cl)/Cl	R5	c1c(C(C2=CC=CC=C2)C3=CC=CC=C3)cc(OC)cc1C(C4=CC=CC=C4)C5=CC=CC=C5	[C]1N(c2c(C(C3=CC=CC=C3)C4=CC=CC=C4)cc(OC)cc2C(C5=CC=CC=C5)C6=CC=CC=C6)C=CN1c7c(C(C8=CC=CC=C8)C9=CC=CC=C9)cc(OC)cc7C(C%10=CC=CC=C%10)C%11=CC=CC=C%11
IPr#-Pd-DMS	IPr#	C1N(c2c(C(C3=CC=CC=C3)C4=CC=CC=C4)cc(C(C5=CC=CC=C5)C6=CC=CC=C6)cc2C(C7=CC=CC=C7)C8=CC=CC=C8)C=CN1c9c(C(C%10=CC=CC=C%10)C%11=CC=CC=C%11)cc(C(C%12=CC=CC=C%12)C%13=CC=CC=C%13)cc9C(C%14=CC=CC=C%14)C%15=CC=CC=C%15	1	CN1/C(N(C)C=C1)=[Pd](Cl)/Cl	R6	c1c(C(C2=CC=CC=C2)C3=CC=CC=C3)cc(C(C4=CC=CC=C4)C5=CC=CC=C5)cc1C(C6=CC=CC=C6)C7=CC=CC=C7	[C]1N(c2c(C(C3=CC=CC=C3)C4=CC=CC=C4)cc(C(C5=CC=CC=C5)C6=CC=CC=C6)cc2C(C7=CC=CC=C7)C8=CC=CC=C8)C=CN1c9c(C(C%10=CC=CC=C%10)C%11=CC=CC=C%11)cc(C(C%12=CC=CC=C%12)C%13=CC=CC=C%13)cc9C(C%14=CC=CC=C%14)C%15=CC=CC=C%15
BIAN-IMes-Pd-DMS	BIAN-IMes	Cc1c(N2C3=C(C4=C5C3=CC=CC5=CC=C4)N(c6c(C)cc(C)cc6C)C2)c(C)cc(C)c1	3	CN(/C(N1C)=[Pd](Cl)/Cl)C2=C1C3=C4C2=CC=CC4=CC=C3	R2	Cc1cc(C)cc(C)c1	Cc1c(N2C3=C(C4=C5C3=CC=CC5=CC=C4)N(c6c(C)cc(C)cc6C)[C]2)c(C)cc(C)c1
BIAN-IPr-Pd-DMS	BIAN-IPr	C1N(c2c(C(C)C)cccc2C(C)C)C3=C(C4=C5C3=CC=CC5=CC=C4)N1c6c(C(C)C)cccc6C(C)C	3	CN(/C(N1C)=[Pd](Cl)/Cl)C2=C1C3=C4C2=CC=CC4=CC=C3	R1	c1c(C(C)C)cccc1C(C)C	[C]1N(c2c(C(C)C)cccc2C(C)C)C3=C(C4=C5C3=CC=CC5=CC=C4)N1c6c(C(C)C)cccc6C(C)C
BIAN-IPr#-Pd-DMS	BIAN-IPr#	C1N(c2c(C(C3=CC=CC=C3)C4=CC=CC=C4)cc(C(C5=CC=CC=C5)C6=CC=CC=C6)cc2C(C7=CC=CC=C7)C8=CC=CC=C8)C9=C(C%10=C%11C9=CC=CC%11=CC=C%10)N1c%12c(C(C%13=CC=CC=C%13)C%14=CC=CC=C%14)cc(C(C%15=CC=CC=C%15)C%16=CC=CC=C%16)cc%12C(C%17=CC=CC=C%17)C%18=CC=CC=C%18	3	CN(/C(N1C)=[Pd](Cl)/Cl)C2=C1C3=C4C2=CC=CC4=CC=C3	R6	c1c(C(C2=CC=CC=C2)C3=CC=CC=C3)cc(C(C4=CC=CC=C4)C5=CC=CC=C5)cc1C(C6=CC=CC=C6)C7=CC=CC=C7	[C]1N(c2c(C(C3=CC=CC=C3)C4=CC=CC=C4)cc(C(C5=CC=CC=C5)C6=CC=CC=C6)cc2C(C7=CC=CC=C7)C8=CC=CC=C8)C9=C(C%10=C%11C9=CC=CC%11=CC=C%10)N1c%12c(C(C%13=CC=CC=C%13)C%14=CC=CC=C%14)cc(C(C%15=CC=CC=C%15)C%16=CC=CC=C%16)cc%12C(C%17=CC=CC=C%17)C%18=CC=CC=C%18
IPrCl-Pd-DMS	IPrCl	C1N(c2c(C(C)C)cccc2C(C)C)C(Cl)=C(Cl)N1c3c(C(C)C)cccc3C(C)C	4	CN1/C(N(C)C(Cl)=C1Cl)=[Pd](Cl)/Cl	R1	c1c(C(C)C)cccc1C(C)C	[C]1N(c2c(C(C)C)cccc2C(C)C)C(Cl)=C(Cl)N1c3c(C(C)C)cccc3C(C)C
IPentCl-Pd-DMS	IPentCl	CCC(CC)C1=CC=CC(C(CC)CC)=C1N2CN(C3=C(C(CC)CC)C=CC=C3C(CC)CC)C(Cl)=C2Cl	4	CN1/C(N(C)C(Cl)=C1Cl)=[Pd](Cl)/Cl	R7	CCC(CC)C1=CC=CC(C(CC)CC)=C1	CCC(CC)C1=CC=CC(C(CC)CC)=C1N2[C]N(C3=C(C(CC)CC)C=CC=C3C(CC)CC)C(Cl)=C2Cl
INonCl-Pd-DMS	INonCl	ClC1=C(Cl)N(C2=C(C(CCCC)CCCC)C=CC=C2C(CCCC)CCCC)CN1C3=C(C(CCCC)CCCC)C=CC=C3C(CCCC)CCCC	4	CN1/C(N(C)C(Cl)=C1Cl)=[Pd](Cl)/Cl	R8	CCCCC(CCCC)C1=CC=CC(C(CCCC)CCCC)=C1	ClC1=C(Cl)N(C2=C(C(CCCC)CCCC)C=CC=C2C(CCCC)CCCC)[C]N1C3=C(C(CCCC)CCCC)C=CC=C3C(CCCC)CCCC
IPriPr-Pd-DMS	IPriPr	C1N(C=CN1c2c(C(C)C)cc(C(C)C)cc2C(C)C)c3c(C(C)C)cc(C(C)C)cc3C(C)C	1	CN1/C(N(C)C=C1)=[Pd](Cl)/Cl	R9	CC(C)c1cc(C(C)C)ccc1	[C]1N(c2c(C(C)C)cccc2C(C)C)C=CN1c3c(C(C)C)cccc3C(C)C
IPaul-Pd-DMS	IPaul	Cc1cc(C)cc(C(C2=CC=CC=C2)C3=CC=CC=C3)c1N(C4)C=CN4c5c(C)cc(C)cc5C(C6=CC=CC=C6)C7=CC=CC=C7	1	CN1/C(N(C)C=C1)=[Pd](Cl)/Cl	R10	Cc1c(C)c(C(C2=CC=CC=C2)C3=CC=CC=C3)cc(C)c1	Cc1c(N2C=CN(c3c(C(C4=CC=CC=C4)C5=CC=CC=C5)cc(C)cc3C)C2)c(C(C6=CC=CC=C6)C7=CC=CC=C7)cc(C)c1
IPr*Tol-Pd-DMS	IPr*Tol	C1N(C2=C(C(C3=CC=C(C)C=C3)C4=CC=C(C)C=C4)C=C(C)C=C2C(C5=CC=C(C)C=C5)C6=CC=C(C)C=C6)C=CN1C7=C(C(C8=CC=C(C)C=C8)C9=CC=C(C)C=C9)C=C(C)C=C7C(C%10=CC=C(C)C=C%10)C%11=CC=C(C)C=C%11	1	CN1/C(N(C)C=C1)=[Pd](Cl)/Cl	R12	[CC1=CC=CC=C1]C([CC1=CC=CC=C1])c1c(C)c(C([CC1=CC=CC=C1])[CC1=CC=CC=C1])cc(C)c1	[CC1=CC=CC=C1]C([CC1=CC=CC=C1])c1c(N2C=CN(c3c(C([CC1=CC=CC=C1])[CC1=CC=CC=C1])cc(C)cc3C([CC1=CC=CC=C1])[CC1=CC=CC=C1])C2)c(C([CC1=CC=CC=C1])[CC1=CC=CC=C1])cc(C)c1
IPent-Pd-DMS	IPent	CCC(CC)C1=CC=CC(C(CC)CC)=C1N2CN(C3=C(C(CC)CC)C=CC=C3C(CC)CC)C=C2	1	CN1/C(N(C)C=C1)=[Pd](Cl)/Cl	R7	CCC(CC)C1=CC=CC(C(CC)CC)=C1	CCC(CC)C1=CC=CC(C(CC)CC)=C1N2[C]N(C3=C(C(CC)CC)C=CC=C3C(CC)CC)C=C2
IHept-Pd-DMS	IHept	C1N(C=CN1C2=C(C=CC=C2C(CCC)CCC)C(CCC)CCC)C3=C(C=CC=C3C(CCC)CCC)C(CCC)CCC	1	CN1/C(N(C)C=C1)=[Pd](Cl)/Cl	R11	CC1=C(C(CCC)CCC)C=CC=C1C(CCC)CCC	CCCC(CCC)C(C=CC=C1C(CCC)CCC)=C1N2C=CN(C3=C(C=CC=C3C(CCC)CCC)C(CCC)CCC)C2
IHeptCl-Pd-DMS	IHeptCl	C1N(C2=C(C(CCC)CCC)C=CC=C2C(CCC)CCC)C(Cl)=C(Cl)N1C3=C(C(CCC)CCC)C=CC=C3C(CCC)CCC	4	CN1/C(N(C)C(Cl)=C1Cl)=[Pd](Cl)/Cl	R11	CC1=C(C(CCC)CCC)C=CC=C1C(CCC)CCC	ClC1=C(Cl)N(C2=C(C(CCC)CCC)C=CC=C2C(CCC)CCC)CN1C3=C(C(CCC)CCC)C=CC=C3C(CCC)CCC
