# Supplementary material for: Challenges in data-driven catalysis modelling: case study on palladium-NHC catalyzed Suzuki–Miyaura reactions
Source: Royal Society of Chemistry journal article supplement (doi:10.1039/d5sc06138e), 2026-01-01
Supplement: d5sc06138e2.zip [file dehalogenation.xlsx]

## Sheet: VL 890_891
Catalyst	Solvent	Base	Yield	Plate
IMes-Pd-DMS	EtOH	Cs2CO3	3	VL 890
IPent-Pd-DMS	EtOH	K2CO3	3	VL 890
IPr-Pd-DMS	EtOH	K2CO3	2	VL 890
SIPr-Pd-DMS	EtOH	K2CO3	2	VL 890
IPr-Pd-DMS	EtOH	K3PO4	2	VL 890
IPent-Pd-DMS	EtOH	K2CO3	2	VL 891
IHept-Pd-DMS	EtOH	K2CO3	3	VL 891
IPr*Tol-Pd-DMS	EtOH	K2CO3	25	VL 891
IHeptCl-Pd-DMS	EtOH	K2CO3	12	VL 891
IPaul-Pd-DMS	EtOH	K2CO3	4	VL 891
IMes-Pd-DMS	EtOH	Cs2CO3	3	VL 890
IPent-Pd-DMS	EtOH	K2CO3	3	VL 890
IPr-Pd-DMS	EtOH	K2CO3	2	VL 890
SIPr-Pd-DMS	EtOH	K2CO3	2	VL 890
IPr-Pd-DMS	EtOH	K3PO4	2	VL 890
IPent-Pd-DMS	EtOH	K2CO3	2	VL 891
IHept-Pd-DMS	EtOH	K2CO3	3	VL 891
IPr*Tol-Pd-DMS	EtOH	K2CO3	11	VL 891
IHeptCl-Pd-DMS	EtOH	K2CO3	10	VL 891
IPaul-Pd-DMS	EtOH	K2CO3	3	VL 891
IPent-Pd-DMS	EtOH	K2CO3	3	VL 884
IHept-Pd-DMS	EtOH	K2CO3	2	VL 884
IPr*Tol-Pd-DMS	EtOH	K2CO3	10	VL 884
IHeptCl-Pd-DMS	EtOH	K2CO3	10	VL 884
IPaul-Pd-DMS	EtOH	K2CO3	3	VL 884
IPent-Pd-DMS	EtOH	Cs2CO3	17	VL 884
IHept-Pd-DMS	EtOH	Cs2CO3	18	VL 884
IPr*Tol-Pd-DMS	EtOH	Cs2CO3	24	VL 884
IHeptCl-Pd-DMS	EtOH	Cs2CO3	45	VL 884
IPaul-Pd-DMS	EtOH	Cs2CO3	2	VL 884
IPent-Pd-DMS	EtOH	K3PO4	3	VL 884
IHept-Pd-DMS	EtOH	K3PO4	3	VL 884
IPr*Tol-Pd-DMS	EtOH	K3PO4	18	VL 884
IHeptCl-Pd-DMS	EtOH	K3PO4	2	VL 884
IPaul-Pd-DMS	EtOH	K3PO4	3	VL 884
IPent-Pd-DMS	EtOH	K2CO3	0	VL 883
IHept-Pd-DMS	EtOH	K2CO3	2	VL 883
IPr*Tol-Pd-DMS	EtOH	K2CO3	11	VL 883
IHeptCl-Pd-DMS	EtOH	K2CO3	9	VL 883
IPaul-Pd-DMS	EtOH	K2CO3	3	VL 883
IPent-Pd-DMS	EtOH	Cs2CO3	16	VL 883
IHept-Pd-DMS	EtOH	Cs2CO3	18	VL 883
IPr*Tol-Pd-DMS	EtOH	Cs2CO3	18	VL 883
IHeptCl-Pd-DMS	EtOH	Cs2CO3	35	VL 883
IPaul-Pd-DMS	EtOH	Cs2CO3	2	VL 883
IPent-Pd-DMS	EtOH	K3PO4	0	VL 883
IHept-Pd-DMS	EtOH	K3PO4	3	VL 883
IPr*Tol-Pd-DMS	EtOH	K3PO4	2	VL 883
IHeptCl-Pd-DMS	EtOH	K3PO4	2	VL 883
IPaul-Pd-DMS	EtOH	K3PO4	3	VL 883
IPr#-Pd-DMS	EtOH	K2CO3	19	VL 827
BIAN-IMes-Pd-DMS	EtOH	K2CO3	3	VL 827
BIAN-IPr-Pd-DMS	EtOH	K2CO3	3	VL 827
BIAN-IPr#-Pd-DMS	EtOH	K2CO3	10	VL 827
IPrCl-Pd-DMS	EtOH	K2CO3	2	VL 827
IPentCl-Pd-DMS	EtOH	K2CO3	6	VL 827
INonCl-Pd-DMS	EtOH	K2CO3	12	VL 827
IPriPr-Pd-DMS	EtOH	K2CO3	2	VL 827
IPr#-Pd-DMS	EtOH	Cs2CO3	53	VL 827
BIAN-IMes-Pd-DMS	EtOH	Cs2CO3	2	VL 827
BIAN-IPr-Pd-DMS	EtOH	Cs2CO3	2	VL 827
BIAN-IPr#-Pd-DMS	EtOH	Cs2CO3	8	VL 827
IPrCl-Pd-DMS	EtOH	Cs2CO3	14	VL 827
IPentCl-Pd-DMS	EtOH	Cs2CO3	67	VL 827
INonCl-Pd-DMS	EtOH	Cs2CO3	72	VL 827
IPriPr-Pd-DMS	EtOH	Cs2CO3	7	VL 827
IPr#-Pd-DMS	EtOH	K3PO4	66	VL 827
BIAN-IMes-Pd-DMS	EtOH	K3PO4	2	VL 827
BIAN-IPr-Pd-DMS	EtOH	K3PO4	2	VL 827
BIAN-IPr#-Pd-DMS	EtOH	K3PO4	47	VL 827
IPrCl-Pd-DMS	EtOH	K3PO4	7	VL 827
IPentCl-Pd-DMS	EtOH	K3PO4	24	VL 827
INonCl-Pd-DMS	EtOH	K3PO4	26	VL 827
IPriPr-Pd-DMS	EtOH	K3PO4	0	VL 827
IPr#-Pd-DMS	EtOH	K2CO3	27	VL 828
BIAN-IMes-Pd-DMS	EtOH	K2CO3	3	VL 828
BIAN-IPr-Pd-DMS	EtOH	K2CO3	3	VL 828
BIAN-IPr#-Pd-DMS	EtOH	K2CO3	13	VL 828
IPrCl-Pd-DMS	EtOH	K2CO3	2	VL 828
IPentCl-Pd-DMS	EtOH	K2CO3	7	VL 828
INonCl-Pd-DMS	EtOH	K2CO3	9	VL 828
IPriPr-Pd-DMS	EtOH	K2CO3	2	VL 828
IPr#-Pd-DMS	EtOH	Cs2CO3	46	VL 828
BIAN-IMes-Pd-DMS	EtOH	Cs2CO3	2	VL 828
BIAN-IPr-Pd-DMS	EtOH	Cs2CO3	3	VL 828
BIAN-IPr#-Pd-DMS	EtOH	Cs2CO3	8	VL 828
IPrCl-Pd-DMS	EtOH	Cs2CO3	14	VL 828
IPentCl-Pd-DMS	EtOH	Cs2CO3	66	VL 828
INonCl-Pd-DMS	EtOH	Cs2CO3	55	VL 828
IPriPr-Pd-DMS	EtOH	Cs2CO3	8	VL 828
IPr#-Pd-DMS	EtOH	K3PO4	64	VL 828
BIAN-IMes-Pd-DMS	EtOH	K3PO4	4	VL 828
BIAN-IPr-Pd-DMS	EtOH	K3PO4	2	VL 828
BIAN-IPr#-Pd-DMS	EtOH	K3PO4	56	VL 828
IPrCl-Pd-DMS	EtOH	K3PO4	6	VL 828
IPentCl-Pd-DMS	EtOH	K3PO4	23	VL 828
INonCl-Pd-DMS	EtOH	K3PO4	24	VL 828
IPriPr-Pd-DMS	EtOH	K3PO4	0	VL 828
IPr-Pd-DMS	EtOH	K2CO3	2	VL 826
SIPr-Pd-DMS	EtOH	K2CO3	2	VL 826
IMes-Pd-DMS	EtOH	K2CO3	3	VL 826
SIMes-Pd-DMS	EtOH	K2CO3	3	VL 826
IDD-Pd-DMS	EtOH	K2CO3	6	VL 826
SIDD-Pd-DMS	EtOH	K2CO3	2	VL 826
IPr*-Pd-DMS	EtOH	K2CO3	21	VL 826
IPr*OMe-Pd-DMS	EtOH	K2CO3	9	VL 826
IPr-Pd-DMS	EtOH	Cs2CO3	7	VL 826
SIPr-Pd-DMS	EtOH	Cs2CO3	7	VL 826
IMes-Pd-DMS	EtOH	Cs2CO3	2	VL 826
SIMes-Pd-DMS	EtOH	Cs2CO3	2	VL 826
IDD-Pd-DMS	EtOH	Cs2CO3	26	VL 826
SIDD-Pd-DMS	EtOH	Cs2CO3	20	VL 826
IPr*-Pd-DMS	EtOH	Cs2CO3	31	VL 826
IPr*OMe-Pd-DMS	EtOH	Cs2CO3	29	VL 826
IPr-Pd-DMS	EtOH	K3PO4	2	VL 826
SIPr-Pd-DMS	EtOH	K3PO4	9	VL 826
IMes-Pd-DMS	EtOH	K3PO4	4	VL 826
SIMes-Pd-DMS	EtOH	K3PO4	2	VL 826
IDD-Pd-DMS	EtOH	K3PO4	10	VL 826
SIDD-Pd-DMS	EtOH	K3PO4	9	VL 826
IPr*-Pd-DMS	EtOH	K3PO4	47	VL 826
IPr*OMe-Pd-DMS	EtOH	K3PO4	53	VL 826
IPr-Pd-DMS	EtOH	K2CO3	2	VL 825
SIPr-Pd-DMS	EtOH	K2CO3	2	VL 825
IMes-Pd-DMS	EtOH	K2CO3	3	VL 825
SIMes-Pd-DMS	EtOH	K2CO3	2	VL 825
IDD-Pd-DMS	EtOH	K2CO3	6	VL 825
SIDD-Pd-DMS	EtOH	K2CO3	2	VL 825
IPr*-Pd-DMS	EtOH	K2CO3	25	VL 825
IPr*OMe-Pd-DMS	EtOH	K2CO3	17	VL 825
IPr-Pd-DMS	EtOH	Cs2CO3	9	VL 825
SIPr-Pd-DMS	EtOH	Cs2CO3	8	VL 825
IMes-Pd-DMS	EtOH	Cs2CO3	2	VL 825
SIMes-Pd-DMS	EtOH	Cs2CO3	2	VL 825
IDD-Pd-DMS	EtOH	Cs2CO3	25	VL 825
SIDD-Pd-DMS	EtOH	Cs2CO3	14	VL 825
IPr*-Pd-DMS	EtOH	Cs2CO3	25	VL 825
IPr*OMe-Pd-DMS	EtOH	Cs2CO3	22	VL 825
IPr-Pd-DMS	EtOH	K3PO4	2	VL 825
SIPr-Pd-DMS	EtOH	K3PO4	6	VL 825
IMes-Pd-DMS	EtOH	K3PO4	2	VL 825
SIMes-Pd-DMS	EtOH	K3PO4	2	VL 825
IDD-Pd-DMS	EtOH	K3PO4	10	VL 825
SIDD-Pd-DMS	EtOH	K3PO4	9	VL 825
IPr*-Pd-DMS	EtOH	K3PO4	51	VL 825
IPr*OMe-Pd-DMS	EtOH	K3PO4	46	VL 825
