# Supplementary material for: Challenges in data-driven catalysis modelling: case study on palladium-NHC catalyzed Suzuki–Miyaura reactions
Source: Royal Society of Chemistry journal article supplement (doi:10.1039/d5sc06138e), 2026-01-01
Supplement: d5sc06138e2.zip [file HTE_data.xlsx]

## Sheet: Plate VL783-2_yield
			EtOH			iPrOAc			Me-THF			Toluene
			K2CO3	Cs2CO3	K3PO4	K2CO3	Cs2CO3	K3PO4	K2CO3	Cs2CO3	K3PO4	K2CO3	Cs2CO3	K3PO4
			1	2	3	4	5	6	7	8	9	10	11	12
IPr-Pd-DMS		A	93	91	94	30	92	93	15	95	55	11	73	23
SIPr-Pd-DMS		B	93	19	84	16	87	45	8	94	30	7	57	20
IMes-Pd-DMS		C	38	35	14	15	44	40	8	63	20	3	13	15
SIMes-Pd-DMS		D	32	17	20	9	38	32	5	27	13	3	15	9
IDD-Pd-DMS		E	11	14	8	5	7	11	3	7	5	3	3	3
SIDD-Pd-DMS		F	7	10	8	12	45	40	8	24	13	3	6	5
IPr*-Pd-DMS		G	78	11	37	26	43	33	16	20	18	21	91	19
IPr*OMe-Pd-DMS		H	76	9	30	23	46	22	13	29	12	19	84	15

## Sheet: Plate VL783-2_Conversion
			EtOH			iPrOAc			Me-THF			Toluene
			K2CO3	Cs2CO3	K3PO4	K2CO3	Cs2CO3	K3PO4	K2CO3	Cs2CO3	K3PO4	K2CO3	Cs2CO3	K3PO4
			1	2	3	4	5	6	7	8	9	10	11	12
IPr-Pd-DMS		A	100	100	100	30	100	98	7	100	55
SIPr-Pd-DMS		B	100	28	100	16	98	53	4	97	32
IMes-Pd-DMS		C	36	39	13	22	50	48	1	62	18
SIMes-Pd-DMS		D	99	21	23	11	44	31	0	24	9
IDD-Pd-DMS		E	11	34	14	1	6	12	0	1	0
SIDD-Pd-DMS		F	3	25	15	13	52	46	0	20	5
IPr*-Pd-DMS		G	100	41	100	33	51	42	15	16	14
IPr*OMe-Pd-DMS		H	100	37	100	25	56	26	10	26	5

## Sheet: Plate VL784_yield
			EtOH			iPrOAc			Me-THF			Toluene
			K2CO3	Cs2CO3	K3PO4	K2CO3	Cs2CO3	K3PO4	K2CO3	Cs2CO3	K3PO4	K2CO3	Cs2CO3	K3PO4
			1	2	3	4	5	6	7	8	9	10	11	12
IPr#-Pd-DMS		A	72	16	24	14	83	28	14	85	41	48	81	28
BIAN-IMes-Pd-DMS		B	18	23	16	7	18	24	5	27	15	3	8	6
BIAN-IPr-Pd-DMS		C	89	19	92	11	69	21	7	52	18	5	26	12
BIAN-IPr#-Pd-DMS		D	21	6	24	5	13	10	3	8	6	3	3	3
IPrCl-Pd-DMS		E	83	23	89	31	84	44	25	87	36	32	55	27
IPentCl-Pd-DMS		F	75	31	65	55	81	65	46	88	72	45	85	44
INonCl-Pd-DMS		G	74	28	49	36	79	30	29	57	24	67	82	38
IPriPr-Pd-DMS		H	73	71	74	19	82	26	19	85	20	3	81	9

## Sheet: Plate VL784_conversion
			EtOH			iPrOAc			Me-THF			Toluene
			K2CO3	Cs2CO3	K3PO4	K2CO3	Cs2CO3	K3PO4	K2CO3	Cs2CO3	K3PO4	K2CO3	Cs2CO3	K3PO4
			1	2	3	4	5	6	7	8	9	10	11	12
IPr#-Pd-DMS		A	100	50	100	28	100	37	15	100	46
BIAN-IMes-Pd-DMS		B	8	16	8	11	23	30	5	31	16
BIAN-IPr-Pd-DMS		C	100	24	100	19	82	25	7	59	18
BIAN-IPr#-Pd-DMS		D	42	12	100	17	24	24	12	17	10
IPrCl-Pd-DMS		E	100	41	100	42	100	58	31	97	41
IPentCl-Pd-DMS		F	100	100	100	71	100	87	55	100	87
INonCl-Pd-DMS		G	100	100	100	47	100	43	34	65	28
IPriPr-Pd-DMS		H	100	100	100	30	100	40	26	100	28

## Sheet: pivoted
Catalyst	Solvent	Base	Method1_Yield1	Method1_Yield2	Method2_Yield1	Method2_Yield2	Method2_Yield3	Method1_Conversion1	Method1_Conversion2	Method2_Conversion1	Method2_Conversion2	Method2_Conversion3
IPr-Pd-DMS	EtOH	K2CO3	93	85	69	64	90	100	100	100	100	100
SIPr-Pd-DMS	EtOH	K2CO3	93	84	86	93	87	100	100	100	100	100
IMes-Pd-DMS	EtOH	K2CO3	38	39	41	40	44	36	44	41	48	49
SIMes-Pd-DMS	EtOH	K2CO3	32	31	31	33	40	99	40	43	44	45
IDD-Pd-DMS	EtOH	K2CO3	11	10	11	9	9	11	27	28	15	16
SIDD-Pd-DMS	EtOH	K2CO3	7	7	6	5	6	3	12	6	9	8
IPr*-Pd-DMS	EtOH	K2CO3	78	71	72	67	72	100	100	100	100	100
IPr*OMe-Pd-DMS	EtOH	K2CO3	76	77	63	67	67	100	100	100	100	100
IPr#-Pd-DMS	EtOH	K2CO3	72	64	71	69.6109		100	100	100	97
BIAN-IMes-Pd-DMS	EtOH	K2CO3	18	24	19	17.8416		8	25	14	11
BIAN-IPr-Pd-DMS	EtOH	K2CO3	89	84	90	86.9304		100	100	100	96
BIAN-IPr#-Pd-DMS	EtOH	K2CO3	21	18	10	10.6581		42	44	23	22
IPrCl-Pd-DMS	EtOH	K2CO3	83	84	91	88.6453		100	100	100	97
IPentCl-Pd-DMS	EtOH	K2CO3	75	78	88	85.5727		100	100	100	96
INonCl-Pd-DMS	EtOH	K2CO3	74	79	84	73.4664		100	100	100	96
IPriPr-Pd-DMS	EtOH	K2CO3	73	80	90	88.622		100	100	100	96
IPr-Pd-DMS	EtOH	Cs2CO3	91	77	73	71	83	100	100	90	92	100
SIPr-Pd-DMS	EtOH	Cs2CO3	19	17	10	10	17	28	33	19	18	27
IMes-Pd-DMS	EtOH	Cs2CO3	35	42	33	39	54	39	54	35	45	65
SIMes-Pd-DMS	EtOH	Cs2CO3	17	17	11	11	19	21	29	12	19	31
IDD-Pd-DMS	EtOH	Cs2CO3	14	15	13	13	16	34	50	34	38	41
SIDD-Pd-DMS	EtOH	Cs2CO3	10	10	8	8	12	25	29	16	24	34
IPr*-Pd-DMS	EtOH	Cs2CO3	11	10	7	7	12	41	44	32	31	44
IPr*OMe-Pd-DMS	EtOH	Cs2CO3	9	9	6	14	9	37	38	36	29	37
IPr#-Pd-DMS	EtOH	Cs2CO3	16	14	17	15.9898		50	53	70	59
BIAN-IMes-Pd-DMS	EtOH	Cs2CO3	23	19	16	16.2629		16	20	16	14
BIAN-IPr-Pd-DMS	EtOH	Cs2CO3	19	14	17	18.2139		24	20	23	20
BIAN-IPr#-Pd-DMS	EtOH	Cs2CO3	6	6	6	6.0908		12	20	17	12
IPrCl-Pd-DMS	EtOH	Cs2CO3	23	20	27	29.9286		41	41	41	38
IPentCl-Pd-DMS	EtOH	Cs2CO3	31	29	32	36.0599		100	100	100	96
INonCl-Pd-DMS	EtOH	Cs2CO3	28	71	30	34.7509		100	100	100	97
IPriPr-Pd-DMS	EtOH	Cs2CO3	71	79	84	84.4845		100	100	100	96
IPr-Pd-DMS	EtOH	K3PO4	94	88	93	91	3	100	100	100	100	0
SIPr-Pd-DMS	EtOH	K3PO4	84	77	82	84	82	100	100	100	100	100
IMes-Pd-DMS	EtOH	K3PO4	14	16	31	31	25	13	20	32	34	28
SIMes-Pd-DMS	EtOH	K3PO4	20	19	29	34	32	23	27	32	43	39
IDD-Pd-DMS	EtOH	K3PO4	8	8	10	12	9	14	22	17	18	17
SIDD-Pd-DMS	EtOH	K3PO4	8	8	9	8	8	15	19	16	13	15
IPr*-Pd-DMS	EtOH	K3PO4	37	35	40	47	50	100	100	100	100	100
IPr*OMe-Pd-DMS	EtOH	K3PO4	30	37	48	51	49	100	100	100	100	100
IPr#-Pd-DMS	EtOH	K3PO4	24	24	35	37.8878		100	100	100	97
BIAN-IMes-Pd-DMS	EtOH	K3PO4	16	12	25	23.9702		8	10	21	15
BIAN-IPr-Pd-DMS	EtOH	K3PO4	92	84	87	87.7073		100	100	100	97
BIAN-IPr#-Pd-DMS	EtOH	K3PO4	24	21	22	23.2724		100	100	73	81
IPrCl-Pd-DMS	EtOH	K3PO4	89	83	87	87.7904		100	100	100	97
IPentCl-Pd-DMS	EtOH	K3PO4	65	68	70	72.8351		100	100	100	97
INonCl-Pd-DMS	EtOH	K3PO4	49	63	69	70.8966		100	100	100	97
IPriPr-Pd-DMS	EtOH	K3PO4	74	87	88	89.8199		100	100	100	97
IPr-Pd-DMS	iPrOAc	K2CO3	30	30	14	13	26	30	33	16	10	32
SIPr-Pd-DMS	iPrOAc	K2CO3	16	17	9	8	12	16	19	11	6	14
IMes-Pd-DMS	iPrOAc	K2CO3	15	15	12	11	14	22	22	13	21	27
SIMes-Pd-DMS	iPrOAc	K2CO3	9	10	8	6	8	11	11	4	19	12
IDD-Pd-DMS	iPrOAc	K2CO3	5	5	5	3	5	1	4	0	5	4
SIDD-Pd-DMS	iPrOAc	K2CO3	12	9	9	7	10	13	10	3	5	10
IPr*-Pd-DMS	iPrOAc	K2CO3	26	27	11	5	21	33	31	5	9	21
IPr*OMe-Pd-DMS	iPrOAc	K2CO3	23	23	10	8	17	25	29	5	5	18
IPr#-Pd-DMS	iPrOAc	K2CO3	14	10	5	4.74851		28	19	0	0
BIAN-IMes-Pd-DMS	iPrOAc	K2CO3	7	8	5	5.1218		11	7	1	0
BIAN-IPr-Pd-DMS	iPrOAc	K2CO3	11	13	5	5.71989		19	16	9	0
BIAN-IPr#-Pd-DMS	iPrOAc	K2CO3	5	5	3	3.44249		17	9	7	9
IPrCl-Pd-DMS	iPrOAc	K2CO3	31	28	14	14.2295		42	35	10	5
IPentCl-Pd-DMS	iPrOAc	K2CO3	55	38	22	21.2517		71	48	23	18
INonCl-Pd-DMS	iPrOAc	K2CO3	36	30	14	13.0304		47	35	17	9
IPriPr-Pd-DMS	iPrOAc	K2CO3	19	19	10	9.91553		30	24	12	7
IPr-Pd-DMS	iPrOAc	Cs2CO3	92	88	94	89	85	100	100	100	100	100
SIPr-Pd-DMS	iPrOAc	Cs2CO3	87	80	86	84	85	98	94	95	96	100
IMes-Pd-DMS	iPrOAc	Cs2CO3	44	55	48	49	67	50	64	47	54	77
SIMes-Pd-DMS	iPrOAc	Cs2CO3	38	51	42	38	46	44	58	46	40	51
IDD-Pd-DMS	iPrOAc	Cs2CO3	7	7	21	20	19	6	18	19	23	22
SIDD-Pd-DMS	iPrOAc	Cs2CO3	45	51	57	53	56	52	65	62	61	66
IPr*-Pd-DMS	iPrOAc	Cs2CO3	43	40	27	25	63	51	58	25	25	72
IPr*OMe-Pd-DMS	iPrOAc	Cs2CO3	46	42	18	17	47	56	51	15	27	55
IPr#-Pd-DMS	iPrOAc	Cs2CO3	83	87	58	87.89		100	100	62	97
BIAN-IMes-Pd-DMS	iPrOAc	Cs2CO3	18	29	14	13.318		23	30	10	5
BIAN-IPr-Pd-DMS	iPrOAc	Cs2CO3	69	60	69	72.4865		82	65	76	77
BIAN-IPr#-Pd-DMS	iPrOAc	Cs2CO3	13	9	8	8.03983		24	16	9	4
IPrCl-Pd-DMS	iPrOAc	Cs2CO3	84	87	90	91.1783		100	100	100	94
IPentCl-Pd-DMS	iPrOAc	Cs2CO3	81	86	90	92.0097		100	100	100	96
INonCl-Pd-DMS	iPrOAc	Cs2CO3	79	86	90	89.2433		100	100	100	97
IPriPr-Pd-DMS	iPrOAc	Cs2CO3	82	85	90	89.7626		100	100	100	97
IPr-Pd-DMS	iPrOAc	K3PO4	93	81	74	62	88	98	93	76	68	100
SIPr-Pd-DMS	iPrOAc	K3PO4	45	43	40	35	66	53	49	39	37	78
IMes-Pd-DMS	iPrOAc	K3PO4	40	42	32	37	56	48	50	32	43	65
SIMes-Pd-DMS	iPrOAc	K3PO4	32	31	25	29	43	31	36	22	30	47
IDD-Pd-DMS	iPrOAc	K3PO4	11	9	7	10	7	12	10	7	8	10
SIDD-Pd-DMS	iPrOAc	K3PO4	40	41	31	27	25	46	49	38	29	27
IPr*-Pd-DMS	iPrOAc	K3PO4	33	30	45	22	89	42	43	50	22	100
IPr*OMe-Pd-DMS	iPrOAc	K3PO4	22	20	39	13	85	26	23	46	18	100
IPr#-Pd-DMS	iPrOAc	K3PO4	28	25	59	48.327		37	26	63	46
BIAN-IMes-Pd-DMS	iPrOAc	K3PO4	24	23	29	28.5958		30	24	27	24
BIAN-IPr-Pd-DMS	iPrOAc	K3PO4	21	23	35	34.5077		25	29	36	32
BIAN-IPr#-Pd-DMS	iPrOAc	K3PO4	10	12	11	10.5767		24	15	11	6
IPrCl-Pd-DMS	iPrOAc	K3PO4	44	47	70	64.9159		58	54	76	66
IPentCl-Pd-DMS	iPrOAc	K3PO4	65	72	86	87.6343		87	86	100	92
INonCl-Pd-DMS	iPrOAc	K3PO4	30	32	48	48.9698		43	39	53	52
IPriPr-Pd-DMS	iPrOAc	K3PO4	26	34	58	81.4508		40	40	71	92
IPr-Pd-DMS	Me-THF	K2CO3	15	16	10	7	15	7	15	3	0	13
SIPr-Pd-DMS	Me-THF	K2CO3	8	9	6	5	8	4	8	4	0	7
IMes-Pd-DMS	Me-THF	K2CO3	8	9	5	5	10	1	7	0	3	13
SIMes-Pd-DMS	Me-THF	K2CO3	5	5	3	3	5	0	3	0	1	5
IDD-Pd-DMS	Me-THF	K2CO3	3	3	3	3	4	0	2	0	0	2
SIDD-Pd-DMS	Me-THF	K2CO3	8	8	5	5	9	0	8	0	0	7
IPr*-Pd-DMS	Me-THF	K2CO3	16	18	6	5	17	15	20	0	2	15
IPr*OMe-Pd-DMS	Me-THF	K2CO3	13	16	6	5	12	10	15	1	5	17
IPr#-Pd-DMS	Me-THF	K2CO3	14	13	3	3.44249		15	10	0	0
BIAN-IMes-Pd-DMS	Me-THF	K2CO3	5	5	3	3.44249		5	2	0	0
BIAN-IPr-Pd-DMS	Me-THF	K2CO3	7	7	3	3.44249		7	5	0	0
BIAN-IPr#-Pd-DMS	Me-THF	K2CO3	3	3	3	3.44249		12	6	3	0
IPrCl-Pd-DMS	Me-THF	K2CO3	25	21	10	4.53697		31	22	0	0
IPentCl-Pd-DMS	Me-THF	K2CO3	46	35	13	12.0256		55	38	10	3
INonCl-Pd-DMS	Me-THF	K2CO3	29	24	9	7.65703		34	26	5	0
IPriPr-Pd-DMS	Me-THF	K2CO3	19	17	4	4.41639		26	19	0	0
IPr-Pd-DMS	Me-THF	Cs2CO3	95	90	93	91	89	100	100	100	100	100
SIPr-Pd-DMS	Me-THF	Cs2CO3	94	79	68	66	79	97	89	76	70	88
IMes-Pd-DMS	Me-THF	Cs2CO3	63	55	44	41	66	62	60	43	40	71
SIMes-Pd-DMS	Me-THF	Cs2CO3	27	28	27	25	36	24	29	26	23	36
IDD-Pd-DMS	Me-THF	Cs2CO3	7	9	12	13	19	1	7	13	11	21
SIDD-Pd-DMS	Me-THF	Cs2CO3	24	19	27	36	45	20	19	31	40	52
IPr*-Pd-DMS	Me-THF	Cs2CO3	20	31	13	10	26	16	35	8	9	24
IPr*OMe-Pd-DMS	Me-THF	Cs2CO3	29	28	11	15	30	26	29	9	20	36
IPr#-Pd-DMS	Me-THF	Cs2CO3	85	54	53	21.9778		100	60	55	19
BIAN-IMes-Pd-DMS	Me-THF	Cs2CO3	27	21	15	14.6641		31	20	8	7
BIAN-IPr-Pd-DMS	Me-THF	Cs2CO3	52	26	27	28.4566		59	24	25	25
BIAN-IPr#-Pd-DMS	Me-THF	Cs2CO3	8	7	6	6.31948		17	9	5	0
IPrCl-Pd-DMS	Me-THF	Cs2CO3	87	69	87	88.7564		97	77	95	93
IPentCl-Pd-DMS	Me-THF	Cs2CO3	88	87	90	89.8351		100	100	100	96
INonCl-Pd-DMS	Me-THF	Cs2CO3	57	37	76	88.8904		65	39	90	96
IPriPr-Pd-DMS	Me-THF	Cs2CO3	85	87	89	88.7944		100	100	100	97
IPr-Pd-DMS	Me-THF	K3PO4	55	58	47	35	89	55	65	46	35	100
SIPr-Pd-DMS	Me-THF	K3PO4	30	31	27	26	32	32	35	28	21	33
IMes-Pd-DMS	Me-THF	K3PO4	20	28	23	23	40	18	30	22	23	43
SIMes-Pd-DMS	Me-THF	K3PO4	13	19	17	16	27	9	18	16	14	27
IDD-Pd-DMS	Me-THF	K3PO4	5	5	5	5	5	0	3	0	0	1
SIDD-Pd-DMS	Me-THF	K3PO4	13	11	11	14	16	5	8	7	13	16
IPr*-Pd-DMS	Me-THF	K3PO4	18	19	35	21	56	14	19	37	19	62
IPr*OMe-Pd-DMS	Me-THF	K3PO4	12	13	27	15	40	5	14	26	14	50
IPr#-Pd-DMS	Me-THF	K3PO4	41	32	59	61.1118		46	34	65	62
BIAN-IMes-Pd-DMS	Me-THF	K3PO4	15	14	27	24.3334		16	13	24	18
BIAN-IPr-Pd-DMS	Me-THF	K3PO4	18	17	31	19.0456		18	16	29	13
BIAN-IPr#-Pd-DMS	Me-THF	K3PO4	6	5	7	7.03533		10	6	6	4
IPrCl-Pd-DMS	Me-THF	K3PO4	36	35	57	58.839		41	37	57	57
IPentCl-Pd-DMS	Me-THF	K3PO4	72	69	86	88.0424		87	79	99	96
INonCl-Pd-DMS	Me-THF	K3PO4	24	27	67	49.3041		28	30	74	50
IPriPr-Pd-DMS	Me-THF	K3PO4	20	23	66	66.3956		28	27	76	73
IPr-Pd-DMS	Toluene	K2CO3	11	12	10	3	7
SIPr-Pd-DMS	Toluene	K2CO3	7	7	5	3	3
IMes-Pd-DMS	Toluene	K2CO3	3	3	3	3	3
SIMes-Pd-DMS	Toluene	K2CO3	3	3	3	3	3
IDD-Pd-DMS	Toluene	K2CO3	3	3	3	3	3
SIDD-Pd-DMS	Toluene	K2CO3	3	3	3	3	3
IPr*-Pd-DMS	Toluene	K2CO3	21	21	9	3	15
IPr*OMe-Pd-DMS	Toluene	K2CO3	19	19	9	3	14
IPr#-Pd-DMS	Toluene	K2CO3	48	14	3	3.44249
BIAN-IMes-Pd-DMS	Toluene	K2CO3	3	3	3	3.44249
BIAN-IPr-Pd-DMS	Toluene	K2CO3	5	3	14	3.44249
BIAN-IPr#-Pd-DMS	Toluene	K2CO3	3	3	3	3.44249
IPrCl-Pd-DMS	Toluene	K2CO3	32	27	11	5.83935
IPentCl-Pd-DMS	Toluene	K2CO3	45	41	11	9.78334
INonCl-Pd-DMS	Toluene	K2CO3	67	51	15	9.54164
IPriPr-Pd-DMS	Toluene	K2CO3	3	3	3	3.44249
IPr-Pd-DMS	Toluene	Cs2CO3	73	64	82	48	79
SIPr-Pd-DMS	Toluene	Cs2CO3	57	47	59	29	62
IMes-Pd-DMS	Toluene	Cs2CO3	13	15	21	22	20
SIMes-Pd-DMS	Toluene	Cs2CO3	15	16	17	17	15
IDD-Pd-DMS	Toluene	Cs2CO3	3	3	3	3	3
SIDD-Pd-DMS	Toluene	Cs2CO3	6	7	9	9	6
IPr*-Pd-DMS	Toluene	Cs2CO3	91	85	28	16	97
IPr*OMe-Pd-DMS	Toluene	Cs2CO3	84	67	8	16	78
IPr#-Pd-DMS	Toluene	Cs2CO3	81	83	85	70.8102
BIAN-IMes-Pd-DMS	Toluene	Cs2CO3	8	8	15	13.2488
BIAN-IPr-Pd-DMS	Toluene	Cs2CO3	26	25	26	22.4923
BIAN-IPr#-Pd-DMS	Toluene	Cs2CO3	3	3	3	3.44249
IPrCl-Pd-DMS	Toluene	Cs2CO3	55	76	66	66.9531
IPentCl-Pd-DMS	Toluene	Cs2CO3	85	87	88	76.9627
INonCl-Pd-DMS	Toluene	Cs2CO3	82	86	97
IPriPr-Pd-DMS	Toluene	Cs2CO3	81	87	96	70.5398
IPr-Pd-DMS	Toluene	K3PO4	23	20	19	12	20
SIPr-Pd-DMS	Toluene	K3PO4	20	13	10	9	13
IMes-Pd-DMS	Toluene	K3PO4	15	13	11	11	16
SIMes-Pd-DMS	Toluene	K3PO4	9	8	6	3	7
IDD-Pd-DMS	Toluene	K3PO4	3	3	3	3	3
SIDD-Pd-DMS	Toluene	K3PO4	5	6	3	3	3
IPr*-Pd-DMS	Toluene	K3PO4	19	20	27	12	35
IPr*OMe-Pd-DMS	Toluene	K3PO4	15	15	22	8	41
IPr#-Pd-DMS	Toluene	K3PO4	28	26	30	40.1735
BIAN-IMes-Pd-DMS	Toluene	K3PO4	6	6	6	6.21705
BIAN-IPr-Pd-DMS	Toluene	K3PO4	12	11	9	9.5569
BIAN-IPr#-Pd-DMS	Toluene	K3PO4	3	3	3	3.44249
IPrCl-Pd-DMS	Toluene	K3PO4	27	25	40	39.6447
IPentCl-Pd-DMS	Toluene	K3PO4	44	41	63	38.7071
INonCl-Pd-DMS	Toluene	K3PO4	38	39	69	45.1083
IPriPr-Pd-DMS	Toluene	K3PO4	9	12	17	16.9716

## Sheet: pivoted_first_plate
Catalyst	Solvent	Base	783_Method1_Yield1	783bis_Method1_Yield2	797_Method2_Yield1	825_Method2_Yield2	826_Method2_Yield3	783_Method1_Conversion1	783bis_Method1_Conversion2	797_Method2_Conversion1	825_Method2_Conversion2	826_Method2_Conversion3	825GC_Method2_Yield2	825GC_Method2_Conversion2	826GC_Method2_Yield3	826GC_Method2_Conversion3
IPr-Pd-DMS	EtOH	K2CO3	93	85	69	64	90	100	100	100	100	100	62	60	91	100
SIPr-Pd-DMS	EtOH	K2CO3	93	84	86	93	87	100	100	100	100	100	53	100	89	100
IMes-Pd-DMS	EtOH	K2CO3	38	39	41	40	44	36	44	41	48	49	38	52	42	53
SIMes-Pd-DMS	EtOH	K2CO3	32	31	31	33	40	99	40	43	44	45	31	47	38	49
IDD-Pd-DMS	EtOH	K2CO3	11	10	11	9	9	11	27	28	15	16	7	21	6	21
SIDD-Pd-DMS	EtOH	K2CO3	7	7	6	5	6	3	12	6	9	8	3	12	4	12
IPr*-Pd-DMS	EtOH	K2CO3	78	71	72	67	72	100	100	100	100	100	66	100	72	100
IPr*OMe-Pd-DMS	EtOH	K2CO3	76	77	63	67	67	100	100	100	100	100	70	100	69	100
IPr-Pd-DMS	EtOH	Cs2CO3	91	77	73	71	83	100	100	90	92	100	71	94	83	100
SIPr-Pd-DMS	EtOH	Cs2CO3	19	17	10	10	17	28	33	19	18	27	7	22	15	30
IMes-Pd-DMS	EtOH	Cs2CO3	35	42	33	39	54	39	54	35	45	65	36	47	53	68
SIMes-Pd-DMS	EtOH	Cs2CO3	17	17	11	11	19	21	29	12	19	31	9	20	17	34
IDD-Pd-DMS	EtOH	Cs2CO3	14	15	13	13	16	34	50	34	38	41	10	41	13	44
SIDD-Pd-DMS	EtOH	Cs2CO3	10	10	8	8	12	25	29	16	24	34	6	26	9	37
IPr*-Pd-DMS	EtOH	Cs2CO3	11	10	7	7	12	41	44	32	31	44	5	37	10	49
IPr*OMe-Pd-DMS	EtOH	Cs2CO3	9	9	6	14	9	37	38	36	29	37	4	32	8	41
IPr-Pd-DMS	EtOH	K3PO4	94	88	93	91	3	100	100	100	100	0	93	100	1	2
SIPr-Pd-DMS	EtOH	K3PO4	84	77	82	84	82	100	100	100	100	100	84	100	84	100
IMes-Pd-DMS	EtOH	K3PO4	14	16	31	31	25	13	20	32	34	28	28	37	24	32
SIMes-Pd-DMS	EtOH	K3PO4	20	19	29	34	32	23	27	32	43	39	32	47	29	43
IDD-Pd-DMS	EtOH	K3PO4	8	8	10	12	9	14	22	17	18	17	9	22	7	21
SIDD-Pd-DMS	EtOH	K3PO4	8	8	9	8	8	15	19	16	13	15	6	16	5	20
IPr*-Pd-DMS	EtOH	K3PO4	37	35	40	47	50	100	100	100	100	100	45	100	48	100
IPr*OMe-Pd-DMS	EtOH	K3PO4	30	37	48	51	49	100	100	100	100	100	50	100	48	100
IPr-Pd-DMS	iPrOAc	K2CO3	30	30	14	13	26	30	33	16	10	32	11	16	24	36
SIPr-Pd-DMS	iPrOAc	K2CO3	16	17	9	8	12	16	19	11	6	14	5	8	10	18
IMes-Pd-DMS	iPrOAc	K2CO3	15	15	12	11	14	22	22	13	21	27	9	13	13	20
SIMes-Pd-DMS	iPrOAc	K2CO3	9	10	8	6	8	11	11	4	19	12	4	20	6	13
IDD-Pd-DMS	iPrOAc	K2CO3	5	5	5	3	5	1	4	0	5	4	2	9	2	9
SIDD-Pd-DMS	iPrOAc	K2CO3	12	9	9	7	10	13	10	3	5	10	4	9	8	16
IPr*-Pd-DMS	iPrOAc	K2CO3	26	27	11	5	21	33	31	5	9	21	3	13	18	25
IPr*OMe-Pd-DMS	iPrOAc	K2CO3	23	23	10	8	17	25	29	5	5	18	3	7	15	22
IPr-Pd-DMS	iPrOAc	Cs2CO3	92	88	94	89	85	100	100	100	100	100	90	100	88	100
SIPr-Pd-DMS	iPrOAc	Cs2CO3	87	80	86	84	85	98	94	95	96	100	84	98	87	100
IMes-Pd-DMS	iPrOAc	Cs2CO3	44	55	48	49	67	50	64	47	54	77	48	56	68	79
SIMes-Pd-DMS	iPrOAc	Cs2CO3	38	51	42	38	46	44	58	46	40	51	36	43	45	55
IDD-Pd-DMS	iPrOAc	Cs2CO3	7	7	21	20	19	6	18	19	23	22	18	28	16	27
SIDD-Pd-DMS	iPrOAc	Cs2CO3	45	51	57	53	56	52	65	62	61	66	52	64	55	70
IPr*-Pd-DMS	iPrOAc	Cs2CO3	43	40	27	25	63	51	58	25	25	72	22	31	62	76
IPr*OMe-Pd-DMS	iPrOAc	Cs2CO3	46	42	18	17	47	56	51	15	27	55	16	26	47	59
IPr-Pd-DMS	iPrOAc	K3PO4	93	81	74	62	88	98	93	76	68	100	61	72	90	100
SIPr-Pd-DMS	iPrOAc	K3PO4	45	43	40	35	66	53	49	39	37	78	32	41	66	81
IMes-Pd-DMS	iPrOAc	K3PO4	40	42	32	37	56	48	50	32	43	65	37	40	56	67
SIMes-Pd-DMS	iPrOAc	K3PO4	32	31	25	29	43	31	36	22	30	47	26	32	41	51
IDD-Pd-DMS	iPrOAc	K3PO4	11	9	7	10	7	12	10	7	8	10	8	11	5	15
SIDD-Pd-DMS	iPrOAc	K3PO4	40	41	31	27	25	46	49	38	29	27	25	33	23	33
IPr*-Pd-DMS	iPrOAc	K3PO4	33	30	45	22	89	42	43	50	22	100	20	26	88	100
IPr*OMe-Pd-DMS	iPrOAc	K3PO4	22	20	39	13	85	26	23	46	18	100	11	13	89	100
IPr-Pd-DMS	Me-THF	K2CO3	15	16	10	7	15	7	15	3	0	13	4	3	12	15
SIPr-Pd-DMS	Me-THF	K2CO3	8	9	6	5	8	4	8	4	0	7	2	2	5	10
IMes-Pd-DMS	Me-THF	K2CO3	8	9	5	5	10	1	7	0	3	13	2	1	7	11
SIMes-Pd-DMS	Me-THF	K2CO3	5	5	3	3	5	0	3	0	1	5	1	1	3	7
IDD-Pd-DMS	Me-THF	K2CO3	3	3	3	3	4	0	2	0	0	2	1	1	2	7
SIDD-Pd-DMS	Me-THF	K2CO3	8	8	5	5	9	0	8	0	0	7	2	5	6	13
IPr*-Pd-DMS	Me-THF	K2CO3	16	18	6	5	17	15	20	0	2	15	3	7	14	19
IPr*OMe-Pd-DMS	Me-THF	K2CO3	13	16	6	5	12	10	15	1	5	17	2	8	11	24
IPr-Pd-DMS	Me-THF	Cs2CO3	95	90	93	91	89	100	100	100	100	100	93	100	91	100
SIPr-Pd-DMS	Me-THF	Cs2CO3	94	79	68	66	79	97	89	76	70	88	65	73	80	92
IMes-Pd-DMS	Me-THF	Cs2CO3	63	55	44	41	66	62	60	43	40	71	39	45	65	74
SIMes-Pd-DMS	Me-THF	Cs2CO3	27	28	27	25	36	24	29	26	23	36	23	26	34	41
IDD-Pd-DMS	Me-THF	Cs2CO3	7	9	12	13	19	1	7	13	11	21	10	16	16	25
SIDD-Pd-DMS	Me-THF	Cs2CO3	24	19	27	36	45	20	19	31	40	52	34	43	44	57
IPr*-Pd-DMS	Me-THF	Cs2CO3	20	31	13	10	26	16	35	8	9	24	8	14	23	31
IPr*OMe-Pd-DMS	Me-THF	Cs2CO3	29	28	11	15	30	26	29	9	20	36	14	20	30	39
IPr-Pd-DMS	Me-THF	K3PO4	55	58	47	35	89	55	65	46	35	100	34	41	91	100
SIPr-Pd-DMS	Me-THF	K3PO4	30	31	27	26	32	32	35	28	21	33	23	23	30	38
IMes-Pd-DMS	Me-THF	K3PO4	20	28	23	23	40	18	30	22	23	43	21	24	39	45
SIMes-Pd-DMS	Me-THF	K3PO4	13	19	17	16	27	9	18	16	14	27	14	16	24	30
IDD-Pd-DMS	Me-THF	K3PO4	5	5	5	5	5	0	3	0	0	1	3	4	3	7
SIDD-Pd-DMS	Me-THF	K3PO4	13	11	11	14	16	5	8	7	13	16	12	17	14	21
IPr*-Pd-DMS	Me-THF	K3PO4	18	19	35	21	56	14	19	37	19	62	19	21	54	67
IPr*OMe-Pd-DMS	Me-THF	K3PO4	12	13	27	15	40	5	14	26	14	50	12	16	41	52
IPr-Pd-DMS	Toluene	K2CO3	11	12	10	3	7						1	0	5	10
SIPr-Pd-DMS	Toluene	K2CO3	7	7	5	3	3						1	0	2	2
IMes-Pd-DMS	Toluene	K2CO3	3	3	3	3	3						1	0	1	0
SIMes-Pd-DMS	Toluene	K2CO3	3	3	3	3	3						1	0	1	0
IDD-Pd-DMS	Toluene	K2CO3	3	3	3	3	3						1	0	1	0
SIDD-Pd-DMS	Toluene	K2CO3	3	3	3	3	3						1	0	1	4
IPr*-Pd-DMS	Toluene	K2CO3	21	21	9	3	15						1	0	11	9
IPr*OMe-Pd-DMS	Toluene	K2CO3	19	19	9	3	14						1	0	11	16
IPr-Pd-DMS	Toluene	Cs2CO3	73	64	82	48	79						47	52	79	85
SIPr-Pd-DMS	Toluene	Cs2CO3	57	47	59	29	62						26	27	61	74
IMes-Pd-DMS	Toluene	Cs2CO3	13	15	21	22	20						19	22	17	14
SIMes-Pd-DMS	Toluene	Cs2CO3	15	16	17	17	15						15	6	12	9
IDD-Pd-DMS	Toluene	Cs2CO3	3	3	3	3	3						2	0	1	0
SIDD-Pd-DMS	Toluene	Cs2CO3	6	7	9	9	6						7	7	4	16
IPr*-Pd-DMS	Toluene	Cs2CO3	91	85	28	16	97						13	14	96	100
IPr*OMe-Pd-DMS	Toluene	Cs2CO3	84	67	8	16	78						15	14	83	97
IPr-Pd-DMS	Toluene	K3PO4	23	20	19	12	20						9	10	18	16
SIPr-Pd-DMS	Toluene	K3PO4	20	13	10	9	13						7	4	10	13
IMes-Pd-DMS	Toluene	K3PO4	15	13	11	11	16						8	8	13	12
SIMes-Pd-DMS	Toluene	K3PO4	9	8	6	3	7						3	0	4	5
IDD-Pd-DMS	Toluene	K3PO4	3	3	3	3	3						1	0	1	5
SIDD-Pd-DMS	Toluene	K3PO4	5	6	3	3	3						1	0	2	4
IPr*-Pd-DMS	Toluene	K3PO4	19	20	27	12	35								32	41
IPr*OMe-Pd-DMS	Toluene	K3PO4	15	15	22	8	41						6	9	40	46

## Sheet: pivoted_second_plate
Catalyst	Solvent	Base	784_Method1_Yield1	784bis_Method1_Yield2	827_Method2_Yield1	828_Method2_Yield2	784_Method1_Conversion1	784bis_Method1_Conversion2	827_Method2_Conversion1	828_Method2_Conversion2	827GC_Method2_Yield1	828GC_Method2_Yield2	827_Method2GC_Conversion1	828GC_Method2_Conversion2
IPr#-Pd-DMS	EtOH	K2CO3	72	64	71	69.6109	100	100	100	97	71	69	100	100
BIAN-IMes-Pd-DMS	EtOH	K2CO3	18	24	19	17.8416	8	25	14	11	15	14	22	24
BIAN-IPr-Pd-DMS	EtOH	K2CO3	89	84	90	86.9304	100	100	100	96	91	87	100	100
BIAN-IPr#-Pd-DMS	EtOH	K2CO3	21	18	10	10.6581	42	44	23	22	8	8	25	30
IPrCl-Pd-DMS	EtOH	K2CO3	83	84	91	88.6453	100	100	100	97	92	89	100	100
IPentCl-Pd-DMS	EtOH	K2CO3	75	78	88	85.5727	100	100	100	96	88	85	100	100
INonCl-Pd-DMS	EtOH	K2CO3	74	79	84	73.4664	100	100	100	96	84	72	100	100
IPriPr-Pd-DMS	EtOH	K2CO3	73	80	90	88.622	100	100	100	96	92	89	100	100
IPr#-Pd-DMS	EtOH	Cs2CO3	16	14	17	15.9898	50	53	70	59	15	13	74	67
BIAN-IMes-Pd-DMS	EtOH	Cs2CO3	23	19	16	16.2629	16	20	16	14	13	13	23	25
BIAN-IPr-Pd-DMS	EtOH	Cs2CO3	19	14	17	18.2139	24	20	23	20	14	16	27	31
BIAN-IPr#-Pd-DMS	EtOH	Cs2CO3	6	6	6	6.0908	12	20	17	12	4	4	19	22
IPrCl-Pd-DMS	EtOH	Cs2CO3	23	20	27	29.9286	41	41	41	38	22	25	46	47
IPentCl-Pd-DMS	EtOH	Cs2CO3	31	29	32	36.0599	100	100	100	96	30	34	100	100
INonCl-Pd-DMS	EtOH	Cs2CO3	28	71	30	34.7509	100	100	100	97	27	32	100	100
IPriPr-Pd-DMS	EtOH	Cs2CO3	71	79	84	84.4845	100	100	100	96	83	83	100	100
IPr#-Pd-DMS	EtOH	K3PO4	24	24	35	37.8878	100	100	100	97	33	35	100	100
BIAN-IMes-Pd-DMS	EtOH	K3PO4	16	12	25	23.9702	8	10	21	15	20	18	29	29
BIAN-IPr-Pd-DMS	EtOH	K3PO4	92	84	87	87.7073	100	100	100	97	87	87	100	100
BIAN-IPr#-Pd-DMS	EtOH	K3PO4	24	21	22	23.2724	100	100	73	81	21	22	76	86
IPrCl-Pd-DMS	EtOH	K3PO4	89	83	87	87.7904	100	100	100	97	88	87	100	100
IPentCl-Pd-DMS	EtOH	K3PO4	65	68	70	72.8351	100	100	100	97	69	71	100	100
INonCl-Pd-DMS	EtOH	K3PO4	49	63	69	70.8966	100	100	100	97	67	68	100	100
IPriPr-Pd-DMS	EtOH	K3PO4	74	87	88	89.8199	100	100	100	97	89	89	100	100
IPr#-Pd-DMS	iPrOAc	K2CO3	14	10	5	4.74851	28	19	0	0	2	2	3	7
BIAN-IMes-Pd-DMS	iPrOAc	K2CO3	7	8	5	5.1218	11	7	1	0	3	2	6	10
BIAN-IPr-Pd-DMS	iPrOAc	K2CO3	11	13	5	5.71989	19	16	9	0	3	3	14	11
BIAN-IPr#-Pd-DMS	iPrOAc	K2CO3	5	5	3	3.44249	17	9	7	9	1	1	8	16
IPrCl-Pd-DMS	iPrOAc	K2CO3	31	28	14	14.2295	42	35	10	5	9	9	16	15
IPentCl-Pd-DMS	iPrOAc	K2CO3	55	38	22	21.2517	71	48	23	18	20	19	28	27
INonCl-Pd-DMS	iPrOAc	K2CO3	36	30	14	13.0304	47	35	17	9	11	10	23	19
IPriPr-Pd-DMS	iPrOAc	K2CO3	19	19	10	9.91553	30	24	12	7	8	8	20	13
IPr#-Pd-DMS	iPrOAc	Cs2CO3	83	87	58	87.89	100	100	62	97	57	88	66	100
BIAN-IMes-Pd-DMS	iPrOAc	Cs2CO3	18	29	14	13.318	23	30	10	5	11	10	14	15
BIAN-IPr-Pd-DMS	iPrOAc	Cs2CO3	69	60	69	72.4865	82	65	76	77	69	72	80	84
BIAN-IPr#-Pd-DMS	iPrOAc	Cs2CO3	13	9	8	8.03983	24	16	9	4	6	6	13	12
IPrCl-Pd-DMS	iPrOAc	Cs2CO3	84	87	90	91.1783	100	100	100	94	91	90	100	100
IPentCl-Pd-DMS	iPrOAc	Cs2CO3	81	86	90	92.0097	100	100	100	96	91	92	100	100
INonCl-Pd-DMS	iPrOAc	Cs2CO3	79	86	90	89.2433	100	100	100	97	90	89	100	100
IPriPr-Pd-DMS	iPrOAc	Cs2CO3	82	85	90	89.7626	100	100	100	97	91	88	100	100
IPr#-Pd-DMS	iPrOAc	K3PO4	28	25	59	48.327	37	26	63	46	58	45	67	55
BIAN-IMes-Pd-DMS	iPrOAc	K3PO4	24	23	29	28.5958	30	24	27	24	27	26	32	34
BIAN-IPr-Pd-DMS	iPrOAc	K3PO4	21	23	35	34.5077	25	29	36	32	33	32	42	43
BIAN-IPr#-Pd-DMS	iPrOAc	K3PO4	10	12	11	10.5767	24	15	11	6	8	8	15	17
IPrCl-Pd-DMS	iPrOAc	K3PO4	44	47	70	64.9159	58	54	76	66	68	63	80	76
IPentCl-Pd-DMS	iPrOAc	K3PO4	65	72	86	87.6343	87	86	100	92	87	88	100	100
INonCl-Pd-DMS	iPrOAc	K3PO4	30	32	48	48.9698	43	39	53	52	46	47	58	61
IPriPr-Pd-DMS	iPrOAc	K3PO4	26	34	58	81.4508	40	40	71	92	56	80	76	98
IPr#-Pd-DMS	Me-THF	K2CO3	14	13	3	3.44249	15	10	0	0	1	1	1	4
BIAN-IMes-Pd-DMS	Me-THF	K2CO3	5	5	3	3.44249	5	2	0	0	1	1	4	6
BIAN-IPr-Pd-DMS	Me-THF	K2CO3	7	7	3	3.44249	7	5	0	0	1	1	9	10
BIAN-IPr#-Pd-DMS	Me-THF	K2CO3	3	3	3	3.44249	12	6	3	0	1	1	6	8
IPrCl-Pd-DMS	Me-THF	K2CO3	25	21	10	4.53697	31	22	0	0	3	2	0	11
IPentCl-Pd-DMS	Me-THF	K2CO3	46	35	13	12.0256	55	38	10	3	10	10	19	19
INonCl-Pd-DMS	Me-THF	K2CO3	29	24	9	7.65703	34	26	5	0	6	5	13	12
IPriPr-Pd-DMS	Me-THF	K2CO3	19	17	4	4.41639	26	19	0	0	2	2	8	5
IPr#-Pd-DMS	Me-THF	Cs2CO3	85	54	53	21.9778	100	60	55	19	52	19	61	30
BIAN-IMes-Pd-DMS	Me-THF	Cs2CO3	27	21	15	14.6641	31	20	8	7	12	12	15	18
BIAN-IPr-Pd-DMS	Me-THF	Cs2CO3	52	26	27	28.4566	59	24	25	25	25	26	31	35
BIAN-IPr#-Pd-DMS	Me-THF	Cs2CO3	8	7	6	6.31948	17	9	5	0	4	4	11	13
IPrCl-Pd-DMS	Me-THF	Cs2CO3	87	69	87	88.7564	97	77	95	93	87	86	98	99
IPentCl-Pd-DMS	Me-THF	Cs2CO3	88	87	90	89.8351	100	100	100	96	92	90	100	100
INonCl-Pd-DMS	Me-THF	Cs2CO3	57	37	76	88.8904	65	39	90	96	75	88	94	100
IPriPr-Pd-DMS	Me-THF	Cs2CO3	85	87	89	88.7944	100	100	100	97	89	87	100	100
IPr#-Pd-DMS	Me-THF	K3PO4	41	32	59	61.1118	46	34	65	62	59	58	69	70
BIAN-IMes-Pd-DMS	Me-THF	K3PO4	15	14	27	24.3334	16	13	24	18	25	22	31	29
BIAN-IPr-Pd-DMS	Me-THF	K3PO4	18	17	31	19.0456	18	16	29	13	29	17	36	24
BIAN-IPr#-Pd-DMS	Me-THF	K3PO4	6	5	7	7.03533	10	6	6	4	5	5	11	10
IPrCl-Pd-DMS	Me-THF	K3PO4	36	35	57	58.839	41	37	57	57	54	55	63	66
IPentCl-Pd-DMS	Me-THF	K3PO4	72	69	86	88.0424	87	79	99	96	88	89	100	100
INonCl-Pd-DMS	Me-THF	K3PO4	24	27	67	49.3041	28	30	74	50	66	47	80	59
IPriPr-Pd-DMS	Me-THF	K3PO4	20	23	66	66.3956	28	27	76	73	66	65	81	81
IPr#-Pd-DMS	Toluene	K2CO3	48	14	3	3.44249					2	1	5	0
BIAN-IMes-Pd-DMS	Toluene	K2CO3	3	3	3	3.44249					1	1	0	2
BIAN-IPr-Pd-DMS	Toluene	K2CO3	5	3	14	3.44249					1	1	1	0
BIAN-IPr#-Pd-DMS	Toluene	K2CO3	3	3	3	3.44249					1	1	0	3
IPrCl-Pd-DMS	Toluene	K2CO3	32	27	11	5.83935					4	4	5	7
IPentCl-Pd-DMS	Toluene	K2CO3	45	41	11	9.78334					9	7	6	7
INonCl-Pd-DMS	Toluene	K2CO3	67	51	15	9.54164					13	7	11	15
IPriPr-Pd-DMS	Toluene	K2CO3	3	3	3	3.44249					1	1	0	0
IPr#-Pd-DMS	Toluene	Cs2CO3	81	83	85	70.8102					86	69	92	79
BIAN-IMes-Pd-DMS	Toluene	Cs2CO3	8	8	15	13.2488					12	10	8	11
BIAN-IPr-Pd-DMS	Toluene	Cs2CO3	26	25	26	22.4923					24	20	25	22
BIAN-IPr#-Pd-DMS	Toluene	Cs2CO3	3	3	3	3.44249					2	2	1	3
IPrCl-Pd-DMS	Toluene	Cs2CO3	55	76	66	66.9531					62	62	68	70
IPentCl-Pd-DMS	Toluene	Cs2CO3	85	87	88	76.9627					89	76	92	87
INonCl-Pd-DMS	Toluene	Cs2CO3	82	86	97						97	0	100	60
IPriPr-Pd-DMS	Toluene	Cs2CO3	81	87	96	70.5398					97	69	100	81
IPr#-Pd-DMS	Toluene	K3PO4	28	26	30	40.1735					28	37	29	40
BIAN-IMes-Pd-DMS	Toluene	K3PO4	6	6	6	6.21705					4	4	0	5
BIAN-IPr-Pd-DMS	Toluene	K3PO4	12	11	9	9.5569					6	6	3	9
BIAN-IPr#-Pd-DMS	Toluene	K3PO4	3	3	3	3.44249					1	1	2	6
IPrCl-Pd-DMS	Toluene	K3PO4	27	25	40	39.6447					35	34	31	39
IPentCl-Pd-DMS	Toluene	K3PO4	44	41	63	38.7071					62	37	63	42
INonCl-Pd-DMS	Toluene	K3PO4	38	39	69	45.1083					68	43	70	50
IPriPr-Pd-DMS	Toluene	K3PO4	9	12	17	16.9716					14	14	13	11

## Sheet: final
Catalyst	Solvent	Base	Plate	Analysis	Plating	Yield	Conversion
IPr-Pd-DMS	EtOH	K2CO3	783	UPLC	Method1	93	100
SIPr-Pd-DMS	EtOH	K2CO3	783	UPLC	Method1	93	100
IMes-Pd-DMS	EtOH	K2CO3	783	UPLC	Method1	38	36
SIMes-Pd-DMS	EtOH	K2CO3	783	UPLC	Method1	32	99
IDD-Pd-DMS	EtOH	K2CO3	783	UPLC	Method1	11	11
SIDD-Pd-DMS	EtOH	K2CO3	783	UPLC	Method1	7	3
IPr*-Pd-DMS	EtOH	K2CO3	783	UPLC	Method1	78	100
IPr*OMe-Pd-DMS	EtOH	K2CO3	783	UPLC	Method1	76	100
IPr-Pd-DMS	EtOH	Cs2CO3	783	UPLC	Method1	91	100
SIPr-Pd-DMS	EtOH	Cs2CO3	783	UPLC	Method1	19	28
IMes-Pd-DMS	EtOH	Cs2CO3	783	UPLC	Method1	35	39
SIMes-Pd-DMS	EtOH	Cs2CO3	783	UPLC	Method1	17	21
IDD-Pd-DMS	EtOH	Cs2CO3	783	UPLC	Method1	14	34
SIDD-Pd-DMS	EtOH	Cs2CO3	783	UPLC	Method1	10	25
IPr*-Pd-DMS	EtOH	Cs2CO3	783	UPLC	Method1	11	41
IPr*OMe-Pd-DMS	EtOH	Cs2CO3	783	UPLC	Method1	9	37
IPr-Pd-DMS	EtOH	K3PO4	783	UPLC	Method1	94	100
SIPr-Pd-DMS	EtOH	K3PO4	783	UPLC	Method1	84	100
IMes-Pd-DMS	EtOH	K3PO4	783	UPLC	Method1	14	13
SIMes-Pd-DMS	EtOH	K3PO4	783	UPLC	Method1	20	23
IDD-Pd-DMS	EtOH	K3PO4	783	UPLC	Method1	8	14
SIDD-Pd-DMS	EtOH	K3PO4	783	UPLC	Method1	8	15
IPr*-Pd-DMS	EtOH	K3PO4	783	UPLC	Method1	37	100
IPr*OMe-Pd-DMS	EtOH	K3PO4	783	UPLC	Method1	30	100
IPr-Pd-DMS	iPrOAc	K2CO3	783	UPLC	Method1	30	30
SIPr-Pd-DMS	iPrOAc	K2CO3	783	UPLC	Method1	16	16
IMes-Pd-DMS	iPrOAc	K2CO3	783	UPLC	Method1	15	22
SIMes-Pd-DMS	iPrOAc	K2CO3	783	UPLC	Method1	9	11
IDD-Pd-DMS	iPrOAc	K2CO3	783	UPLC	Method1	5	1
SIDD-Pd-DMS	iPrOAc	K2CO3	783	UPLC	Method1	12	13
IPr*-Pd-DMS	iPrOAc	K2CO3	783	UPLC	Method1	26	33
IPr*OMe-Pd-DMS	iPrOAc	K2CO3	783	UPLC	Method1	23	25
IPr-Pd-DMS	iPrOAc	Cs2CO3	783	UPLC	Method1	92	100
SIPr-Pd-DMS	iPrOAc	Cs2CO3	783	UPLC	Method1	87	98
IMes-Pd-DMS	iPrOAc	Cs2CO3	783	UPLC	Method1	44	50
SIMes-Pd-DMS	iPrOAc	Cs2CO3	783	UPLC	Method1	38	44
IDD-Pd-DMS	iPrOAc	Cs2CO3	783	UPLC	Method1	7	6
SIDD-Pd-DMS	iPrOAc	Cs2CO3	783	UPLC	Method1	45	52
IPr*-Pd-DMS	iPrOAc	Cs2CO3	783	UPLC	Method1	43	51
IPr*OMe-Pd-DMS	iPrOAc	Cs2CO3	783	UPLC	Method1	46	56
IPr-Pd-DMS	iPrOAc	K3PO4	783	UPLC	Method1	93	98
SIPr-Pd-DMS	iPrOAc	K3PO4	783	UPLC	Method1	45	53
IMes-Pd-DMS	iPrOAc	K3PO4	783	UPLC	Method1	40	48
SIMes-Pd-DMS	iPrOAc	K3PO4	783	UPLC	Method1	32	31
IDD-Pd-DMS	iPrOAc	K3PO4	783	UPLC	Method1	11	12
SIDD-Pd-DMS	iPrOAc	K3PO4	783	UPLC	Method1	40	46
IPr*-Pd-DMS	iPrOAc	K3PO4	783	UPLC	Method1	33	42
IPr*OMe-Pd-DMS	iPrOAc	K3PO4	783	UPLC	Method1	22	26
IPr-Pd-DMS	Me-THF	K2CO3	783	UPLC	Method1	15	7
SIPr-Pd-DMS	Me-THF	K2CO3	783	UPLC	Method1	8	4
IMes-Pd-DMS	Me-THF	K2CO3	783	UPLC	Method1	8	1
SIMes-Pd-DMS	Me-THF	K2CO3	783	UPLC	Method1	5	0
IDD-Pd-DMS	Me-THF	K2CO3	783	UPLC	Method1	3	0
SIDD-Pd-DMS	Me-THF	K2CO3	783	UPLC	Method1	8	0
IPr*-Pd-DMS	Me-THF	K2CO3	783	UPLC	Method1	16	15
IPr*OMe-Pd-DMS	Me-THF	K2CO3	783	UPLC	Method1	13	10
IPr-Pd-DMS	Me-THF	Cs2CO3	783	UPLC	Method1	95	100
SIPr-Pd-DMS	Me-THF	Cs2CO3	783	UPLC	Method1	94	97
IMes-Pd-DMS	Me-THF	Cs2CO3	783	UPLC	Method1	63	62
SIMes-Pd-DMS	Me-THF	Cs2CO3	783	UPLC	Method1	27	24
IDD-Pd-DMS	Me-THF	Cs2CO3	783	UPLC	Method1	7	1
SIDD-Pd-DMS	Me-THF	Cs2CO3	783	UPLC	Method1	24	20
IPr*-Pd-DMS	Me-THF	Cs2CO3	783	UPLC	Method1	20	16
IPr*OMe-Pd-DMS	Me-THF	Cs2CO3	783	UPLC	Method1	29	26
IPr-Pd-DMS	Me-THF	K3PO4	783	UPLC	Method1	55	55
SIPr-Pd-DMS	Me-THF	K3PO4	783	UPLC	Method1	30	32
IMes-Pd-DMS	Me-THF	K3PO4	783	UPLC	Method1	20	18
SIMes-Pd-DMS	Me-THF	K3PO4	783	UPLC	Method1	13	9
IDD-Pd-DMS	Me-THF	K3PO4	783	UPLC	Method1	5	0
SIDD-Pd-DMS	Me-THF	K3PO4	783	UPLC	Method1	13	5
IPr*-Pd-DMS	Me-THF	K3PO4	783	UPLC	Method1	18	14
IPr*OMe-Pd-DMS	Me-THF	K3PO4	783	UPLC	Method1	12	5
IPr-Pd-DMS	Toluene	K2CO3	783	UPLC	Method1	11
SIPr-Pd-DMS	Toluene	K2CO3	783	UPLC	Method1	7
IMes-Pd-DMS	Toluene	K2CO3	783	UPLC	Method1	3
SIMes-Pd-DMS	Toluene	K2CO3	783	UPLC	Method1	3
IDD-Pd-DMS	Toluene	K2CO3	783	UPLC	Method1	3
SIDD-Pd-DMS	Toluene	K2CO3	783	UPLC	Method1	3
IPr*-Pd-DMS	Toluene	K2CO3	783	UPLC	Method1	21
IPr*OMe-Pd-DMS	Toluene	K2CO3	783	UPLC	Method1	19
IPr-Pd-DMS	Toluene	Cs2CO3	783	UPLC	Method1	73
SIPr-Pd-DMS	Toluene	Cs2CO3	783	UPLC	Method1	57
IMes-Pd-DMS	Toluene	Cs2CO3	783	UPLC	Method1	13
SIMes-Pd-DMS	Toluene	Cs2CO3	783	UPLC	Method1	15
IDD-Pd-DMS	Toluene	Cs2CO3	783	UPLC	Method1	3
SIDD-Pd-DMS	Toluene	Cs2CO3	783	UPLC	Method1	6
IPr*-Pd-DMS	Toluene	Cs2CO3	783	UPLC	Method1	91
IPr*OMe-Pd-DMS	Toluene	Cs2CO3	783	UPLC	Method1	84
IPr-Pd-DMS	Toluene	K3PO4	783	UPLC	Method1	23
SIPr-Pd-DMS	Toluene	K3PO4	783	UPLC	Method1	20
IMes-Pd-DMS	Toluene	K3PO4	783	UPLC	Method1	15
SIMes-Pd-DMS	Toluene	K3PO4	783	UPLC	Method1	9
IDD-Pd-DMS	Toluene	K3PO4	783	UPLC	Method1	3
SIDD-Pd-DMS	Toluene	K3PO4	783	UPLC	Method1	5
IPr*-Pd-DMS	Toluene	K3PO4	783	UPLC	Method1	19
IPr*OMe-Pd-DMS	Toluene	K3PO4	783	UPLC	Method1	15
IPr-Pd-DMS	EtOH	K2CO3	783bis	UPLC	Method1	85	100
SIPr-Pd-DMS	EtOH	K2CO3	783bis	UPLC	Method1	84	100
IMes-Pd-DMS	EtOH	K2CO3	783bis	UPLC	Method1	39	44
SIMes-Pd-DMS	EtOH	K2CO3	783bis	UPLC	Method1	31	40
IDD-Pd-DMS	EtOH	K2CO3	783bis	UPLC	Method1	10	27
SIDD-Pd-DMS	EtOH	K2CO3	783bis	UPLC	Method1	7	12
IPr*-Pd-DMS	EtOH	K2CO3	783bis	UPLC	Method1	71	100
IPr*OMe-Pd-DMS	EtOH	K2CO3	783bis	UPLC	Method1	77	100
IPr-Pd-DMS	EtOH	Cs2CO3	783bis	UPLC	Method1	77	100
SIPr-Pd-DMS	EtOH	Cs2CO3	783bis	UPLC	Method1	17	33
IMes-Pd-DMS	EtOH	Cs2CO3	783bis	UPLC	Method1	42	54
SIMes-Pd-DMS	EtOH	Cs2CO3	783bis	UPLC	Method1	17	29
IDD-Pd-DMS	EtOH	Cs2CO3	783bis	UPLC	Method1	15	50
SIDD-Pd-DMS	EtOH	Cs2CO3	783bis	UPLC	Method1	10	29
IPr*-Pd-DMS	EtOH	Cs2CO3	783bis	UPLC	Method1	10	44
IPr*OMe-Pd-DMS	EtOH	Cs2CO3	783bis	UPLC	Method1	9	38
IPr-Pd-DMS	EtOH	K3PO4	783bis	UPLC	Method1	88	100
SIPr-Pd-DMS	EtOH	K3PO4	783bis	UPLC	Method1	77	100
IMes-Pd-DMS	EtOH	K3PO4	783bis	UPLC	Method1	16	20
SIMes-Pd-DMS	EtOH	K3PO4	783bis	UPLC	Method1	19	27
IDD-Pd-DMS	EtOH	K3PO4	783bis	UPLC	Method1	8	22
SIDD-Pd-DMS	EtOH	K3PO4	783bis	UPLC	Method1	8	19
IPr*-Pd-DMS	EtOH	K3PO4	783bis	UPLC	Method1	35	100
IPr*OMe-Pd-DMS	EtOH	K3PO4	783bis	UPLC	Method1	37	100
IPr-Pd-DMS	iPrOAc	K2CO3	783bis	UPLC	Method1	30	33
SIPr-Pd-DMS	iPrOAc	K2CO3	783bis	UPLC	Method1	17	19
IMes-Pd-DMS	iPrOAc	K2CO3	783bis	UPLC	Method1	15	22
SIMes-Pd-DMS	iPrOAc	K2CO3	783bis	UPLC	Method1	10	11
IDD-Pd-DMS	iPrOAc	K2CO3	783bis	UPLC	Method1	5	4
SIDD-Pd-DMS	iPrOAc	K2CO3	783bis	UPLC	Method1	9	10
IPr*-Pd-DMS	iPrOAc	K2CO3	783bis	UPLC	Method1	27	31
IPr*OMe-Pd-DMS	iPrOAc	K2CO3	783bis	UPLC	Method1	23	29
IPr-Pd-DMS	iPrOAc	Cs2CO3	783bis	UPLC	Method1	88	100
SIPr-Pd-DMS	iPrOAc	Cs2CO3	783bis	UPLC	Method1	80	94
IMes-Pd-DMS	iPrOAc	Cs2CO3	783bis	UPLC	Method1	55	64
SIMes-Pd-DMS	iPrOAc	Cs2CO3	783bis	UPLC	Method1	51	58
IDD-Pd-DMS	iPrOAc	Cs2CO3	783bis	UPLC	Method1	7	18
SIDD-Pd-DMS	iPrOAc	Cs2CO3	783bis	UPLC	Method1	51	65
IPr*-Pd-DMS	iPrOAc	Cs2CO3	783bis	UPLC	Method1	40	58
IPr*OMe-Pd-DMS	iPrOAc	Cs2CO3	783bis	UPLC	Method1	42	51
IPr-Pd-DMS	iPrOAc	K3PO4	783bis	UPLC	Method1	81	93
SIPr-Pd-DMS	iPrOAc	K3PO4	783bis	UPLC	Method1	43	49
IMes-Pd-DMS	iPrOAc	K3PO4	783bis	UPLC	Method1	42	50
SIMes-Pd-DMS	iPrOAc	K3PO4	783bis	UPLC	Method1	31	36
IDD-Pd-DMS	iPrOAc	K3PO4	783bis	UPLC	Method1	9	10
SIDD-Pd-DMS	iPrOAc	K3PO4	783bis	UPLC	Method1	41	49
IPr*-Pd-DMS	iPrOAc	K3PO4	783bis	UPLC	Method1	30	43
IPr*OMe-Pd-DMS	iPrOAc	K3PO4	783bis	UPLC	Method1	20	23
IPr-Pd-DMS	Me-THF	K2CO3	783bis	UPLC	Method1	16	15
SIPr-Pd-DMS	Me-THF	K2CO3	783bis	UPLC	Method1	9	8
IMes-Pd-DMS	Me-THF	K2CO3	783bis	UPLC	Method1	9	7
SIMes-Pd-DMS	Me-THF	K2CO3	783bis	UPLC	Method1	5	3
IDD-Pd-DMS	Me-THF	K2CO3	783bis	UPLC	Method1	3	2
SIDD-Pd-DMS	Me-THF	K2CO3	783bis	UPLC	Method1	8	8
IPr*-Pd-DMS	Me-THF	K2CO3	783bis	UPLC	Method1	18	20
IPr*OMe-Pd-DMS	Me-THF	K2CO3	783bis	UPLC	Method1	16	15
IPr-Pd-DMS	Me-THF	Cs2CO3	783bis	UPLC	Method1	90	100
SIPr-Pd-DMS	Me-THF	Cs2CO3	783bis	UPLC	Method1	79	89
IMes-Pd-DMS	Me-THF	Cs2CO3	783bis	UPLC	Method1	55	60
SIMes-Pd-DMS	Me-THF	Cs2CO3	783bis	UPLC	Method1	28	29
IDD-Pd-DMS	Me-THF	Cs2CO3	783bis	UPLC	Method1	9	7
SIDD-Pd-DMS	Me-THF	Cs2CO3	783bis	UPLC	Method1	19	19
IPr*-Pd-DMS	Me-THF	Cs2CO3	783bis	UPLC	Method1	31	35
IPr*OMe-Pd-DMS	Me-THF	Cs2CO3	783bis	UPLC	Method1	28	29
IPr-Pd-DMS	Me-THF	K3PO4	783bis	UPLC	Method1	58	65
SIPr-Pd-DMS	Me-THF	K3PO4	783bis	UPLC	Method1	31	35
IMes-Pd-DMS	Me-THF	K3PO4	783bis	UPLC	Method1	28	30
SIMes-Pd-DMS	Me-THF	K3PO4	783bis	UPLC	Method1	19	18
IDD-Pd-DMS	Me-THF	K3PO4	783bis	UPLC	Method1	5	3
SIDD-Pd-DMS	Me-THF	K3PO4	783bis	UPLC	Method1	11	8
IPr*-Pd-DMS	Me-THF	K3PO4	783bis	UPLC	Method1	19	19
IPr*OMe-Pd-DMS	Me-THF	K3PO4	783bis	UPLC	Method1	13	14
IPr-Pd-DMS	Toluene	K2CO3	783bis	UPLC	Method1	12
SIPr-Pd-DMS	Toluene	K2CO3	783bis	UPLC	Method1	7
IMes-Pd-DMS	Toluene	K2CO3	783bis	UPLC	Method1	3
SIMes-Pd-DMS	Toluene	K2CO3	783bis	UPLC	Method1	3
IDD-Pd-DMS	Toluene	K2CO3	783bis	UPLC	Method1	3
SIDD-Pd-DMS	Toluene	K2CO3	783bis	UPLC	Method1	3
IPr*-Pd-DMS	Toluene	K2CO3	783bis	UPLC	Method1	21
IPr*OMe-Pd-DMS	Toluene	K2CO3	783bis	UPLC	Method1	19
IPr-Pd-DMS	Toluene	Cs2CO3	783bis	UPLC	Method1	64
SIPr-Pd-DMS	Toluene	Cs2CO3	783bis	UPLC	Method1	47
IMes-Pd-DMS	Toluene	Cs2CO3	783bis	UPLC	Method1	15
SIMes-Pd-DMS	Toluene	Cs2CO3	783bis	UPLC	Method1	16
IDD-Pd-DMS	Toluene	Cs2CO3	783bis	UPLC	Method1	3
SIDD-Pd-DMS	Toluene	Cs2CO3	783bis	UPLC	Method1	7
IPr*-Pd-DMS	Toluene	Cs2CO3	783bis	UPLC	Method1	85
IPr*OMe-Pd-DMS	Toluene	Cs2CO3	783bis	UPLC	Method1	67
IPr-Pd-DMS	Toluene	K3PO4	783bis	UPLC	Method1	20
SIPr-Pd-DMS	Toluene	K3PO4	783bis	UPLC	Method1	13
IMes-Pd-DMS	Toluene	K3PO4	783bis	UPLC	Method1	13
SIMes-Pd-DMS	Toluene	K3PO4	783bis	UPLC	Method1	8
IDD-Pd-DMS	Toluene	K3PO4	783bis	UPLC	Method1	3
SIDD-Pd-DMS	Toluene	K3PO4	783bis	UPLC	Method1	6
IPr*-Pd-DMS	Toluene	K3PO4	783bis	UPLC	Method1	20
IPr*OMe-Pd-DMS	Toluene	K3PO4	783bis	UPLC	Method1	15
IPr-Pd-DMS	EtOH	K2CO3	797	UPLC	Method2	69	100
SIPr-Pd-DMS	EtOH	K2CO3	797	UPLC	Method2	86	100
IMes-Pd-DMS	EtOH	K2CO3	797	UPLC	Method2	41	41
SIMes-Pd-DMS	EtOH	K2CO3	797	UPLC	Method2	31	43
IDD-Pd-DMS	EtOH	K2CO3	797	UPLC	Method2	11	28
SIDD-Pd-DMS	EtOH	K2CO3	797	UPLC	Method2	6	6
IPr*-Pd-DMS	EtOH	K2CO3	797	UPLC	Method2	72	100
IPr*OMe-Pd-DMS	EtOH	K2CO3	797	UPLC	Method2	63	100
IPr-Pd-DMS	EtOH	Cs2CO3	797	UPLC	Method2	73	90
SIPr-Pd-DMS	EtOH	Cs2CO3	797	UPLC	Method2	10	19
IMes-Pd-DMS	EtOH	Cs2CO3	797	UPLC	Method2	33	35
SIMes-Pd-DMS	EtOH	Cs2CO3	797	UPLC	Method2	11	12
IDD-Pd-DMS	EtOH	Cs2CO3	797	UPLC	Method2	13	34
SIDD-Pd-DMS	EtOH	Cs2CO3	797	UPLC	Method2	8	16
IPr*-Pd-DMS	EtOH	Cs2CO3	797	UPLC	Method2	7	32
IPr*OMe-Pd-DMS	EtOH	Cs2CO3	797	UPLC	Method2	6	36
IPr-Pd-DMS	EtOH	K3PO4	797	UPLC	Method2	93	100
SIPr-Pd-DMS	EtOH	K3PO4	797	UPLC	Method2	82	100
IMes-Pd-DMS	EtOH	K3PO4	797	UPLC	Method2	31	32
SIMes-Pd-DMS	EtOH	K3PO4	797	UPLC	Method2	29	32
IDD-Pd-DMS	EtOH	K3PO4	797	UPLC	Method2	10	17
SIDD-Pd-DMS	EtOH	K3PO4	797	UPLC	Method2	9	16
IPr*-Pd-DMS	EtOH	K3PO4	797	UPLC	Method2	40	100
IPr*OMe-Pd-DMS	EtOH	K3PO4	797	UPLC	Method2	48	100
IPr-Pd-DMS	iPrOAc	K2CO3	797	UPLC	Method2	14	16
SIPr-Pd-DMS	iPrOAc	K2CO3	797	UPLC	Method2	9	11
IMes-Pd-DMS	iPrOAc	K2CO3	797	UPLC	Method2	12	13
SIMes-Pd-DMS	iPrOAc	K2CO3	797	UPLC	Method2	8	4
IDD-Pd-DMS	iPrOAc	K2CO3	797	UPLC	Method2	5	0
SIDD-Pd-DMS	iPrOAc	K2CO3	797	UPLC	Method2	9	3
IPr*-Pd-DMS	iPrOAc	K2CO3	797	UPLC	Method2	11	5
IPr*OMe-Pd-DMS	iPrOAc	K2CO3	797	UPLC	Method2	10	5
IPr-Pd-DMS	iPrOAc	Cs2CO3	797	UPLC	Method2	94	100
SIPr-Pd-DMS	iPrOAc	Cs2CO3	797	UPLC	Method2	86	95
IMes-Pd-DMS	iPrOAc	Cs2CO3	797	UPLC	Method2	48	47
SIMes-Pd-DMS	iPrOAc	Cs2CO3	797	UPLC	Method2	42	46
IDD-Pd-DMS	iPrOAc	Cs2CO3	797	UPLC	Method2	21	19
SIDD-Pd-DMS	iPrOAc	Cs2CO3	797	UPLC	Method2	57	62
IPr*-Pd-DMS	iPrOAc	Cs2CO3	797	UPLC	Method2	27	25
IPr*OMe-Pd-DMS	iPrOAc	Cs2CO3	797	UPLC	Method2	18	15
IPr-Pd-DMS	iPrOAc	K3PO4	797	UPLC	Method2	74	76
SIPr-Pd-DMS	iPrOAc	K3PO4	797	UPLC	Method2	40	39
IMes-Pd-DMS	iPrOAc	K3PO4	797	UPLC	Method2	32	32
SIMes-Pd-DMS	iPrOAc	K3PO4	797	UPLC	Method2	25	22
IDD-Pd-DMS	iPrOAc	K3PO4	797	UPLC	Method2	7	7
SIDD-Pd-DMS	iPrOAc	K3PO4	797	UPLC	Method2	31	38
IPr*-Pd-DMS	iPrOAc	K3PO4	797	UPLC	Method2	45	50
IPr*OMe-Pd-DMS	iPrOAc	K3PO4	797	UPLC	Method2	39	46
IPr-Pd-DMS	Me-THF	K2CO3	797	UPLC	Method2	10	3
SIPr-Pd-DMS	Me-THF	K2CO3	797	UPLC	Method2	6	4
IMes-Pd-DMS	Me-THF	K2CO3	797	UPLC	Method2	5	0
SIMes-Pd-DMS	Me-THF	K2CO3	797	UPLC	Method2	3	0
IDD-Pd-DMS	Me-THF	K2CO3	797	UPLC	Method2	3	0
SIDD-Pd-DMS	Me-THF	K2CO3	797	UPLC	Method2	5	0
IPr*-Pd-DMS	Me-THF	K2CO3	797	UPLC	Method2	6	0
IPr*OMe-Pd-DMS	Me-THF	K2CO3	797	UPLC	Method2	6	1
IPr-Pd-DMS	Me-THF	Cs2CO3	797	UPLC	Method2	93	100
SIPr-Pd-DMS	Me-THF	Cs2CO3	797	UPLC	Method2	68	76
IMes-Pd-DMS	Me-THF	Cs2CO3	797	UPLC	Method2	44	43
SIMes-Pd-DMS	Me-THF	Cs2CO3	797	UPLC	Method2	27	26
IDD-Pd-DMS	Me-THF	Cs2CO3	797	UPLC	Method2	12	13
SIDD-Pd-DMS	Me-THF	Cs2CO3	797	UPLC	Method2	27	31
IPr*-Pd-DMS	Me-THF	Cs2CO3	797	UPLC	Method2	13	8
IPr*OMe-Pd-DMS	Me-THF	Cs2CO3	797	UPLC	Method2	11	9
IPr-Pd-DMS	Me-THF	K3PO4	797	UPLC	Method2	47	46
SIPr-Pd-DMS	Me-THF	K3PO4	797	UPLC	Method2	27	28
IMes-Pd-DMS	Me-THF	K3PO4	797	UPLC	Method2	23	22
SIMes-Pd-DMS	Me-THF	K3PO4	797	UPLC	Method2	17	16
IDD-Pd-DMS	Me-THF	K3PO4	797	UPLC	Method2	5	0
SIDD-Pd-DMS	Me-THF	K3PO4	797	UPLC	Method2	11	7
IPr*-Pd-DMS	Me-THF	K3PO4	797	UPLC	Method2	35	37
IPr*OMe-Pd-DMS	Me-THF	K3PO4	797	UPLC	Method2	27	26
IPr-Pd-DMS	Toluene	K2CO3	797	UPLC	Method2	10
SIPr-Pd-DMS	Toluene	K2CO3	797	UPLC	Method2	5
IMes-Pd-DMS	Toluene	K2CO3	797	UPLC	Method2	3
SIMes-Pd-DMS	Toluene	K2CO3	797	UPLC	Method2	3
IDD-Pd-DMS	Toluene	K2CO3	797	UPLC	Method2	3
SIDD-Pd-DMS	Toluene	K2CO3	797	UPLC	Method2	3
IPr*-Pd-DMS	Toluene	K2CO3	797	UPLC	Method2	9
IPr*OMe-Pd-DMS	Toluene	K2CO3	797	UPLC	Method2	9
IPr-Pd-DMS	Toluene	Cs2CO3	797	UPLC	Method2	82
SIPr-Pd-DMS	Toluene	Cs2CO3	797	UPLC	Method2	59
IMes-Pd-DMS	Toluene	Cs2CO3	797	UPLC	Method2	21
SIMes-Pd-DMS	Toluene	Cs2CO3	797	UPLC	Method2	17
IDD-Pd-DMS	Toluene	Cs2CO3	797	UPLC	Method2	3
SIDD-Pd-DMS	Toluene	Cs2CO3	797	UPLC	Method2	9
IPr*-Pd-DMS	Toluene	Cs2CO3	797	UPLC	Method2	28
IPr*OMe-Pd-DMS	Toluene	Cs2CO3	797	UPLC	Method2	8
IPr-Pd-DMS	Toluene	K3PO4	797	UPLC	Method2	19
SIPr-Pd-DMS	Toluene	K3PO4	797	UPLC	Method2	10
IMes-Pd-DMS	Toluene	K3PO4	797	UPLC	Method2	11
SIMes-Pd-DMS	Toluene	K3PO4	797	UPLC	Method2	6
IDD-Pd-DMS	Toluene	K3PO4	797	UPLC	Method2	3
SIDD-Pd-DMS	Toluene	K3PO4	797	UPLC	Method2	3
IPr*-Pd-DMS	Toluene	K3PO4	797	UPLC	Method2	27
IPr*OMe-Pd-DMS	Toluene	K3PO4	797	UPLC	Method2	22
IPr-Pd-DMS	EtOH	K2CO3	825	UPLC	Method2	64	100
SIPr-Pd-DMS	EtOH	K2CO3	825	UPLC	Method2	93	100
IMes-Pd-DMS	EtOH	K2CO3	825	UPLC	Method2	40	48
SIMes-Pd-DMS	EtOH	K2CO3	825	UPLC	Method2	33	44
IDD-Pd-DMS	EtOH	K2CO3	825	UPLC	Method2	9	15
SIDD-Pd-DMS	EtOH	K2CO3	825	UPLC	Method2	5	9
IPr*-Pd-DMS	EtOH	K2CO3	825	UPLC	Method2	67	100
IPr*OMe-Pd-DMS	EtOH	K2CO3	825	UPLC	Method2	67	100
IPr-Pd-DMS	EtOH	Cs2CO3	825	UPLC	Method2	71	92
SIPr-Pd-DMS	EtOH	Cs2CO3	825	UPLC	Method2	10	18
IMes-Pd-DMS	EtOH	Cs2CO3	825	UPLC	Method2	39	45
SIMes-Pd-DMS	EtOH	Cs2CO3	825	UPLC	Method2	11	19
IDD-Pd-DMS	EtOH	Cs2CO3	825	UPLC	Method2	13	38
SIDD-Pd-DMS	EtOH	Cs2CO3	825	UPLC	Method2	8	24
IPr*-Pd-DMS	EtOH	Cs2CO3	825	UPLC	Method2	7	31
IPr*OMe-Pd-DMS	EtOH	Cs2CO3	825	UPLC	Method2	14	29
IPr-Pd-DMS	EtOH	K3PO4	825	UPLC	Method2	91	100
SIPr-Pd-DMS	EtOH	K3PO4	825	UPLC	Method2	84	100
IMes-Pd-DMS	EtOH	K3PO4	825	UPLC	Method2	31	34
SIMes-Pd-DMS	EtOH	K3PO4	825	UPLC	Method2	34	43
IDD-Pd-DMS	EtOH	K3PO4	825	UPLC	Method2	12	18
SIDD-Pd-DMS	EtOH	K3PO4	825	UPLC	Method2	8	13
IPr*-Pd-DMS	EtOH	K3PO4	825	UPLC	Method2	47	100
IPr*OMe-Pd-DMS	EtOH	K3PO4	825	UPLC	Method2	51	100
IPr-Pd-DMS	iPrOAc	K2CO3	825	UPLC	Method2	13	10
SIPr-Pd-DMS	iPrOAc	K2CO3	825	UPLC	Method2	8	6
IMes-Pd-DMS	iPrOAc	K2CO3	825	UPLC	Method2	11	21
SIMes-Pd-DMS	iPrOAc	K2CO3	825	UPLC	Method2	6	19
IDD-Pd-DMS	iPrOAc	K2CO3	825	UPLC	Method2	3	5
SIDD-Pd-DMS	iPrOAc	K2CO3	825	UPLC	Method2	7	5
IPr*-Pd-DMS	iPrOAc	K2CO3	825	UPLC	Method2	5	9
IPr*OMe-Pd-DMS	iPrOAc	K2CO3	825	UPLC	Method2	8	5
IPr-Pd-DMS	iPrOAc	Cs2CO3	825	UPLC	Method2	89	100
SIPr-Pd-DMS	iPrOAc	Cs2CO3	825	UPLC	Method2	84	96
IMes-Pd-DMS	iPrOAc	Cs2CO3	825	UPLC	Method2	49	54
SIMes-Pd-DMS	iPrOAc	Cs2CO3	825	UPLC	Method2	38	40
IDD-Pd-DMS	iPrOAc	Cs2CO3	825	UPLC	Method2	20	23
SIDD-Pd-DMS	iPrOAc	Cs2CO3	825	UPLC	Method2	53	61
IPr*-Pd-DMS	iPrOAc	Cs2CO3	825	UPLC	Method2	25	25
IPr*OMe-Pd-DMS	iPrOAc	Cs2CO3	825	UPLC	Method2	17	27
IPr-Pd-DMS	iPrOAc	K3PO4	825	UPLC	Method2	62	68
SIPr-Pd-DMS	iPrOAc	K3PO4	825	UPLC	Method2	35	37
IMes-Pd-DMS	iPrOAc	K3PO4	825	UPLC	Method2	37	43
SIMes-Pd-DMS	iPrOAc	K3PO4	825	UPLC	Method2	29	30
IDD-Pd-DMS	iPrOAc	K3PO4	825	UPLC	Method2	10	8
SIDD-Pd-DMS	iPrOAc	K3PO4	825	UPLC	Method2	27	29
IPr*-Pd-DMS	iPrOAc	K3PO4	825	UPLC	Method2	22	22
IPr*OMe-Pd-DMS	iPrOAc	K3PO4	825	UPLC	Method2	13	18
IPr-Pd-DMS	Me-THF	K2CO3	825	UPLC	Method2	7	0
SIPr-Pd-DMS	Me-THF	K2CO3	825	UPLC	Method2	5	0
IMes-Pd-DMS	Me-THF	K2CO3	825	UPLC	Method2	5	3
SIMes-Pd-DMS	Me-THF	K2CO3	825	UPLC	Method2	3	1
IDD-Pd-DMS	Me-THF	K2CO3	825	UPLC	Method2	3	0
SIDD-Pd-DMS	Me-THF	K2CO3	825	UPLC	Method2	5	0
IPr*-Pd-DMS	Me-THF	K2CO3	825	UPLC	Method2	5	2
IPr*OMe-Pd-DMS	Me-THF	K2CO3	825	UPLC	Method2	5	5
IPr-Pd-DMS	Me-THF	Cs2CO3	825	UPLC	Method2	91	100
SIPr-Pd-DMS	Me-THF	Cs2CO3	825	UPLC	Method2	66	70
IMes-Pd-DMS	Me-THF	Cs2CO3	825	UPLC	Method2	41	40
SIMes-Pd-DMS	Me-THF	Cs2CO3	825	UPLC	Method2	25	23
IDD-Pd-DMS	Me-THF	Cs2CO3	825	UPLC	Method2	13	11
SIDD-Pd-DMS	Me-THF	Cs2CO3	825	UPLC	Method2	36	40
IPr*-Pd-DMS	Me-THF	Cs2CO3	825	UPLC	Method2	10	9
IPr*OMe-Pd-DMS	Me-THF	Cs2CO3	825	UPLC	Method2	15	20
IPr-Pd-DMS	Me-THF	K3PO4	825	UPLC	Method2	35	35
SIPr-Pd-DMS	Me-THF	K3PO4	825	UPLC	Method2	26	21
IMes-Pd-DMS	Me-THF	K3PO4	825	UPLC	Method2	23	23
SIMes-Pd-DMS	Me-THF	K3PO4	825	UPLC	Method2	16	14
IDD-Pd-DMS	Me-THF	K3PO4	825	UPLC	Method2	5	0
SIDD-Pd-DMS	Me-THF	K3PO4	825	UPLC	Method2	14	13
IPr*-Pd-DMS	Me-THF	K3PO4	825	UPLC	Method2	21	19
IPr*OMe-Pd-DMS	Me-THF	K3PO4	825	UPLC	Method2	15	14
IPr-Pd-DMS	Toluene	K2CO3	825	UPLC	Method2	3
SIPr-Pd-DMS	Toluene	K2CO3	825	UPLC	Method2	3
IMes-Pd-DMS	Toluene	K2CO3	825	UPLC	Method2	3
SIMes-Pd-DMS	Toluene	K2CO3	825	UPLC	Method2	3
IDD-Pd-DMS	Toluene	K2CO3	825	UPLC	Method2	3
SIDD-Pd-DMS	Toluene	K2CO3	825	UPLC	Method2	3
IPr*-Pd-DMS	Toluene	K2CO3	825	UPLC	Method2	3
IPr*OMe-Pd-DMS	Toluene	K2CO3	825	UPLC	Method2	3
IPr-Pd-DMS	Toluene	Cs2CO3	825	UPLC	Method2	48
SIPr-Pd-DMS	Toluene	Cs2CO3	825	UPLC	Method2	29
IMes-Pd-DMS	Toluene	Cs2CO3	825	UPLC	Method2	22
SIMes-Pd-DMS	Toluene	Cs2CO3	825	UPLC	Method2	17
IDD-Pd-DMS	Toluene	Cs2CO3	825	UPLC	Method2	3
SIDD-Pd-DMS	Toluene	Cs2CO3	825	UPLC	Method2	9
IPr*-Pd-DMS	Toluene	Cs2CO3	825	UPLC	Method2	16
IPr*OMe-Pd-DMS	Toluene	Cs2CO3	825	UPLC	Method2	16
IPr-Pd-DMS	Toluene	K3PO4	825	UPLC	Method2	12
SIPr-Pd-DMS	Toluene	K3PO4	825	UPLC	Method2	9
IMes-Pd-DMS	Toluene	K3PO4	825	UPLC	Method2	11
SIMes-Pd-DMS	Toluene	K3PO4	825	UPLC	Method2	3
IDD-Pd-DMS	Toluene	K3PO4	825	UPLC	Method2	3
SIDD-Pd-DMS	Toluene	K3PO4	825	UPLC	Method2	3
IPr*-Pd-DMS	Toluene	K3PO4	825	UPLC	Method2	12
IPr*OMe-Pd-DMS	Toluene	K3PO4	825	UPLC	Method2	8
IPr-Pd-DMS	EtOH	K2CO3	826	UPLC	Method2	90	100
SIPr-Pd-DMS	EtOH	K2CO3	826	UPLC	Method2	87	100
IMes-Pd-DMS	EtOH	K2CO3	826	UPLC	Method2	44	49
SIMes-Pd-DMS	EtOH	K2CO3	826	UPLC	Method2	40	45
IDD-Pd-DMS	EtOH	K2CO3	826	UPLC	Method2	9	16
SIDD-Pd-DMS	EtOH	K2CO3	826	UPLC	Method2	6	8
IPr*-Pd-DMS	EtOH	K2CO3	826	UPLC	Method2	72	100
IPr*OMe-Pd-DMS	EtOH	K2CO3	826	UPLC	Method2	67	100
IPr-Pd-DMS	EtOH	Cs2CO3	826	UPLC	Method2	83	100
SIPr-Pd-DMS	EtOH	Cs2CO3	826	UPLC	Method2	17	27
IMes-Pd-DMS	EtOH	Cs2CO3	826	UPLC	Method2	54	65
SIMes-Pd-DMS	EtOH	Cs2CO3	826	UPLC	Method2	19	31
IDD-Pd-DMS	EtOH	Cs2CO3	826	UPLC	Method2	16	41
SIDD-Pd-DMS	EtOH	Cs2CO3	826	UPLC	Method2	12	34
IPr*-Pd-DMS	EtOH	Cs2CO3	826	UPLC	Method2	12	44
IPr*OMe-Pd-DMS	EtOH	Cs2CO3	826	UPLC	Method2	9	37
IPr-Pd-DMS	EtOH	K3PO4	826	UPLC	Method2	3	0
SIPr-Pd-DMS	EtOH	K3PO4	826	UPLC	Method2	82	100
IMes-Pd-DMS	EtOH	K3PO4	826	UPLC	Method2	25	28
SIMes-Pd-DMS	EtOH	K3PO4	826	UPLC	Method2	32	39
IDD-Pd-DMS	EtOH	K3PO4	826	UPLC	Method2	9	17
SIDD-Pd-DMS	EtOH	K3PO4	826	UPLC	Method2	8	15
IPr*-Pd-DMS	EtOH	K3PO4	826	UPLC	Method2	50	100
IPr*OMe-Pd-DMS	EtOH	K3PO4	826	UPLC	Method2	49	100
IPr-Pd-DMS	iPrOAc	K2CO3	826	UPLC	Method2	26	32
SIPr-Pd-DMS	iPrOAc	K2CO3	826	UPLC	Method2	12	14
IMes-Pd-DMS	iPrOAc	K2CO3	826	UPLC	Method2	14	27
SIMes-Pd-DMS	iPrOAc	K2CO3	826	UPLC	Method2	8	12
IDD-Pd-DMS	iPrOAc	K2CO3	826	UPLC	Method2	5	4
SIDD-Pd-DMS	iPrOAc	K2CO3	826	UPLC	Method2	10	10
IPr*-Pd-DMS	iPrOAc	K2CO3	826	UPLC	Method2	21	21
IPr*OMe-Pd-DMS	iPrOAc	K2CO3	826	UPLC	Method2	17	18
IPr-Pd-DMS	iPrOAc	Cs2CO3	826	UPLC	Method2	85	100
SIPr-Pd-DMS	iPrOAc	Cs2CO3	826	UPLC	Method2	85	100
IMes-Pd-DMS	iPrOAc	Cs2CO3	826	UPLC	Method2	67	77
SIMes-Pd-DMS	iPrOAc	Cs2CO3	826	UPLC	Method2	46	51
IDD-Pd-DMS	iPrOAc	Cs2CO3	826	UPLC	Method2	19	22
SIDD-Pd-DMS	iPrOAc	Cs2CO3	826	UPLC	Method2	56	66
IPr*-Pd-DMS	iPrOAc	Cs2CO3	826	UPLC	Method2	63	72
IPr*OMe-Pd-DMS	iPrOAc	Cs2CO3	826	UPLC	Method2	47	55
IPr-Pd-DMS	iPrOAc	K3PO4	826	UPLC	Method2	88	100
SIPr-Pd-DMS	iPrOAc	K3PO4	826	UPLC	Method2	66	78
IMes-Pd-DMS	iPrOAc	K3PO4	826	UPLC	Method2	56	65
SIMes-Pd-DMS	iPrOAc	K3PO4	826	UPLC	Method2	43	47
IDD-Pd-DMS	iPrOAc	K3PO4	826	UPLC	Method2	7	10
SIDD-Pd-DMS	iPrOAc	K3PO4	826	UPLC	Method2	25	27
IPr*-Pd-DMS	iPrOAc	K3PO4	826	UPLC	Method2	89	100
IPr*OMe-Pd-DMS	iPrOAc	K3PO4	826	UPLC	Method2	85	100
IPr-Pd-DMS	Me-THF	K2CO3	826	UPLC	Method2	15	13
SIPr-Pd-DMS	Me-THF	K2CO3	826	UPLC	Method2	8	7
IMes-Pd-DMS	Me-THF	K2CO3	826	UPLC	Method2	10	13
SIMes-Pd-DMS	Me-THF	K2CO3	826	UPLC	Method2	5	5
IDD-Pd-DMS	Me-THF	K2CO3	826	UPLC	Method2	4	2
SIDD-Pd-DMS	Me-THF	K2CO3	826	UPLC	Method2	9	7
IPr*-Pd-DMS	Me-THF	K2CO3	826	UPLC	Method2	17	15
IPr*OMe-Pd-DMS	Me-THF	K2CO3	826	UPLC	Method2	12	17
IPr-Pd-DMS	Me-THF	Cs2CO3	826	UPLC	Method2	89	100
SIPr-Pd-DMS	Me-THF	Cs2CO3	826	UPLC	Method2	79	88
IMes-Pd-DMS	Me-THF	Cs2CO3	826	UPLC	Method2	66	71
SIMes-Pd-DMS	Me-THF	Cs2CO3	826	UPLC	Method2	36	36
IDD-Pd-DMS	Me-THF	Cs2CO3	826	UPLC	Method2	19	21
SIDD-Pd-DMS	Me-THF	Cs2CO3	826	UPLC	Method2	45	52
IPr*-Pd-DMS	Me-THF	Cs2CO3	826	UPLC	Method2	26	24
IPr*OMe-Pd-DMS	Me-THF	Cs2CO3	826	UPLC	Method2	30	36
IPr-Pd-DMS	Me-THF	K3PO4	826	UPLC	Method2	89	100
SIPr-Pd-DMS	Me-THF	K3PO4	826	UPLC	Method2	32	33
IMes-Pd-DMS	Me-THF	K3PO4	826	UPLC	Method2	40	43
SIMes-Pd-DMS	Me-THF	K3PO4	826	UPLC	Method2	27	27
IDD-Pd-DMS	Me-THF	K3PO4	826	UPLC	Method2	5	1
SIDD-Pd-DMS	Me-THF	K3PO4	826	UPLC	Method2	16	16
IPr*-Pd-DMS	Me-THF	K3PO4	826	UPLC	Method2	56	62
IPr*OMe-Pd-DMS	Me-THF	K3PO4	826	UPLC	Method2	40	50
IPr-Pd-DMS	Toluene	K2CO3	826	UPLC	Method2	7
SIPr-Pd-DMS	Toluene	K2CO3	826	UPLC	Method2	3
IMes-Pd-DMS	Toluene	K2CO3	826	UPLC	Method2	3
SIMes-Pd-DMS	Toluene	K2CO3	826	UPLC	Method2	3
IDD-Pd-DMS	Toluene	K2CO3	826	UPLC	Method2	3
SIDD-Pd-DMS	Toluene	K2CO3	826	UPLC	Method2	3
IPr*-Pd-DMS	Toluene	K2CO3	826	UPLC	Method2	15
IPr*OMe-Pd-DMS	Toluene	K2CO3	826	UPLC	Method2	14
IPr-Pd-DMS	Toluene	Cs2CO3	826	UPLC	Method2	79
SIPr-Pd-DMS	Toluene	Cs2CO3	826	UPLC	Method2	62
IMes-Pd-DMS	Toluene	Cs2CO3	826	UPLC	Method2	20
SIMes-Pd-DMS	Toluene	Cs2CO3	826	UPLC	Method2	15
IDD-Pd-DMS	Toluene	Cs2CO3	826	UPLC	Method2	3
SIDD-Pd-DMS	Toluene	Cs2CO3	826	UPLC	Method2	6
IPr*-Pd-DMS	Toluene	Cs2CO3	826	UPLC	Method2	97
IPr*OMe-Pd-DMS	Toluene	Cs2CO3	826	UPLC	Method2	78
IPr-Pd-DMS	Toluene	K3PO4	826	UPLC	Method2	20
SIPr-Pd-DMS	Toluene	K3PO4	826	UPLC	Method2	13
IMes-Pd-DMS	Toluene	K3PO4	826	UPLC	Method2	16
SIMes-Pd-DMS	Toluene	K3PO4	826	UPLC	Method2	7
IDD-Pd-DMS	Toluene	K3PO4	826	UPLC	Method2	3
SIDD-Pd-DMS	Toluene	K3PO4	826	UPLC	Method2	3
IPr*-Pd-DMS	Toluene	K3PO4	826	UPLC	Method2	35
IPr*OMe-Pd-DMS	Toluene	K3PO4	826	UPLC	Method2	41
IPr-Pd-DMS	EtOH	K2CO3	825	GC	Method2	62	60
SIPr-Pd-DMS	EtOH	K2CO3	825	GC	Method2	53	100
IMes-Pd-DMS	EtOH	K2CO3	825	GC	Method2	38	52
SIMes-Pd-DMS	EtOH	K2CO3	825	GC	Method2	31	47
IDD-Pd-DMS	EtOH	K2CO3	825	GC	Method2	7	21
SIDD-Pd-DMS	EtOH	K2CO3	825	GC	Method2	3	12
IPr*-Pd-DMS	EtOH	K2CO3	825	GC	Method2	66	100
IPr*OMe-Pd-DMS	EtOH	K2CO3	825	GC	Method2	70	100
IPr-Pd-DMS	EtOH	Cs2CO3	825	GC	Method2	71	94
SIPr-Pd-DMS	EtOH	Cs2CO3	825	GC	Method2	7	22
IMes-Pd-DMS	EtOH	Cs2CO3	825	GC	Method2	36	47
SIMes-Pd-DMS	EtOH	Cs2CO3	825	GC	Method2	9	20
IDD-Pd-DMS	EtOH	Cs2CO3	825	GC	Method2	10	41
SIDD-Pd-DMS	EtOH	Cs2CO3	825	GC	Method2	6	26
IPr*-Pd-DMS	EtOH	Cs2CO3	825	GC	Method2	5	37
IPr*OMe-Pd-DMS	EtOH	Cs2CO3	825	GC	Method2	4	32
IPr-Pd-DMS	EtOH	K3PO4	825	GC	Method2	93	100
SIPr-Pd-DMS	EtOH	K3PO4	825	GC	Method2	84	100
IMes-Pd-DMS	EtOH	K3PO4	825	GC	Method2	28	37
SIMes-Pd-DMS	EtOH	K3PO4	825	GC	Method2	32	47
IDD-Pd-DMS	EtOH	K3PO4	825	GC	Method2	9	22
SIDD-Pd-DMS	EtOH	K3PO4	825	GC	Method2	6	16
IPr*-Pd-DMS	EtOH	K3PO4	825	GC	Method2	45	100
IPr*OMe-Pd-DMS	EtOH	K3PO4	825	GC	Method2	50	100
IPr-Pd-DMS	iPrOAc	K2CO3	825	GC	Method2	11	16
SIPr-Pd-DMS	iPrOAc	K2CO3	825	GC	Method2	5	8
IMes-Pd-DMS	iPrOAc	K2CO3	825	GC	Method2	9	13
SIMes-Pd-DMS	iPrOAc	K2CO3	825	GC	Method2	4	20
IDD-Pd-DMS	iPrOAc	K2CO3	825	GC	Method2	2	9
SIDD-Pd-DMS	iPrOAc	K2CO3	825	GC	Method2	4	9
IPr*-Pd-DMS	iPrOAc	K2CO3	825	GC	Method2	3	13
IPr*OMe-Pd-DMS	iPrOAc	K2CO3	825	GC	Method2	3	7
IPr-Pd-DMS	iPrOAc	Cs2CO3	825	GC	Method2	90	100
SIPr-Pd-DMS	iPrOAc	Cs2CO3	825	GC	Method2	84	98
IMes-Pd-DMS	iPrOAc	Cs2CO3	825	GC	Method2	48	56
SIMes-Pd-DMS	iPrOAc	Cs2CO3	825	GC	Method2	36	43
IDD-Pd-DMS	iPrOAc	Cs2CO3	825	GC	Method2	18	28
SIDD-Pd-DMS	iPrOAc	Cs2CO3	825	GC	Method2	52	64
IPr*-Pd-DMS	iPrOAc	Cs2CO3	825	GC	Method2	22	31
IPr*OMe-Pd-DMS	iPrOAc	Cs2CO3	825	GC	Method2	16	26
IPr-Pd-DMS	iPrOAc	K3PO4	825	GC	Method2	61	72
SIPr-Pd-DMS	iPrOAc	K3PO4	825	GC	Method2	32	41
IMes-Pd-DMS	iPrOAc	K3PO4	825	GC	Method2	37	40
SIMes-Pd-DMS	iPrOAc	K3PO4	825	GC	Method2	26	32
IDD-Pd-DMS	iPrOAc	K3PO4	825	GC	Method2	8	11
SIDD-Pd-DMS	iPrOAc	K3PO4	825	GC	Method2	25	33
IPr*-Pd-DMS	iPrOAc	K3PO4	825	GC	Method2	20	26
IPr*OMe-Pd-DMS	iPrOAc	K3PO4	825	GC	Method2	11	13
IPr-Pd-DMS	Me-THF	K2CO3	825	GC	Method2	4	3
SIPr-Pd-DMS	Me-THF	K2CO3	825	GC	Method2	2	2
IMes-Pd-DMS	Me-THF	K2CO3	825	GC	Method2	2	1
SIMes-Pd-DMS	Me-THF	K2CO3	825	GC	Method2	1	1
IDD-Pd-DMS	Me-THF	K2CO3	825	GC	Method2	1	1
SIDD-Pd-DMS	Me-THF	K2CO3	825	GC	Method2	2	5
IPr*-Pd-DMS	Me-THF	K2CO3	825	GC	Method2	3	7
IPr*OMe-Pd-DMS	Me-THF	K2CO3	825	GC	Method2	2	8
IPr-Pd-DMS	Me-THF	Cs2CO3	825	GC	Method2	93	100
SIPr-Pd-DMS	Me-THF	Cs2CO3	825	GC	Method2	65	73
IMes-Pd-DMS	Me-THF	Cs2CO3	825	GC	Method2	39	45
SIMes-Pd-DMS	Me-THF	Cs2CO3	825	GC	Method2	23	26
IDD-Pd-DMS	Me-THF	Cs2CO3	825	GC	Method2	10	16
SIDD-Pd-DMS	Me-THF	Cs2CO3	825	GC	Method2	34	43
IPr*-Pd-DMS	Me-THF	Cs2CO3	825	GC	Method2	8	14
IPr*OMe-Pd-DMS	Me-THF	Cs2CO3	825	GC	Method2	14	20
IPr-Pd-DMS	Me-THF	K3PO4	825	GC	Method2	34	41
SIPr-Pd-DMS	Me-THF	K3PO4	825	GC	Method2	23	23
IMes-Pd-DMS	Me-THF	K3PO4	825	GC	Method2	21	24
SIMes-Pd-DMS	Me-THF	K3PO4	825	GC	Method2	14	16
IDD-Pd-DMS	Me-THF	K3PO4	825	GC	Method2	3	4
SIDD-Pd-DMS	Me-THF	K3PO4	825	GC	Method2	12	17
IPr*-Pd-DMS	Me-THF	K3PO4	825	GC	Method2	19	21
IPr*OMe-Pd-DMS	Me-THF	K3PO4	825	GC	Method2	12	16
IPr-Pd-DMS	Toluene	K2CO3	825	GC	Method2	1	0
SIPr-Pd-DMS	Toluene	K2CO3	825	GC	Method2	1	0
IMes-Pd-DMS	Toluene	K2CO3	825	GC	Method2	1	0
SIMes-Pd-DMS	Toluene	K2CO3	825	GC	Method2	1	0
IDD-Pd-DMS	Toluene	K2CO3	825	GC	Method2	1	0
SIDD-Pd-DMS	Toluene	K2CO3	825	GC	Method2	1	0
IPr*-Pd-DMS	Toluene	K2CO3	825	GC	Method2	1	0
IPr*OMe-Pd-DMS	Toluene	K2CO3	825	GC	Method2	1	0
IPr-Pd-DMS	Toluene	Cs2CO3	825	GC	Method2	47	52
SIPr-Pd-DMS	Toluene	Cs2CO3	825	GC	Method2	26	27
IMes-Pd-DMS	Toluene	Cs2CO3	825	GC	Method2	19	22
SIMes-Pd-DMS	Toluene	Cs2CO3	825	GC	Method2	15	6
IDD-Pd-DMS	Toluene	Cs2CO3	825	GC	Method2	2	0
SIDD-Pd-DMS	Toluene	Cs2CO3	825	GC	Method2	7	7
IPr*-Pd-DMS	Toluene	Cs2CO3	825	GC	Method2	13	14
IPr*OMe-Pd-DMS	Toluene	Cs2CO3	825	GC	Method2	15	14
IPr-Pd-DMS	Toluene	K3PO4	825	GC	Method2	9	10
SIPr-Pd-DMS	Toluene	K3PO4	825	GC	Method2	7	4
IMes-Pd-DMS	Toluene	K3PO4	825	GC	Method2	8	8
SIMes-Pd-DMS	Toluene	K3PO4	825	GC	Method2	3	0
IDD-Pd-DMS	Toluene	K3PO4	825	GC	Method2	1	0
SIDD-Pd-DMS	Toluene	K3PO4	825	GC	Method2	1	0
IPr*-Pd-DMS	Toluene	K3PO4	825	GC	Method2
IPr*OMe-Pd-DMS	Toluene	K3PO4	825	GC	Method2	6	9
IPr-Pd-DMS	EtOH	K2CO3	826	GC	Method2	91	100
SIPr-Pd-DMS	EtOH	K2CO3	826	GC	Method2	89	100
IMes-Pd-DMS	EtOH	K2CO3	826	GC	Method2	42	53
SIMes-Pd-DMS	EtOH	K2CO3	826	GC	Method2	38	49
IDD-Pd-DMS	EtOH	K2CO3	826	GC	Method2	6	21
SIDD-Pd-DMS	EtOH	K2CO3	826	GC	Method2	4	12
IPr*-Pd-DMS	EtOH	K2CO3	826	GC	Method2	72	100
IPr*OMe-Pd-DMS	EtOH	K2CO3	826	GC	Method2	69	100
IPr-Pd-DMS	EtOH	Cs2CO3	826	GC	Method2	83	100
SIPr-Pd-DMS	EtOH	Cs2CO3	826	GC	Method2	15	30
IMes-Pd-DMS	EtOH	Cs2CO3	826	GC	Method2	53	68
SIMes-Pd-DMS	EtOH	Cs2CO3	826	GC	Method2	17	34
IDD-Pd-DMS	EtOH	Cs2CO3	826	GC	Method2	13	44
SIDD-Pd-DMS	EtOH	Cs2CO3	826	GC	Method2	9	37
IPr*-Pd-DMS	EtOH	Cs2CO3	826	GC	Method2	10	49
IPr*OMe-Pd-DMS	EtOH	Cs2CO3	826	GC	Method2	8	41
IPr-Pd-DMS	EtOH	K3PO4	826	GC	Method2	1	2
SIPr-Pd-DMS	EtOH	K3PO4	826	GC	Method2	84	100
IMes-Pd-DMS	EtOH	K3PO4	826	GC	Method2	24	32
SIMes-Pd-DMS	EtOH	K3PO4	826	GC	Method2	29	43
IDD-Pd-DMS	EtOH	K3PO4	826	GC	Method2	7	21
SIDD-Pd-DMS	EtOH	K3PO4	826	GC	Method2	5	20
IPr*-Pd-DMS	EtOH	K3PO4	826	GC	Method2	48	100
IPr*OMe-Pd-DMS	EtOH	K3PO4	826	GC	Method2	48	100
IPr-Pd-DMS	iPrOAc	K2CO3	826	GC	Method2	24	36
SIPr-Pd-DMS	iPrOAc	K2CO3	826	GC	Method2	10	18
IMes-Pd-DMS	iPrOAc	K2CO3	826	GC	Method2	13	20
SIMes-Pd-DMS	iPrOAc	K2CO3	826	GC	Method2	6	13
IDD-Pd-DMS	iPrOAc	K2CO3	826	GC	Method2	2	9
SIDD-Pd-DMS	iPrOAc	K2CO3	826	GC	Method2	8	16
IPr*-Pd-DMS	iPrOAc	K2CO3	826	GC	Method2	18	25
IPr*OMe-Pd-DMS	iPrOAc	K2CO3	826	GC	Method2	15	22
IPr-Pd-DMS	iPrOAc	Cs2CO3	826	GC	Method2	88	100
SIPr-Pd-DMS	iPrOAc	Cs2CO3	826	GC	Method2	87	100
IMes-Pd-DMS	iPrOAc	Cs2CO3	826	GC	Method2	68	79
SIMes-Pd-DMS	iPrOAc	Cs2CO3	826	GC	Method2	45	55
IDD-Pd-DMS	iPrOAc	Cs2CO3	826	GC	Method2	16	27
SIDD-Pd-DMS	iPrOAc	Cs2CO3	826	GC	Method2	55	70
IPr*-Pd-DMS	iPrOAc	Cs2CO3	826	GC	Method2	62	76
IPr*OMe-Pd-DMS	iPrOAc	Cs2CO3	826	GC	Method2	47	59
IPr-Pd-DMS	iPrOAc	K3PO4	826	GC	Method2	90	100
SIPr-Pd-DMS	iPrOAc	K3PO4	826	GC	Method2	66	81
IMes-Pd-DMS	iPrOAc	K3PO4	826	GC	Method2	56	67
SIMes-Pd-DMS	iPrOAc	K3PO4	826	GC	Method2	41	51
IDD-Pd-DMS	iPrOAc	K3PO4	826	GC	Method2	5	15
SIDD-Pd-DMS	iPrOAc	K3PO4	826	GC	Method2	23	33
IPr*-Pd-DMS	iPrOAc	K3PO4	826	GC	Method2	88	100
IPr*OMe-Pd-DMS	iPrOAc	K3PO4	826	GC	Method2	89	100
IPr-Pd-DMS	Me-THF	K2CO3	826	GC	Method2	12	15
SIPr-Pd-DMS	Me-THF	K2CO3	826	GC	Method2	5	10
IMes-Pd-DMS	Me-THF	K2CO3	826	GC	Method2	7	11
SIMes-Pd-DMS	Me-THF	K2CO3	826	GC	Method2	3	7
IDD-Pd-DMS	Me-THF	K2CO3	826	GC	Method2	2	7
SIDD-Pd-DMS	Me-THF	K2CO3	826	GC	Method2	6	13
IPr*-Pd-DMS	Me-THF	K2CO3	826	GC	Method2	14	19
IPr*OMe-Pd-DMS	Me-THF	K2CO3	826	GC	Method2	11	24
IPr-Pd-DMS	Me-THF	Cs2CO3	826	GC	Method2	91	100
SIPr-Pd-DMS	Me-THF	Cs2CO3	826	GC	Method2	80	92
IMes-Pd-DMS	Me-THF	Cs2CO3	826	GC	Method2	65	74
SIMes-Pd-DMS	Me-THF	Cs2CO3	826	GC	Method2	34	41
IDD-Pd-DMS	Me-THF	Cs2CO3	826	GC	Method2	16	25
SIDD-Pd-DMS	Me-THF	Cs2CO3	826	GC	Method2	44	57
IPr*-Pd-DMS	Me-THF	Cs2CO3	826	GC	Method2	23	31
IPr*OMe-Pd-DMS	Me-THF	Cs2CO3	826	GC	Method2	30	39
IPr-Pd-DMS	Me-THF	K3PO4	826	GC	Method2	91	100
SIPr-Pd-DMS	Me-THF	K3PO4	826	GC	Method2	30	38
IMes-Pd-DMS	Me-THF	K3PO4	826	GC	Method2	39	45
SIMes-Pd-DMS	Me-THF	K3PO4	826	GC	Method2	24	30
IDD-Pd-DMS	Me-THF	K3PO4	826	GC	Method2	3	7
SIDD-Pd-DMS	Me-THF	K3PO4	826	GC	Method2	14	21
IPr*-Pd-DMS	Me-THF	K3PO4	826	GC	Method2	54	67
IPr*OMe-Pd-DMS	Me-THF	K3PO4	826	GC	Method2	41	52
IPr-Pd-DMS	Toluene	K2CO3	826	GC	Method2	5	10
SIPr-Pd-DMS	Toluene	K2CO3	826	GC	Method2	2	2
IMes-Pd-DMS	Toluene	K2CO3	826	GC	Method2	1	0
SIMes-Pd-DMS	Toluene	K2CO3	826	GC	Method2	1	0
IDD-Pd-DMS	Toluene	K2CO3	826	GC	Method2	1	0
SIDD-Pd-DMS	Toluene	K2CO3	826	GC	Method2	1	4
IPr*-Pd-DMS	Toluene	K2CO3	826	GC	Method2	11	9
IPr*OMe-Pd-DMS	Toluene	K2CO3	826	GC	Method2	11	16
IPr-Pd-DMS	Toluene	Cs2CO3	826	GC	Method2	79	85
SIPr-Pd-DMS	Toluene	Cs2CO3	826	GC	Method2	61	74
IMes-Pd-DMS	Toluene	Cs2CO3	826	GC	Method2	17	14
SIMes-Pd-DMS	Toluene	Cs2CO3	826	GC	Method2	12	9
IDD-Pd-DMS	Toluene	Cs2CO3	826	GC	Method2	1	0
SIDD-Pd-DMS	Toluene	Cs2CO3	826	GC	Method2	4	16
IPr*-Pd-DMS	Toluene	Cs2CO3	826	GC	Method2	96	100
IPr*OMe-Pd-DMS	Toluene	Cs2CO3	826	GC	Method2	83	97
IPr-Pd-DMS	Toluene	K3PO4	826	GC	Method2	18	16
SIPr-Pd-DMS	Toluene	K3PO4	826	GC	Method2	10	13
IMes-Pd-DMS	Toluene	K3PO4	826	GC	Method2	13	12
SIMes-Pd-DMS	Toluene	K3PO4	826	GC	Method2	4	5
IDD-Pd-DMS	Toluene	K3PO4	826	GC	Method2	1	5
SIDD-Pd-DMS	Toluene	K3PO4	826	GC	Method2	2	4
IPr*-Pd-DMS	Toluene	K3PO4	826	GC	Method2	32	41
IPr*OMe-Pd-DMS	Toluene	K3PO4	826	GC	Method2	40	46
IPr#-Pd-DMS	EtOH	K2CO3	784	UPLC	Method1	72	100
BIAN-IMes-Pd-DMS	EtOH	K2CO3	784	UPLC	Method1	18	8
BIAN-IPr-Pd-DMS	EtOH	K2CO3	784	UPLC	Method1	89	100
BIAN-IPr#-Pd-DMS	EtOH	K2CO3	784	UPLC	Method1	21	42
IPrCl-Pd-DMS	EtOH	K2CO3	784	UPLC	Method1	83	100
IPentCl-Pd-DMS	EtOH	K2CO3	784	UPLC	Method1	75	100
INonCl-Pd-DMS	EtOH	K2CO3	784	UPLC	Method1	74	100
IPriPr-Pd-DMS	EtOH	K2CO3	784	UPLC	Method1	73	100
IPr#-Pd-DMS	EtOH	Cs2CO3	784	UPLC	Method1	16	50
BIAN-IMes-Pd-DMS	EtOH	Cs2CO3	784	UPLC	Method1	23	16
BIAN-IPr-Pd-DMS	EtOH	Cs2CO3	784	UPLC	Method1	19	24
BIAN-IPr#-Pd-DMS	EtOH	Cs2CO3	784	UPLC	Method1	6	12
IPrCl-Pd-DMS	EtOH	Cs2CO3	784	UPLC	Method1	23	41
IPentCl-Pd-DMS	EtOH	Cs2CO3	784	UPLC	Method1	31	100
INonCl-Pd-DMS	EtOH	Cs2CO3	784	UPLC	Method1	28	100
IPriPr-Pd-DMS	EtOH	Cs2CO3	784	UPLC	Method1	71	100
IPr#-Pd-DMS	EtOH	K3PO4	784	UPLC	Method1	24	100
BIAN-IMes-Pd-DMS	EtOH	K3PO4	784	UPLC	Method1	16	8
BIAN-IPr-Pd-DMS	EtOH	K3PO4	784	UPLC	Method1	92	100
BIAN-IPr#-Pd-DMS	EtOH	K3PO4	784	UPLC	Method1	24	100
IPrCl-Pd-DMS	EtOH	K3PO4	784	UPLC	Method1	89	100
IPentCl-Pd-DMS	EtOH	K3PO4	784	UPLC	Method1	65	100
INonCl-Pd-DMS	EtOH	K3PO4	784	UPLC	Method1	49	100
IPriPr-Pd-DMS	EtOH	K3PO4	784	UPLC	Method1	74	100
IPr#-Pd-DMS	iPrOAc	K2CO3	784	UPLC	Method1	14	28
BIAN-IMes-Pd-DMS	iPrOAc	K2CO3	784	UPLC	Method1	7	11
BIAN-IPr-Pd-DMS	iPrOAc	K2CO3	784	UPLC	Method1	11	19
BIAN-IPr#-Pd-DMS	iPrOAc	K2CO3	784	UPLC	Method1	5	17
IPrCl-Pd-DMS	iPrOAc	K2CO3	784	UPLC	Method1	31	42
IPentCl-Pd-DMS	iPrOAc	K2CO3	784	UPLC	Method1	55	71
INonCl-Pd-DMS	iPrOAc	K2CO3	784	UPLC	Method1	36	47
IPriPr-Pd-DMS	iPrOAc	K2CO3	784	UPLC	Method1	19	30
IPr#-Pd-DMS	iPrOAc	Cs2CO3	784	UPLC	Method1	83	100
BIAN-IMes-Pd-DMS	iPrOAc	Cs2CO3	784	UPLC	Method1	18	23
BIAN-IPr-Pd-DMS	iPrOAc	Cs2CO3	784	UPLC	Method1	69	82
BIAN-IPr#-Pd-DMS	iPrOAc	Cs2CO3	784	UPLC	Method1	13	24
IPrCl-Pd-DMS	iPrOAc	Cs2CO3	784	UPLC	Method1	84	100
IPentCl-Pd-DMS	iPrOAc	Cs2CO3	784	UPLC	Method1	81	100
INonCl-Pd-DMS	iPrOAc	Cs2CO3	784	UPLC	Method1	79	100
IPriPr-Pd-DMS	iPrOAc	Cs2CO3	784	UPLC	Method1	82	100
IPr#-Pd-DMS	iPrOAc	K3PO4	784	UPLC	Method1	28	37
BIAN-IMes-Pd-DMS	iPrOAc	K3PO4	784	UPLC	Method1	24	30
BIAN-IPr-Pd-DMS	iPrOAc	K3PO4	784	UPLC	Method1	21	25
BIAN-IPr#-Pd-DMS	iPrOAc	K3PO4	784	UPLC	Method1	10	24
IPrCl-Pd-DMS	iPrOAc	K3PO4	784	UPLC	Method1	44	58
IPentCl-Pd-DMS	iPrOAc	K3PO4	784	UPLC	Method1	65	87
INonCl-Pd-DMS	iPrOAc	K3PO4	784	UPLC	Method1	30	43
IPriPr-Pd-DMS	iPrOAc	K3PO4	784	UPLC	Method1	26	40
IPr#-Pd-DMS	Me-THF	K2CO3	784	UPLC	Method1	14	15
BIAN-IMes-Pd-DMS	Me-THF	K2CO3	784	UPLC	Method1	5	5
BIAN-IPr-Pd-DMS	Me-THF	K2CO3	784	UPLC	Method1	7	7
BIAN-IPr#-Pd-DMS	Me-THF	K2CO3	784	UPLC	Method1	3	12
IPrCl-Pd-DMS	Me-THF	K2CO3	784	UPLC	Method1	25	31
IPentCl-Pd-DMS	Me-THF	K2CO3	784	UPLC	Method1	46	55
INonCl-Pd-DMS	Me-THF	K2CO3	784	UPLC	Method1	29	34
IPriPr-Pd-DMS	Me-THF	K2CO3	784	UPLC	Method1	19	26
IPr#-Pd-DMS	Me-THF	Cs2CO3	784	UPLC	Method1	85	100
BIAN-IMes-Pd-DMS	Me-THF	Cs2CO3	784	UPLC	Method1	27	31
BIAN-IPr-Pd-DMS	Me-THF	Cs2CO3	784	UPLC	Method1	52	59
BIAN-IPr#-Pd-DMS	Me-THF	Cs2CO3	784	UPLC	Method1	8	17
IPrCl-Pd-DMS	Me-THF	Cs2CO3	784	UPLC	Method1	87	97
IPentCl-Pd-DMS	Me-THF	Cs2CO3	784	UPLC	Method1	88	100
INonCl-Pd-DMS	Me-THF	Cs2CO3	784	UPLC	Method1	57	65
IPriPr-Pd-DMS	Me-THF	Cs2CO3	784	UPLC	Method1	85	100
IPr#-Pd-DMS	Me-THF	K3PO4	784	UPLC	Method1	41	46
BIAN-IMes-Pd-DMS	Me-THF	K3PO4	784	UPLC	Method1	15	16
BIAN-IPr-Pd-DMS	Me-THF	K3PO4	784	UPLC	Method1	18	18
BIAN-IPr#-Pd-DMS	Me-THF	K3PO4	784	UPLC	Method1	6	10
IPrCl-Pd-DMS	Me-THF	K3PO4	784	UPLC	Method1	36	41
IPentCl-Pd-DMS	Me-THF	K3PO4	784	UPLC	Method1	72	87
INonCl-Pd-DMS	Me-THF	K3PO4	784	UPLC	Method1	24	28
IPriPr-Pd-DMS	Me-THF	K3PO4	784	UPLC	Method1	20	28
IPr#-Pd-DMS	Toluene	K2CO3	784	UPLC	Method1	48
BIAN-IMes-Pd-DMS	Toluene	K2CO3	784	UPLC	Method1	3
BIAN-IPr-Pd-DMS	Toluene	K2CO3	784	UPLC	Method1	5
BIAN-IPr#-Pd-DMS	Toluene	K2CO3	784	UPLC	Method1	3
IPrCl-Pd-DMS	Toluene	K2CO3	784	UPLC	Method1	32
IPentCl-Pd-DMS	Toluene	K2CO3	784	UPLC	Method1	45
INonCl-Pd-DMS	Toluene	K2CO3	784	UPLC	Method1	67
IPriPr-Pd-DMS	Toluene	K2CO3	784	UPLC	Method1	3
IPr#-Pd-DMS	Toluene	Cs2CO3	784	UPLC	Method1	81
BIAN-IMes-Pd-DMS	Toluene	Cs2CO3	784	UPLC	Method1	8
BIAN-IPr-Pd-DMS	Toluene	Cs2CO3	784	UPLC	Method1	26
BIAN-IPr#-Pd-DMS	Toluene	Cs2CO3	784	UPLC	Method1	3
IPrCl-Pd-DMS	Toluene	Cs2CO3	784	UPLC	Method1	55
IPentCl-Pd-DMS	Toluene	Cs2CO3	784	UPLC	Method1	85
INonCl-Pd-DMS	Toluene	Cs2CO3	784	UPLC	Method1	82
IPriPr-Pd-DMS	Toluene	Cs2CO3	784	UPLC	Method1	81
IPr#-Pd-DMS	Toluene	K3PO4	784	UPLC	Method1	28
BIAN-IMes-Pd-DMS	Toluene	K3PO4	784	UPLC	Method1	6
BIAN-IPr-Pd-DMS	Toluene	K3PO4	784	UPLC	Method1	12
BIAN-IPr#-Pd-DMS	Toluene	K3PO4	784	UPLC	Method1	3
IPrCl-Pd-DMS	Toluene	K3PO4	784	UPLC	Method1	27
IPentCl-Pd-DMS	Toluene	K3PO4	784	UPLC	Method1	44
INonCl-Pd-DMS	Toluene	K3PO4	784	UPLC	Method1	38
IPriPr-Pd-DMS	Toluene	K3PO4	784	UPLC	Method1	9
IPr#-Pd-DMS	EtOH	K2CO3	784bis	UPLC	Method1	64	100
BIAN-IMes-Pd-DMS	EtOH	K2CO3	784bis	UPLC	Method1	24	25
BIAN-IPr-Pd-DMS	EtOH	K2CO3	784bis	UPLC	Method1	84	100
BIAN-IPr#-Pd-DMS	EtOH	K2CO3	784bis	UPLC	Method1	18	44
IPrCl-Pd-DMS	EtOH	K2CO3	784bis	UPLC	Method1	84	100
IPentCl-Pd-DMS	EtOH	K2CO3	784bis	UPLC	Method1	78	100
INonCl-Pd-DMS	EtOH	K2CO3	784bis	UPLC	Method1	79	100
IPriPr-Pd-DMS	EtOH	K2CO3	784bis	UPLC	Method1	80	100
IPr#-Pd-DMS	EtOH	Cs2CO3	784bis	UPLC	Method1	14	53
BIAN-IMes-Pd-DMS	EtOH	Cs2CO3	784bis	UPLC	Method1	19	20
BIAN-IPr-Pd-DMS	EtOH	Cs2CO3	784bis	UPLC	Method1	14	20
BIAN-IPr#-Pd-DMS	EtOH	Cs2CO3	784bis	UPLC	Method1	6	20
IPrCl-Pd-DMS	EtOH	Cs2CO3	784bis	UPLC	Method1	20	41
IPentCl-Pd-DMS	EtOH	Cs2CO3	784bis	UPLC	Method1	29	100
INonCl-Pd-DMS	EtOH	Cs2CO3	784bis	UPLC	Method1	71	100
IPriPr-Pd-DMS	EtOH	Cs2CO3	784bis	UPLC	Method1	79	100
IPr#-Pd-DMS	EtOH	K3PO4	784bis	UPLC	Method1	24	100
BIAN-IMes-Pd-DMS	EtOH	K3PO4	784bis	UPLC	Method1	12	10
BIAN-IPr-Pd-DMS	EtOH	K3PO4	784bis	UPLC	Method1	84	100
BIAN-IPr#-Pd-DMS	EtOH	K3PO4	784bis	UPLC	Method1	21	100
IPrCl-Pd-DMS	EtOH	K3PO4	784bis	UPLC	Method1	83	100
IPentCl-Pd-DMS	EtOH	K3PO4	784bis	UPLC	Method1	68	100
INonCl-Pd-DMS	EtOH	K3PO4	784bis	UPLC	Method1	63	100
IPriPr-Pd-DMS	EtOH	K3PO4	784bis	UPLC	Method1	87	100
IPr#-Pd-DMS	iPrOAc	K2CO3	784bis	UPLC	Method1	10	19
BIAN-IMes-Pd-DMS	iPrOAc	K2CO3	784bis	UPLC	Method1	8	7
BIAN-IPr-Pd-DMS	iPrOAc	K2CO3	784bis	UPLC	Method1	13	16
BIAN-IPr#-Pd-DMS	iPrOAc	K2CO3	784bis	UPLC	Method1	5	9
IPrCl-Pd-DMS	iPrOAc	K2CO3	784bis	UPLC	Method1	28	35
IPentCl-Pd-DMS	iPrOAc	K2CO3	784bis	UPLC	Method1	38	48
INonCl-Pd-DMS	iPrOAc	K2CO3	784bis	UPLC	Method1	30	35
IPriPr-Pd-DMS	iPrOAc	K2CO3	784bis	UPLC	Method1	19	24
IPr#-Pd-DMS	iPrOAc	Cs2CO3	784bis	UPLC	Method1	87	100
BIAN-IMes-Pd-DMS	iPrOAc	Cs2CO3	784bis	UPLC	Method1	29	30
BIAN-IPr-Pd-DMS	iPrOAc	Cs2CO3	784bis	UPLC	Method1	60	65
BIAN-IPr#-Pd-DMS	iPrOAc	Cs2CO3	784bis	UPLC	Method1	9	16
IPrCl-Pd-DMS	iPrOAc	Cs2CO3	784bis	UPLC	Method1	87	100
IPentCl-Pd-DMS	iPrOAc	Cs2CO3	784bis	UPLC	Method1	86	100
INonCl-Pd-DMS	iPrOAc	Cs2CO3	784bis	UPLC	Method1	86	100
IPriPr-Pd-DMS	iPrOAc	Cs2CO3	784bis	UPLC	Method1	85	100
IPr#-Pd-DMS	iPrOAc	K3PO4	784bis	UPLC	Method1	25	26
BIAN-IMes-Pd-DMS	iPrOAc	K3PO4	784bis	UPLC	Method1	23	24
BIAN-IPr-Pd-DMS	iPrOAc	K3PO4	784bis	UPLC	Method1	23	29
BIAN-IPr#-Pd-DMS	iPrOAc	K3PO4	784bis	UPLC	Method1	12	15
IPrCl-Pd-DMS	iPrOAc	K3PO4	784bis	UPLC	Method1	47	54
IPentCl-Pd-DMS	iPrOAc	K3PO4	784bis	UPLC	Method1	72	86
INonCl-Pd-DMS	iPrOAc	K3PO4	784bis	UPLC	Method1	32	39
IPriPr-Pd-DMS	iPrOAc	K3PO4	784bis	UPLC	Method1	34	40
IPr#-Pd-DMS	Me-THF	K2CO3	784bis	UPLC	Method1	13	10
BIAN-IMes-Pd-DMS	Me-THF	K2CO3	784bis	UPLC	Method1	5	2
BIAN-IPr-Pd-DMS	Me-THF	K2CO3	784bis	UPLC	Method1	7	5
BIAN-IPr#-Pd-DMS	Me-THF	K2CO3	784bis	UPLC	Method1	3	6
IPrCl-Pd-DMS	Me-THF	K2CO3	784bis	UPLC	Method1	21	22
IPentCl-Pd-DMS	Me-THF	K2CO3	784bis	UPLC	Method1	35	38
INonCl-Pd-DMS	Me-THF	K2CO3	784bis	UPLC	Method1	24	26
IPriPr-Pd-DMS	Me-THF	K2CO3	784bis	UPLC	Method1	17	19
IPr#-Pd-DMS	Me-THF	Cs2CO3	784bis	UPLC	Method1	54	60
BIAN-IMes-Pd-DMS	Me-THF	Cs2CO3	784bis	UPLC	Method1	21	20
BIAN-IPr-Pd-DMS	Me-THF	Cs2CO3	784bis	UPLC	Method1	26	24
BIAN-IPr#-Pd-DMS	Me-THF	Cs2CO3	784bis	UPLC	Method1	7	9
IPrCl-Pd-DMS	Me-THF	Cs2CO3	784bis	UPLC	Method1	69	77
IPentCl-Pd-DMS	Me-THF	Cs2CO3	784bis	UPLC	Method1	87	100
INonCl-Pd-DMS	Me-THF	Cs2CO3	784bis	UPLC	Method1	37	39
IPriPr-Pd-DMS	Me-THF	Cs2CO3	784bis	UPLC	Method1	87	100
IPr#-Pd-DMS	Me-THF	K3PO4	784bis	UPLC	Method1	32	34
BIAN-IMes-Pd-DMS	Me-THF	K3PO4	784bis	UPLC	Method1	14	13
BIAN-IPr-Pd-DMS	Me-THF	K3PO4	784bis	UPLC	Method1	17	16
BIAN-IPr#-Pd-DMS	Me-THF	K3PO4	784bis	UPLC	Method1	5	6
IPrCl-Pd-DMS	Me-THF	K3PO4	784bis	UPLC	Method1	35	37
IPentCl-Pd-DMS	Me-THF	K3PO4	784bis	UPLC	Method1	69	79
INonCl-Pd-DMS	Me-THF	K3PO4	784bis	UPLC	Method1	27	30
IPriPr-Pd-DMS	Me-THF	K3PO4	784bis	UPLC	Method1	23	27
IPr#-Pd-DMS	Toluene	K2CO3	784bis	UPLC	Method1	14
BIAN-IMes-Pd-DMS	Toluene	K2CO3	784bis	UPLC	Method1	3
BIAN-IPr-Pd-DMS	Toluene	K2CO3	784bis	UPLC	Method1	3
BIAN-IPr#-Pd-DMS	Toluene	K2CO3	784bis	UPLC	Method1	3
IPrCl-Pd-DMS	Toluene	K2CO3	784bis	UPLC	Method1	27
IPentCl-Pd-DMS	Toluene	K2CO3	784bis	UPLC	Method1	41
INonCl-Pd-DMS	Toluene	K2CO3	784bis	UPLC	Method1	51
IPriPr-Pd-DMS	Toluene	K2CO3	784bis	UPLC	Method1	3
IPr#-Pd-DMS	Toluene	Cs2CO3	784bis	UPLC	Method1	83
BIAN-IMes-Pd-DMS	Toluene	Cs2CO3	784bis	UPLC	Method1	8
BIAN-IPr-Pd-DMS	Toluene	Cs2CO3	784bis	UPLC	Method1	25
BIAN-IPr#-Pd-DMS	Toluene	Cs2CO3	784bis	UPLC	Method1	3
IPrCl-Pd-DMS	Toluene	Cs2CO3	784bis	UPLC	Method1	76
IPentCl-Pd-DMS	Toluene	Cs2CO3	784bis	UPLC	Method1	87
INonCl-Pd-DMS	Toluene	Cs2CO3	784bis	UPLC	Method1	86
IPriPr-Pd-DMS	Toluene	Cs2CO3	784bis	UPLC	Method1	87
IPr#-Pd-DMS	Toluene	K3PO4	784bis	UPLC	Method1	26
BIAN-IMes-Pd-DMS	Toluene	K3PO4	784bis	UPLC	Method1	6
BIAN-IPr-Pd-DMS	Toluene	K3PO4	784bis	UPLC	Method1	11
BIAN-IPr#-Pd-DMS	Toluene	K3PO4	784bis	UPLC	Method1	3
IPrCl-Pd-DMS	Toluene	K3PO4	784bis	UPLC	Method1	25
IPentCl-Pd-DMS	Toluene	K3PO4	784bis	UPLC	Method1	41
INonCl-Pd-DMS	Toluene	K3PO4	784bis	UPLC	Method1	39
IPriPr-Pd-DMS	Toluene	K3PO4	784bis	UPLC	Method1	12
IPr#-Pd-DMS	EtOH	K2CO3	827	UPLC	Method2	71	100
BIAN-IMes-Pd-DMS	EtOH	K2CO3	827	UPLC	Method2	19	14
BIAN-IPr-Pd-DMS	EtOH	K2CO3	827	UPLC	Method2	90	100
BIAN-IPr#-Pd-DMS	EtOH	K2CO3	827	UPLC	Method2	10	23
IPrCl-Pd-DMS	EtOH	K2CO3	827	UPLC	Method2	91	100
IPentCl-Pd-DMS	EtOH	K2CO3	827	UPLC	Method2	88	100
INonCl-Pd-DMS	EtOH	K2CO3	827	UPLC	Method2	84	100
IPriPr-Pd-DMS	EtOH	K2CO3	827	UPLC	Method2	90	100
IPr#-Pd-DMS	EtOH	Cs2CO3	827	UPLC	Method2	17	70
BIAN-IMes-Pd-DMS	EtOH	Cs2CO3	827	UPLC	Method2	16	16
BIAN-IPr-Pd-DMS	EtOH	Cs2CO3	827	UPLC	Method2	17	23
BIAN-IPr#-Pd-DMS	EtOH	Cs2CO3	827	UPLC	Method2	6	17
IPrCl-Pd-DMS	EtOH	Cs2CO3	827	UPLC	Method2	27	41
IPentCl-Pd-DMS	EtOH	Cs2CO3	827	UPLC	Method2	32	100
INonCl-Pd-DMS	EtOH	Cs2CO3	827	UPLC	Method2	30	100
IPriPr-Pd-DMS	EtOH	Cs2CO3	827	UPLC	Method2	84	100
IPr#-Pd-DMS	EtOH	K3PO4	827	UPLC	Method2	35	100
BIAN-IMes-Pd-DMS	EtOH	K3PO4	827	UPLC	Method2	25	21
BIAN-IPr-Pd-DMS	EtOH	K3PO4	827	UPLC	Method2	87	100
BIAN-IPr#-Pd-DMS	EtOH	K3PO4	827	UPLC	Method2	22	73
IPrCl-Pd-DMS	EtOH	K3PO4	827	UPLC	Method2	87	100
IPentCl-Pd-DMS	EtOH	K3PO4	827	UPLC	Method2	70	100
INonCl-Pd-DMS	EtOH	K3PO4	827	UPLC	Method2	69	100
IPriPr-Pd-DMS	EtOH	K3PO4	827	UPLC	Method2	88	100
IPr#-Pd-DMS	iPrOAc	K2CO3	827	UPLC	Method2	5	0
BIAN-IMes-Pd-DMS	iPrOAc	K2CO3	827	UPLC	Method2	5	1
BIAN-IPr-Pd-DMS	iPrOAc	K2CO3	827	UPLC	Method2	5	9
BIAN-IPr#-Pd-DMS	iPrOAc	K2CO3	827	UPLC	Method2	3	7
IPrCl-Pd-DMS	iPrOAc	K2CO3	827	UPLC	Method2	14	10
IPentCl-Pd-DMS	iPrOAc	K2CO3	827	UPLC	Method2	22	23
INonCl-Pd-DMS	iPrOAc	K2CO3	827	UPLC	Method2	14	17
IPriPr-Pd-DMS	iPrOAc	K2CO3	827	UPLC	Method2	10	12
IPr#-Pd-DMS	iPrOAc	Cs2CO3	827	UPLC	Method2	58	62
BIAN-IMes-Pd-DMS	iPrOAc	Cs2CO3	827	UPLC	Method2	14	10
BIAN-IPr-Pd-DMS	iPrOAc	Cs2CO3	827	UPLC	Method2	69	76
BIAN-IPr#-Pd-DMS	iPrOAc	Cs2CO3	827	UPLC	Method2	8	9
IPrCl-Pd-DMS	iPrOAc	Cs2CO3	827	UPLC	Method2	90	100
IPentCl-Pd-DMS	iPrOAc	Cs2CO3	827	UPLC	Method2	90	100
INonCl-Pd-DMS	iPrOAc	Cs2CO3	827	UPLC	Method2	90	100
IPriPr-Pd-DMS	iPrOAc	Cs2CO3	827	UPLC	Method2	90	100
IPr#-Pd-DMS	iPrOAc	K3PO4	827	UPLC	Method2	59	63
BIAN-IMes-Pd-DMS	iPrOAc	K3PO4	827	UPLC	Method2	29	27
BIAN-IPr-Pd-DMS	iPrOAc	K3PO4	827	UPLC	Method2	35	36
BIAN-IPr#-Pd-DMS	iPrOAc	K3PO4	827	UPLC	Method2	11	11
IPrCl-Pd-DMS	iPrOAc	K3PO4	827	UPLC	Method2	70	76
IPentCl-Pd-DMS	iPrOAc	K3PO4	827	UPLC	Method2	86	100
INonCl-Pd-DMS	iPrOAc	K3PO4	827	UPLC	Method2	48	53
IPriPr-Pd-DMS	iPrOAc	K3PO4	827	UPLC	Method2	58	71
IPr#-Pd-DMS	Me-THF	K2CO3	827	UPLC	Method2	3	0
BIAN-IMes-Pd-DMS	Me-THF	K2CO3	827	UPLC	Method2	3	0
BIAN-IPr-Pd-DMS	Me-THF	K2CO3	827	UPLC	Method2	3	0
BIAN-IPr#-Pd-DMS	Me-THF	K2CO3	827	UPLC	Method2	3	3
IPrCl-Pd-DMS	Me-THF	K2CO3	827	UPLC	Method2	10	0
IPentCl-Pd-DMS	Me-THF	K2CO3	827	UPLC	Method2	13	10
INonCl-Pd-DMS	Me-THF	K2CO3	827	UPLC	Method2	9	5
IPriPr-Pd-DMS	Me-THF	K2CO3	827	UPLC	Method2	4	0
IPr#-Pd-DMS	Me-THF	Cs2CO3	827	UPLC	Method2	53	55
BIAN-IMes-Pd-DMS	Me-THF	Cs2CO3	827	UPLC	Method2	15	8
BIAN-IPr-Pd-DMS	Me-THF	Cs2CO3	827	UPLC	Method2	27	25
BIAN-IPr#-Pd-DMS	Me-THF	Cs2CO3	827	UPLC	Method2	6	5
IPrCl-Pd-DMS	Me-THF	Cs2CO3	827	UPLC	Method2	87	95
IPentCl-Pd-DMS	Me-THF	Cs2CO3	827	UPLC	Method2	90	100
INonCl-Pd-DMS	Me-THF	Cs2CO3	827	UPLC	Method2	76	90
IPriPr-Pd-DMS	Me-THF	Cs2CO3	827	UPLC	Method2	89	100
IPr#-Pd-DMS	Me-THF	K3PO4	827	UPLC	Method2	59	65
BIAN-IMes-Pd-DMS	Me-THF	K3PO4	827	UPLC	Method2	27	24
BIAN-IPr-Pd-DMS	Me-THF	K3PO4	827	UPLC	Method2	31	29
BIAN-IPr#-Pd-DMS	Me-THF	K3PO4	827	UPLC	Method2	7	6
IPrCl-Pd-DMS	Me-THF	K3PO4	827	UPLC	Method2	57	57
IPentCl-Pd-DMS	Me-THF	K3PO4	827	UPLC	Method2	86	99
INonCl-Pd-DMS	Me-THF	K3PO4	827	UPLC	Method2	67	74
IPriPr-Pd-DMS	Me-THF	K3PO4	827	UPLC	Method2	66	76
IPr#-Pd-DMS	Toluene	K2CO3	827	UPLC	Method2	3
BIAN-IMes-Pd-DMS	Toluene	K2CO3	827	UPLC	Method2	3
BIAN-IPr-Pd-DMS	Toluene	K2CO3	827	UPLC	Method2	14
BIAN-IPr#-Pd-DMS	Toluene	K2CO3	827	UPLC	Method2	3
IPrCl-Pd-DMS	Toluene	K2CO3	827	UPLC	Method2	11
IPentCl-Pd-DMS	Toluene	K2CO3	827	UPLC	Method2	11
INonCl-Pd-DMS	Toluene	K2CO3	827	UPLC	Method2	15
IPriPr-Pd-DMS	Toluene	K2CO3	827	UPLC	Method2	3
IPr#-Pd-DMS	Toluene	Cs2CO3	827	UPLC	Method2	85
BIAN-IMes-Pd-DMS	Toluene	Cs2CO3	827	UPLC	Method2	15
BIAN-IPr-Pd-DMS	Toluene	Cs2CO3	827	UPLC	Method2	26
BIAN-IPr#-Pd-DMS	Toluene	Cs2CO3	827	UPLC	Method2	3
IPrCl-Pd-DMS	Toluene	Cs2CO3	827	UPLC	Method2	66
IPentCl-Pd-DMS	Toluene	Cs2CO3	827	UPLC	Method2	88
INonCl-Pd-DMS	Toluene	Cs2CO3	827	UPLC	Method2	97
IPriPr-Pd-DMS	Toluene	Cs2CO3	827	UPLC	Method2	96
IPr#-Pd-DMS	Toluene	K3PO4	827	UPLC	Method2	30
BIAN-IMes-Pd-DMS	Toluene	K3PO4	827	UPLC	Method2	6
BIAN-IPr-Pd-DMS	Toluene	K3PO4	827	UPLC	Method2	9
BIAN-IPr#-Pd-DMS	Toluene	K3PO4	827	UPLC	Method2	3
IPrCl-Pd-DMS	Toluene	K3PO4	827	UPLC	Method2	40
IPentCl-Pd-DMS	Toluene	K3PO4	827	UPLC	Method2	63
INonCl-Pd-DMS	Toluene	K3PO4	827	UPLC	Method2	69
IPriPr-Pd-DMS	Toluene	K3PO4	827	UPLC	Method2	17
IPr#-Pd-DMS	EtOH	K2CO3	828	UPLC	Method2	69.6109	97
BIAN-IMes-Pd-DMS	EtOH	K2CO3	828	UPLC	Method2	17.8416	11
BIAN-IPr-Pd-DMS	EtOH	K2CO3	828	UPLC	Method2	86.9304	96
BIAN-IPr#-Pd-DMS	EtOH	K2CO3	828	UPLC	Method2	10.6581	22
IPrCl-Pd-DMS	EtOH	K2CO3	828	UPLC	Method2	88.6453	97
IPentCl-Pd-DMS	EtOH	K2CO3	828	UPLC	Method2	85.5727	96
INonCl-Pd-DMS	EtOH	K2CO3	828	UPLC	Method2	73.4664	96
IPriPr-Pd-DMS	EtOH	K2CO3	828	UPLC	Method2	88.622	96
IPr#-Pd-DMS	EtOH	Cs2CO3	828	UPLC	Method2	15.9898	59
BIAN-IMes-Pd-DMS	EtOH	Cs2CO3	828	UPLC	Method2	16.2629	14
BIAN-IPr-Pd-DMS	EtOH	Cs2CO3	828	UPLC	Method2	18.2139	20
BIAN-IPr#-Pd-DMS	EtOH	Cs2CO3	828	UPLC	Method2	6.0908	12
IPrCl-Pd-DMS	EtOH	Cs2CO3	828	UPLC	Method2	29.9286	38
IPentCl-Pd-DMS	EtOH	Cs2CO3	828	UPLC	Method2	36.0599	96
INonCl-Pd-DMS	EtOH	Cs2CO3	828	UPLC	Method2	34.7509	97
IPriPr-Pd-DMS	EtOH	Cs2CO3	828	UPLC	Method2	84.4845	96
IPr#-Pd-DMS	EtOH	K3PO4	828	UPLC	Method2	37.8878	97
BIAN-IMes-Pd-DMS	EtOH	K3PO4	828	UPLC	Method2	23.9702	15
BIAN-IPr-Pd-DMS	EtOH	K3PO4	828	UPLC	Method2	87.7073	97
BIAN-IPr#-Pd-DMS	EtOH	K3PO4	828	UPLC	Method2	23.2724	81
IPrCl-Pd-DMS	EtOH	K3PO4	828	UPLC	Method2	87.7904	97
IPentCl-Pd-DMS	EtOH	K3PO4	828	UPLC	Method2	72.8351	97
INonCl-Pd-DMS	EtOH	K3PO4	828	UPLC	Method2	70.8966	97
IPriPr-Pd-DMS	EtOH	K3PO4	828	UPLC	Method2	89.8199	97
IPr#-Pd-DMS	iPrOAc	K2CO3	828	UPLC	Method2	4.74851	0
BIAN-IMes-Pd-DMS	iPrOAc	K2CO3	828	UPLC	Method2	5.1218	0
BIAN-IPr-Pd-DMS	iPrOAc	K2CO3	828	UPLC	Method2	5.71989	0
BIAN-IPr#-Pd-DMS	iPrOAc	K2CO3	828	UPLC	Method2	3.44249	9
IPrCl-Pd-DMS	iPrOAc	K2CO3	828	UPLC	Method2	14.2295	5
IPentCl-Pd-DMS	iPrOAc	K2CO3	828	UPLC	Method2	21.2517	18
INonCl-Pd-DMS	iPrOAc	K2CO3	828	UPLC	Method2	13.0304	9
IPriPr-Pd-DMS	iPrOAc	K2CO3	828	UPLC	Method2	9.91553	7
IPr#-Pd-DMS	iPrOAc	Cs2CO3	828	UPLC	Method2	87.89	97
BIAN-IMes-Pd-DMS	iPrOAc	Cs2CO3	828	UPLC	Method2	13.318	5
BIAN-IPr-Pd-DMS	iPrOAc	Cs2CO3	828	UPLC	Method2	72.4865	77
BIAN-IPr#-Pd-DMS	iPrOAc	Cs2CO3	828	UPLC	Method2	8.03983	4
IPrCl-Pd-DMS	iPrOAc	Cs2CO3	828	UPLC	Method2	91.1783	94
IPentCl-Pd-DMS	iPrOAc	Cs2CO3	828	UPLC	Method2	92.0097	96
INonCl-Pd-DMS	iPrOAc	Cs2CO3	828	UPLC	Method2	89.2433	97
IPriPr-Pd-DMS	iPrOAc	Cs2CO3	828	UPLC	Method2	89.7626	97
IPr#-Pd-DMS	iPrOAc	K3PO4	828	UPLC	Method2	48.327	46
BIAN-IMes-Pd-DMS	iPrOAc	K3PO4	828	UPLC	Method2	28.5958	24
BIAN-IPr-Pd-DMS	iPrOAc	K3PO4	828	UPLC	Method2	34.5077	32
BIAN-IPr#-Pd-DMS	iPrOAc	K3PO4	828	UPLC	Method2	10.5767	6
IPrCl-Pd-DMS	iPrOAc	K3PO4	828	UPLC	Method2	64.9159	66
IPentCl-Pd-DMS	iPrOAc	K3PO4	828	UPLC	Method2	87.6343	92
INonCl-Pd-DMS	iPrOAc	K3PO4	828	UPLC	Method2	48.9698	52
IPriPr-Pd-DMS	iPrOAc	K3PO4	828	UPLC	Method2	81.4508	92
IPr#-Pd-DMS	Me-THF	K2CO3	828	UPLC	Method2	3.44249	0
BIAN-IMes-Pd-DMS	Me-THF	K2CO3	828	UPLC	Method2	3.44249	0
BIAN-IPr-Pd-DMS	Me-THF	K2CO3	828	UPLC	Method2	3.44249	0
BIAN-IPr#-Pd-DMS	Me-THF	K2CO3	828	UPLC	Method2	3.44249	0
IPrCl-Pd-DMS	Me-THF	K2CO3	828	UPLC	Method2	4.53697	0
IPentCl-Pd-DMS	Me-THF	K2CO3	828	UPLC	Method2	12.0256	3
INonCl-Pd-DMS	Me-THF	K2CO3	828	UPLC	Method2	7.65703	0
IPriPr-Pd-DMS	Me-THF	K2CO3	828	UPLC	Method2	4.41639	0
IPr#-Pd-DMS	Me-THF	Cs2CO3	828	UPLC	Method2	21.9778	19
BIAN-IMes-Pd-DMS	Me-THF	Cs2CO3	828	UPLC	Method2	14.6641	7
BIAN-IPr-Pd-DMS	Me-THF	Cs2CO3	828	UPLC	Method2	28.4566	25
BIAN-IPr#-Pd-DMS	Me-THF	Cs2CO3	828	UPLC	Method2	6.31948	0
IPrCl-Pd-DMS	Me-THF	Cs2CO3	828	UPLC	Method2	88.7564	93
IPentCl-Pd-DMS	Me-THF	Cs2CO3	828	UPLC	Method2	89.8351	96
INonCl-Pd-DMS	Me-THF	Cs2CO3	828	UPLC	Method2	88.8904	96
IPriPr-Pd-DMS	Me-THF	Cs2CO3	828	UPLC	Method2	88.7944	97
IPr#-Pd-DMS	Me-THF	K3PO4	828	UPLC	Method2	61.1118	62
BIAN-IMes-Pd-DMS	Me-THF	K3PO4	828	UPLC	Method2	24.3334	18
BIAN-IPr-Pd-DMS	Me-THF	K3PO4	828	UPLC	Method2	19.0456	13
BIAN-IPr#-Pd-DMS	Me-THF	K3PO4	828	UPLC	Method2	7.03533	4
IPrCl-Pd-DMS	Me-THF	K3PO4	828	UPLC	Method2	58.839	57
IPentCl-Pd-DMS	Me-THF	K3PO4	828	UPLC	Method2	88.0424	96
INonCl-Pd-DMS	Me-THF	K3PO4	828	UPLC	Method2	49.3041	50
IPriPr-Pd-DMS	Me-THF	K3PO4	828	UPLC	Method2	66.3956	73
IPr#-Pd-DMS	Toluene	K2CO3	828	UPLC	Method2	3.44249
BIAN-IMes-Pd-DMS	Toluene	K2CO3	828	UPLC	Method2	3.44249
BIAN-IPr-Pd-DMS	Toluene	K2CO3	828	UPLC	Method2	3.44249
BIAN-IPr#-Pd-DMS	Toluene	K2CO3	828	UPLC	Method2	3.44249
IPrCl-Pd-DMS	Toluene	K2CO3	828	UPLC	Method2	5.83935
IPentCl-Pd-DMS	Toluene	K2CO3	828	UPLC	Method2	9.78334
INonCl-Pd-DMS	Toluene	K2CO3	828	UPLC	Method2	9.54164
IPriPr-Pd-DMS	Toluene	K2CO3	828	UPLC	Method2	3.44249
IPr#-Pd-DMS	Toluene	Cs2CO3	828	UPLC	Method2	70.8102
BIAN-IMes-Pd-DMS	Toluene	Cs2CO3	828	UPLC	Method2	13.2488
BIAN-IPr-Pd-DMS	Toluene	Cs2CO3	828	UPLC	Method2	22.4923
BIAN-IPr#-Pd-DMS	Toluene	Cs2CO3	828	UPLC	Method2	3.44249
IPrCl-Pd-DMS	Toluene	Cs2CO3	828	UPLC	Method2	66.9531
IPentCl-Pd-DMS	Toluene	Cs2CO3	828	UPLC	Method2	76.9627
INonCl-Pd-DMS	Toluene	Cs2CO3	828	UPLC	Method2
IPriPr-Pd-DMS	Toluene	Cs2CO3	828	UPLC	Method2	70.5398
IPr#-Pd-DMS	Toluene	K3PO4	828	UPLC	Method2	40.1735
BIAN-IMes-Pd-DMS	Toluene	K3PO4	828	UPLC	Method2	6.21705
BIAN-IPr-Pd-DMS	Toluene	K3PO4	828	UPLC	Method2	9.5569
BIAN-IPr#-Pd-DMS	Toluene	K3PO4	828	UPLC	Method2	3.44249
IPrCl-Pd-DMS	Toluene	K3PO4	828	UPLC	Method2	39.6447
IPentCl-Pd-DMS	Toluene	K3PO4	828	UPLC	Method2	38.7071
INonCl-Pd-DMS	Toluene	K3PO4	828	UPLC	Method2	45.1083
IPriPr-Pd-DMS	Toluene	K3PO4	828	UPLC	Method2	16.9716
IPr#-Pd-DMS	EtOH	K2CO3	827	GC	Method2	71	100
BIAN-IMes-Pd-DMS	EtOH	K2CO3	827	GC	Method2	15	22
BIAN-IPr-Pd-DMS	EtOH	K2CO3	827	GC	Method2	91	100
BIAN-IPr#-Pd-DMS	EtOH	K2CO3	827	GC	Method2	8	25
IPrCl-Pd-DMS	EtOH	K2CO3	827	GC	Method2	92	100
IPentCl-Pd-DMS	EtOH	K2CO3	827	GC	Method2	88	100
INonCl-Pd-DMS	EtOH	K2CO3	827	GC	Method2	84	100
IPriPr-Pd-DMS	EtOH	K2CO3	827	GC	Method2	92	100
IPr#-Pd-DMS	EtOH	Cs2CO3	827	GC	Method2	15	74
BIAN-IMes-Pd-DMS	EtOH	Cs2CO3	827	GC	Method2	13	23
BIAN-IPr-Pd-DMS	EtOH	Cs2CO3	827	GC	Method2	14	27
BIAN-IPr#-Pd-DMS	EtOH	Cs2CO3	827	GC	Method2	4	19
IPrCl-Pd-DMS	EtOH	Cs2CO3	827	GC	Method2	22	46
IPentCl-Pd-DMS	EtOH	Cs2CO3	827	GC	Method2	30	100
INonCl-Pd-DMS	EtOH	Cs2CO3	827	GC	Method2	27	100
IPriPr-Pd-DMS	EtOH	Cs2CO3	827	GC	Method2	83	100
IPr#-Pd-DMS	EtOH	K3PO4	827	GC	Method2	33	100
BIAN-IMes-Pd-DMS	EtOH	K3PO4	827	GC	Method2	20	29
BIAN-IPr-Pd-DMS	EtOH	K3PO4	827	GC	Method2	87	100
BIAN-IPr#-Pd-DMS	EtOH	K3PO4	827	GC	Method2	21	76
IPrCl-Pd-DMS	EtOH	K3PO4	827	GC	Method2	88	100
IPentCl-Pd-DMS	EtOH	K3PO4	827	GC	Method2	69	100
INonCl-Pd-DMS	EtOH	K3PO4	827	GC	Method2	67	100
IPriPr-Pd-DMS	EtOH	K3PO4	827	GC	Method2	89	100
IPr#-Pd-DMS	iPrOAc	K2CO3	827	GC	Method2	2	3
BIAN-IMes-Pd-DMS	iPrOAc	K2CO3	827	GC	Method2	3	6
BIAN-IPr-Pd-DMS	iPrOAc	K2CO3	827	GC	Method2	3	14
BIAN-IPr#-Pd-DMS	iPrOAc	K2CO3	827	GC	Method2	1	8
IPrCl-Pd-DMS	iPrOAc	K2CO3	827	GC	Method2	9	16
IPentCl-Pd-DMS	iPrOAc	K2CO3	827	GC	Method2	20	28
INonCl-Pd-DMS	iPrOAc	K2CO3	827	GC	Method2	11	23
IPriPr-Pd-DMS	iPrOAc	K2CO3	827	GC	Method2	8	20
IPr#-Pd-DMS	iPrOAc	Cs2CO3	827	GC	Method2	57	66
BIAN-IMes-Pd-DMS	iPrOAc	Cs2CO3	827	GC	Method2	11	14
BIAN-IPr-Pd-DMS	iPrOAc	Cs2CO3	827	GC	Method2	69	80
BIAN-IPr#-Pd-DMS	iPrOAc	Cs2CO3	827	GC	Method2	6	13
IPrCl-Pd-DMS	iPrOAc	Cs2CO3	827	GC	Method2	91	100
IPentCl-Pd-DMS	iPrOAc	Cs2CO3	827	GC	Method2	91	100
INonCl-Pd-DMS	iPrOAc	Cs2CO3	827	GC	Method2	90	100
IPriPr-Pd-DMS	iPrOAc	Cs2CO3	827	GC	Method2	91	100
IPr#-Pd-DMS	iPrOAc	K3PO4	827	GC	Method2	58	67
BIAN-IMes-Pd-DMS	iPrOAc	K3PO4	827	GC	Method2	27	32
BIAN-IPr-Pd-DMS	iPrOAc	K3PO4	827	GC	Method2	33	42
BIAN-IPr#-Pd-DMS	iPrOAc	K3PO4	827	GC	Method2	8	15
IPrCl-Pd-DMS	iPrOAc	K3PO4	827	GC	Method2	68	80
IPentCl-Pd-DMS	iPrOAc	K3PO4	827	GC	Method2	87	100
INonCl-Pd-DMS	iPrOAc	K3PO4	827	GC	Method2	46	58
IPriPr-Pd-DMS	iPrOAc	K3PO4	827	GC	Method2	56	76
IPr#-Pd-DMS	Me-THF	K2CO3	827	GC	Method2	1	1
BIAN-IMes-Pd-DMS	Me-THF	K2CO3	827	GC	Method2	1	4
BIAN-IPr-Pd-DMS	Me-THF	K2CO3	827	GC	Method2	1	9
BIAN-IPr#-Pd-DMS	Me-THF	K2CO3	827	GC	Method2	1	6
IPrCl-Pd-DMS	Me-THF	K2CO3	827	GC	Method2	3	0
IPentCl-Pd-DMS	Me-THF	K2CO3	827	GC	Method2	10	19
INonCl-Pd-DMS	Me-THF	K2CO3	827	GC	Method2	6	13
IPriPr-Pd-DMS	Me-THF	K2CO3	827	GC	Method2	2	8
IPr#-Pd-DMS	Me-THF	Cs2CO3	827	GC	Method2	52	61
BIAN-IMes-Pd-DMS	Me-THF	Cs2CO3	827	GC	Method2	12	15
BIAN-IPr-Pd-DMS	Me-THF	Cs2CO3	827	GC	Method2	25	31
BIAN-IPr#-Pd-DMS	Me-THF	Cs2CO3	827	GC	Method2	4	11
IPrCl-Pd-DMS	Me-THF	Cs2CO3	827	GC	Method2	87	98
IPentCl-Pd-DMS	Me-THF	Cs2CO3	827	GC	Method2	92	100
INonCl-Pd-DMS	Me-THF	Cs2CO3	827	GC	Method2	75	94
IPriPr-Pd-DMS	Me-THF	Cs2CO3	827	GC	Method2	89	100
IPr#-Pd-DMS	Me-THF	K3PO4	827	GC	Method2	59	69
BIAN-IMes-Pd-DMS	Me-THF	K3PO4	827	GC	Method2	25	31
BIAN-IPr-Pd-DMS	Me-THF	K3PO4	827	GC	Method2	29	36
BIAN-IPr#-Pd-DMS	Me-THF	K3PO4	827	GC	Method2	5	11
IPrCl-Pd-DMS	Me-THF	K3PO4	827	GC	Method2	54	63
IPentCl-Pd-DMS	Me-THF	K3PO4	827	GC	Method2	88	100
INonCl-Pd-DMS	Me-THF	K3PO4	827	GC	Method2	66	80
IPriPr-Pd-DMS	Me-THF	K3PO4	827	GC	Method2	66	81
IPr#-Pd-DMS	Toluene	K2CO3	827	GC	Method2	2	5
BIAN-IMes-Pd-DMS	Toluene	K2CO3	827	GC	Method2	1	0
BIAN-IPr-Pd-DMS	Toluene	K2CO3	827	GC	Method2	1	1
BIAN-IPr#-Pd-DMS	Toluene	K2CO3	827	GC	Method2	1	0
IPrCl-Pd-DMS	Toluene	K2CO3	827	GC	Method2	4	5
IPentCl-Pd-DMS	Toluene	K2CO3	827	GC	Method2	9	6
INonCl-Pd-DMS	Toluene	K2CO3	827	GC	Method2	13	11
IPriPr-Pd-DMS	Toluene	K2CO3	827	GC	Method2	1	0
IPr#-Pd-DMS	Toluene	Cs2CO3	827	GC	Method2	86	92
BIAN-IMes-Pd-DMS	Toluene	Cs2CO3	827	GC	Method2	12	8
BIAN-IPr-Pd-DMS	Toluene	Cs2CO3	827	GC	Method2	24	25
BIAN-IPr#-Pd-DMS	Toluene	Cs2CO3	827	GC	Method2	2	1
IPrCl-Pd-DMS	Toluene	Cs2CO3	827	GC	Method2	62	68
IPentCl-Pd-DMS	Toluene	Cs2CO3	827	GC	Method2	89	92
INonCl-Pd-DMS	Toluene	Cs2CO3	827	GC	Method2	97	100
IPriPr-Pd-DMS	Toluene	Cs2CO3	827	GC	Method2	97	100
IPr#-Pd-DMS	Toluene	K3PO4	827	GC	Method2	28	29
BIAN-IMes-Pd-DMS	Toluene	K3PO4	827	GC	Method2	4	0
BIAN-IPr-Pd-DMS	Toluene	K3PO4	827	GC	Method2	6	3
BIAN-IPr#-Pd-DMS	Toluene	K3PO4	827	GC	Method2	1	2
IPrCl-Pd-DMS	Toluene	K3PO4	827	GC	Method2	35	31
IPentCl-Pd-DMS	Toluene	K3PO4	827	GC	Method2	62	63
INonCl-Pd-DMS	Toluene	K3PO4	827	GC	Method2	68	70
IPriPr-Pd-DMS	Toluene	K3PO4	827	GC	Method2	14	13
IPr#-Pd-DMS	EtOH	K2CO3	828	GC	Method2	69	100
BIAN-IMes-Pd-DMS	EtOH	K2CO3	828	GC	Method2	14	24
BIAN-IPr-Pd-DMS	EtOH	K2CO3	828	GC	Method2	87	100
BIAN-IPr#-Pd-DMS	EtOH	K2CO3	828	GC	Method2	8	30
IPrCl-Pd-DMS	EtOH	K2CO3	828	GC	Method2	89	100
IPentCl-Pd-DMS	EtOH	K2CO3	828	GC	Method2	85	100
INonCl-Pd-DMS	EtOH	K2CO3	828	GC	Method2	72	100
IPriPr-Pd-DMS	EtOH	K2CO3	828	GC	Method2	89	100
IPr#-Pd-DMS	EtOH	Cs2CO3	828	GC	Method2	13	67
BIAN-IMes-Pd-DMS	EtOH	Cs2CO3	828	GC	Method2	13	25
BIAN-IPr-Pd-DMS	EtOH	Cs2CO3	828	GC	Method2	16	31
BIAN-IPr#-Pd-DMS	EtOH	Cs2CO3	828	GC	Method2	4	22
IPrCl-Pd-DMS	EtOH	Cs2CO3	828	GC	Method2	25	47
IPentCl-Pd-DMS	EtOH	Cs2CO3	828	GC	Method2	34	100
INonCl-Pd-DMS	EtOH	Cs2CO3	828	GC	Method2	32	100
IPriPr-Pd-DMS	EtOH	Cs2CO3	828	GC	Method2	83	100
IPr#-Pd-DMS	EtOH	K3PO4	828	GC	Method2	35	100
BIAN-IMes-Pd-DMS	EtOH	K3PO4	828	GC	Method2	18	29
BIAN-IPr-Pd-DMS	EtOH	K3PO4	828	GC	Method2	87	100
BIAN-IPr#-Pd-DMS	EtOH	K3PO4	828	GC	Method2	22	86
IPrCl-Pd-DMS	EtOH	K3PO4	828	GC	Method2	87	100
IPentCl-Pd-DMS	EtOH	K3PO4	828	GC	Method2	71	100
INonCl-Pd-DMS	EtOH	K3PO4	828	GC	Method2	68	100
IPriPr-Pd-DMS	EtOH	K3PO4	828	GC	Method2	89	100
IPr#-Pd-DMS	iPrOAc	K2CO3	828	GC	Method2	2	7
BIAN-IMes-Pd-DMS	iPrOAc	K2CO3	828	GC	Method2	2	10
BIAN-IPr-Pd-DMS	iPrOAc	K2CO3	828	GC	Method2	3	11
BIAN-IPr#-Pd-DMS	iPrOAc	K2CO3	828	GC	Method2	1	16
IPrCl-Pd-DMS	iPrOAc	K2CO3	828	GC	Method2	9	15
IPentCl-Pd-DMS	iPrOAc	K2CO3	828	GC	Method2	19	27
INonCl-Pd-DMS	iPrOAc	K2CO3	828	GC	Method2	10	19
IPriPr-Pd-DMS	iPrOAc	K2CO3	828	GC	Method2	8	13
IPr#-Pd-DMS	iPrOAc	Cs2CO3	828	GC	Method2	88	100
BIAN-IMes-Pd-DMS	iPrOAc	Cs2CO3	828	GC	Method2	10	15
BIAN-IPr-Pd-DMS	iPrOAc	Cs2CO3	828	GC	Method2	72	84
BIAN-IPr#-Pd-DMS	iPrOAc	Cs2CO3	828	GC	Method2	6	12
IPrCl-Pd-DMS	iPrOAc	Cs2CO3	828	GC	Method2	90	100
IPentCl-Pd-DMS	iPrOAc	Cs2CO3	828	GC	Method2	92	100
INonCl-Pd-DMS	iPrOAc	Cs2CO3	828	GC	Method2	89	100
IPriPr-Pd-DMS	iPrOAc	Cs2CO3	828	GC	Method2	88	100
IPr#-Pd-DMS	iPrOAc	K3PO4	828	GC	Method2	45	55
BIAN-IMes-Pd-DMS	iPrOAc	K3PO4	828	GC	Method2	26	34
BIAN-IPr-Pd-DMS	iPrOAc	K3PO4	828	GC	Method2	32	43
BIAN-IPr#-Pd-DMS	iPrOAc	K3PO4	828	GC	Method2	8	17
IPrCl-Pd-DMS	iPrOAc	K3PO4	828	GC	Method2	63	76
IPentCl-Pd-DMS	iPrOAc	K3PO4	828	GC	Method2	88	100
INonCl-Pd-DMS	iPrOAc	K3PO4	828	GC	Method2	47	61
IPriPr-Pd-DMS	iPrOAc	K3PO4	828	GC	Method2	80	98
IPr#-Pd-DMS	Me-THF	K2CO3	828	GC	Method2	1	4
BIAN-IMes-Pd-DMS	Me-THF	K2CO3	828	GC	Method2	1	6
BIAN-IPr-Pd-DMS	Me-THF	K2CO3	828	GC	Method2	1	10
BIAN-IPr#-Pd-DMS	Me-THF	K2CO3	828	GC	Method2	1	8
IPrCl-Pd-DMS	Me-THF	K2CO3	828	GC	Method2	2	11
IPentCl-Pd-DMS	Me-THF	K2CO3	828	GC	Method2	10	19
INonCl-Pd-DMS	Me-THF	K2CO3	828	GC	Method2	5	12
IPriPr-Pd-DMS	Me-THF	K2CO3	828	GC	Method2	2	5
IPr#-Pd-DMS	Me-THF	Cs2CO3	828	GC	Method2	19	30
BIAN-IMes-Pd-DMS	Me-THF	Cs2CO3	828	GC	Method2	12	18
BIAN-IPr-Pd-DMS	Me-THF	Cs2CO3	828	GC	Method2	26	35
BIAN-IPr#-Pd-DMS	Me-THF	Cs2CO3	828	GC	Method2	4	13
IPrCl-Pd-DMS	Me-THF	Cs2CO3	828	GC	Method2	86	99
IPentCl-Pd-DMS	Me-THF	Cs2CO3	828	GC	Method2	90	100
INonCl-Pd-DMS	Me-THF	Cs2CO3	828	GC	Method2	88	100
IPriPr-Pd-DMS	Me-THF	Cs2CO3	828	GC	Method2	87	100
IPr#-Pd-DMS	Me-THF	K3PO4	828	GC	Method2	58	70
BIAN-IMes-Pd-DMS	Me-THF	K3PO4	828	GC	Method2	22	29
BIAN-IPr-Pd-DMS	Me-THF	K3PO4	828	GC	Method2	17	24
BIAN-IPr#-Pd-DMS	Me-THF	K3PO4	828	GC	Method2	5	10
IPrCl-Pd-DMS	Me-THF	K3PO4	828	GC	Method2	55	66
IPentCl-Pd-DMS	Me-THF	K3PO4	828	GC	Method2	89	100
INonCl-Pd-DMS	Me-THF	K3PO4	828	GC	Method2	47	59
IPriPr-Pd-DMS	Me-THF	K3PO4	828	GC	Method2	65	81
IPr#-Pd-DMS	Toluene	K2CO3	828	GC	Method2	1	0
BIAN-IMes-Pd-DMS	Toluene	K2CO3	828	GC	Method2	1	2
BIAN-IPr-Pd-DMS	Toluene	K2CO3	828	GC	Method2	1	0
BIAN-IPr#-Pd-DMS	Toluene	K2CO3	828	GC	Method2	1	3
IPrCl-Pd-DMS	Toluene	K2CO3	828	GC	Method2	4	7
IPentCl-Pd-DMS	Toluene	K2CO3	828	GC	Method2	7	7
INonCl-Pd-DMS	Toluene	K2CO3	828	GC	Method2	7	15
IPriPr-Pd-DMS	Toluene	K2CO3	828	GC	Method2	1	0
IPr#-Pd-DMS	Toluene	Cs2CO3	828	GC	Method2	69	79
BIAN-IMes-Pd-DMS	Toluene	Cs2CO3	828	GC	Method2	10	11
BIAN-IPr-Pd-DMS	Toluene	Cs2CO3	828	GC	Method2	20	22
BIAN-IPr#-Pd-DMS	Toluene	Cs2CO3	828	GC	Method2	2	3
IPrCl-Pd-DMS	Toluene	Cs2CO3	828	GC	Method2	62	70
IPentCl-Pd-DMS	Toluene	Cs2CO3	828	GC	Method2	76	87
INonCl-Pd-DMS	Toluene	Cs2CO3	828	GC	Method2	0	60
IPriPr-Pd-DMS	Toluene	Cs2CO3	828	GC	Method2	69	81
IPr#-Pd-DMS	Toluene	K3PO4	828	GC	Method2	37	40
BIAN-IMes-Pd-DMS	Toluene	K3PO4	828	GC	Method2	4	5
BIAN-IPr-Pd-DMS	Toluene	K3PO4	828	GC	Method2	6	9
BIAN-IPr#-Pd-DMS	Toluene	K3PO4	828	GC	Method2	1	6
IPrCl-Pd-DMS	Toluene	K3PO4	828	GC	Method2	34	39
IPentCl-Pd-DMS	Toluene	K3PO4	828	GC	Method2	37	42
INonCl-Pd-DMS	Toluene	K3PO4	828	GC	Method2	43	50
IPriPr-Pd-DMS	Toluene	K3PO4	828	GC	Method2	14	11
IPent-Pd-DMS	EtOH	K2CO3	883	UPLC	Method2	87	100
IHept-Pd-DMS	EtOH	K2CO3	883	UPLC	Method2	93	100
IPr*Tol-Pd-DMS	EtOH	K2CO3	883	UPLC	Method2	80	100
IHeptCl-Pd-DMS	EtOH	K2CO3	883	UPLC	Method2	80	100
IPaul-Pd-DMS	EtOH	K2CO3	883	UPLC	Method2	88	100
IPr-PEPPSI	EtOH	K2CO3	883	UPLC	Method2	92	99
IPr*-PEPPSI	EtOH	K2CO3	883	UPLC	Method2	79	100
INonCl-PEPPSI	EtOH	K2CO3	883	UPLC	Method2	79	100
IPent-Pd-DMS	EtOH	Cs2CO3	883	UPLC	Method2	76	100
IHept-Pd-DMS	EtOH	Cs2CO3	883	UPLC	Method2	72	100
IPr*Tol-Pd-DMS	EtOH	Cs2CO3	883	UPLC	Method2	24	45
IHeptCl-Pd-DMS	EtOH	Cs2CO3	883	UPLC	Method2	47	100
IPaul-Pd-DMS	EtOH	Cs2CO3	883	UPLC	Method2	71	83
IPr-PEPPSI	EtOH	Cs2CO3	883	UPLC	Method2	81	98
IPr*-PEPPSI	EtOH	Cs2CO3	883	UPLC	Method2	15	37
INonCl-PEPPSI	EtOH	Cs2CO3	883	UPLC	Method2	39	100
IPent-Pd-DMS	EtOH	K3PO4	883	UPLC	Method2	87	98
IHept-Pd-DMS	EtOH	K3PO4	883	UPLC	Method2	86	97
IPr*Tol-Pd-DMS	EtOH	K3PO4	883	UPLC	Method2	90	100
IHeptCl-Pd-DMS	EtOH	K3PO4	883	UPLC	Method2	89	100
IPaul-Pd-DMS	EtOH	K3PO4	883	UPLC	Method2	94	100
IPr-PEPPSI	EtOH	K3PO4	883	UPLC	Method2	89	97
IPr*-PEPPSI	EtOH	K3PO4	883	UPLC	Method2	66	100
INonCl-PEPPSI	EtOH	K3PO4	883	UPLC	Method2	82	100
IPent-Pd-DMS	iPrOAc	K2CO3	883	UPLC	Method2	85	100
IHept-Pd-DMS	iPrOAc	K2CO3	883	UPLC	Method2	71	84
IPr*Tol-Pd-DMS	iPrOAc	K2CO3	883	UPLC	Method2	36	42
IHeptCl-Pd-DMS	iPrOAc	K2CO3	883	UPLC	Method2	71	84
IPaul-Pd-DMS	iPrOAc	K2CO3	883	UPLC	Method2	66	75
IPr-PEPPSI	iPrOAc	K2CO3	883	UPLC	Method2	84	97
IPr*-PEPPSI	iPrOAc	K2CO3	883	UPLC	Method2	6	9
INonCl-PEPPSI	iPrOAc	K2CO3	883	UPLC	Method2	62	75
IPent-Pd-DMS	iPrOAc	Cs2CO3	883	UPLC	Method2	85	100
IHept-Pd-DMS	iPrOAc	Cs2CO3	883	UPLC	Method2	80	95
IPr*Tol-Pd-DMS	iPrOAc	Cs2CO3	883	UPLC	Method2	87	100
IHeptCl-Pd-DMS	iPrOAc	Cs2CO3	883	UPLC	Method2	60	74
IPaul-Pd-DMS	iPrOAc	Cs2CO3	883	UPLC	Method2		100
IPr-PEPPSI	iPrOAc	Cs2CO3	883	UPLC	Method2	84	97
IPr*-PEPPSI	iPrOAc	Cs2CO3	883	UPLC	Method2	59	71
INonCl-PEPPSI	iPrOAc	Cs2CO3	883	UPLC	Method2	85	100
IPent-Pd-DMS	iPrOAc	K3PO4	883	UPLC	Method2	84	100
IHept-Pd-DMS	iPrOAc	K3PO4	883	UPLC	Method2	40	48
IPr*Tol-Pd-DMS	iPrOAc	K3PO4	883	UPLC	Method2	40	45
IHeptCl-Pd-DMS	iPrOAc	K3PO4	883	UPLC	Method2	84	100
IPaul-Pd-DMS	iPrOAc	K3PO4	883	UPLC	Method2		100
IPr-PEPPSI	iPrOAc	K3PO4	883	UPLC	Method2	85	100
IPr*-PEPPSI	iPrOAc	K3PO4	883	UPLC	Method2	78	89
INonCl-PEPPSI	iPrOAc	K3PO4	883	UPLC	Method2	87	100
IPent-Pd-DMS	Me-THF	K2CO3	883	UPLC	Method2	56	64
IHept-Pd-DMS	Me-THF	K2CO3	883	UPLC	Method2	35	40
IPr*Tol-Pd-DMS	Me-THF	K2CO3	883	UPLC	Method2	28	30
IHeptCl-Pd-DMS	Me-THF	K2CO3	883	UPLC	Method2	49	58
IPaul-Pd-DMS	Me-THF	K2CO3	883	UPLC	Method2		48
IPr-PEPPSI	Me-THF	K2CO3	883	UPLC	Method2	21	24
IPr*-PEPPSI	Me-THF	K2CO3	883	UPLC	Method2	6	3
INonCl-PEPPSI	Me-THF	K2CO3	883	UPLC	Method2	34	37
IPent-Pd-DMS	Me-THF	Cs2CO3	883	UPLC	Method2	83	96
IHept-Pd-DMS	Me-THF	Cs2CO3	883	UPLC	Method2	80	93
IPr*Tol-Pd-DMS	Me-THF	Cs2CO3	883	UPLC	Method2	89	100
IHeptCl-Pd-DMS	Me-THF	Cs2CO3	883	UPLC	Method2	75	88
IPaul-Pd-DMS	Me-THF	Cs2CO3	883	UPLC	Method2		93
IPr-PEPPSI	Me-THF	Cs2CO3	883	UPLC	Method2	83	98
IPr*-PEPPSI	Me-THF	Cs2CO3	883	UPLC	Method2	31	37
INonCl-PEPPSI	Me-THF	Cs2CO3	883	UPLC	Method2	83	100
IPent-Pd-DMS	Me-THF	K3PO4	883	UPLC	Method2	56	63
IHept-Pd-DMS	Me-THF	K3PO4	883	UPLC	Method2	61	69
IPr*Tol-Pd-DMS	Me-THF	K3PO4	883	UPLC	Method2	90	99
IHeptCl-Pd-DMS	Me-THF	K3PO4	883	UPLC	Method2	85	97
IPaul-Pd-DMS	Me-THF	K3PO4	883	UPLC	Method2		100
IPr-PEPPSI	Me-THF	K3PO4	883	UPLC	Method2	86	98
IPr*-PEPPSI	Me-THF	K3PO4	883	UPLC	Method2	50	54
INonCl-PEPPSI	Me-THF	K3PO4	883	UPLC	Method2	86	100
IPent-Pd-DMS	Toluene	K2CO3	883	UPLC	Method2	68
IHept-Pd-DMS	Toluene	K2CO3	883	UPLC	Method2	56
IPr*Tol-Pd-DMS	Toluene	K2CO3	883	UPLC	Method2	38
IHeptCl-Pd-DMS	Toluene	K2CO3	883	UPLC	Method2	68
IPaul-Pd-DMS	Toluene	K2CO3	883	UPLC	Method2	17
IPr-PEPPSI	Toluene	K2CO3	883	UPLC	Method2	18
IPr*-PEPPSI	Toluene	K2CO3	883	UPLC	Method2	15
INonCl-PEPPSI	Toluene	K2CO3	883	UPLC	Method2	92
IPent-Pd-DMS	Toluene	Cs2CO3	883	UPLC	Method2	60
IHept-Pd-DMS	Toluene	Cs2CO3	883	UPLC	Method2	44
IPr*Tol-Pd-DMS	Toluene	Cs2CO3	883	UPLC	Method2	78
IHeptCl-Pd-DMS	Toluene	Cs2CO3	883	UPLC	Method2	71
IPaul-Pd-DMS	Toluene	Cs2CO3	883	UPLC	Method2	40
IPr-PEPPSI	Toluene	Cs2CO3	883	UPLC	Method2	78
IPr*-PEPPSI	Toluene	Cs2CO3	883	UPLC	Method2	66
INonCl-PEPPSI	Toluene	Cs2CO3	883	UPLC	Method2	89
IPent-Pd-DMS	Toluene	K3PO4	883	UPLC	Method2	22
IHept-Pd-DMS	Toluene	K3PO4	883	UPLC	Method2	15
IPr*Tol-Pd-DMS	Toluene	K3PO4	883	UPLC	Method2	35
IHeptCl-Pd-DMS	Toluene	K3PO4	883	UPLC	Method2	63
IPaul-Pd-DMS	Toluene	K3PO4	883	UPLC	Method2	30
IPr-PEPPSI	Toluene	K3PO4	883	UPLC	Method2	51
IPr*-PEPPSI	Toluene	K3PO4	883	UPLC	Method2	24
INonCl-PEPPSI	Toluene	K3PO4	883	UPLC	Method2	87
IPent-Pd-DMS	EtOH	K2CO3	884	UPLC	Method2	91	100
IHept-Pd-DMS	EtOH	K2CO3	884	UPLC	Method2	93	100
IPr*Tol-Pd-DMS	EtOH	K2CO3	884	UPLC	Method2	80	100
IHeptCl-Pd-DMS	EtOH	K2CO3	884	UPLC	Method2	81	100
IPaul-Pd-DMS	EtOH	K2CO3	884	UPLC	Method2	89	100
IPr-PEPPSI	EtOH	K2CO3	884	UPLC	Method2	100	99
IPr*-PEPPSI	EtOH	K2CO3	884	UPLC	Method2	81	100
INonCl-PEPPSI	EtOH	K2CO3	884	UPLC	Method2	83	100
IPent-Pd-DMS	EtOH	Cs2CO3	884	UPLC	Method2	74	100
IHept-Pd-DMS	EtOH	Cs2CO3	884	UPLC	Method2	72	100
IPr*Tol-Pd-DMS	EtOH	Cs2CO3	884	UPLC	Method2	25	49
IHeptCl-Pd-DMS	EtOH	Cs2CO3	884	UPLC	Method2	46	100
IPaul-Pd-DMS	EtOH	Cs2CO3	884	UPLC	Method2	83	93
IPr-PEPPSI	EtOH	Cs2CO3	884	UPLC	Method2	88	99
IPr*-PEPPSI	EtOH	Cs2CO3	884	UPLC	Method2	17	41
INonCl-PEPPSI	EtOH	Cs2CO3	884	UPLC	Method2	39	100
IPent-Pd-DMS	EtOH	K3PO4	884	UPLC	Method2	78	89
IHept-Pd-DMS	EtOH	K3PO4	884	UPLC	Method2	79	91
IPr*Tol-Pd-DMS	EtOH	K3PO4	884	UPLC	Method2	74	100
IHeptCl-Pd-DMS	EtOH	K3PO4	884	UPLC	Method2	85	100
IPaul-Pd-DMS	EtOH	K3PO4	884	UPLC	Method2		100
IPr-PEPPSI	EtOH	K3PO4	884	UPLC	Method2	94	99
IPr*-PEPPSI	EtOH	K3PO4	884	UPLC	Method2	74	100
INonCl-PEPPSI	EtOH	K3PO4	884	UPLC	Method2	83	100
IPent-Pd-DMS	iPrOAc	K2CO3	884	UPLC	Method2	86	100
IHept-Pd-DMS	iPrOAc	K2CO3	884	UPLC	Method2	60	70
IPr*Tol-Pd-DMS	iPrOAc	K2CO3	884	UPLC	Method2	70	82
IHeptCl-Pd-DMS	iPrOAc	K2CO3	884	UPLC	Method2	64	74
IPaul-Pd-DMS	iPrOAc	K2CO3	884	UPLC	Method2	37	43
IPr-PEPPSI	iPrOAc	K2CO3	884	UPLC	Method2	89	100
IPr*-PEPPSI	iPrOAc	K2CO3	884	UPLC	Method2	9	12
INonCl-PEPPSI	iPrOAc	K2CO3	884	UPLC	Method2	85	100
IPent-Pd-DMS	iPrOAc	Cs2CO3	884	UPLC	Method2	85	100
IHept-Pd-DMS	iPrOAc	Cs2CO3	884	UPLC	Method2	80	95
IPr*Tol-Pd-DMS	iPrOAc	Cs2CO3	884	UPLC	Method2	85	100
IHeptCl-Pd-DMS	iPrOAc	Cs2CO3	884	UPLC	Method2	83	100
IPaul-Pd-DMS	iPrOAc	Cs2CO3	884	UPLC	Method2		100
IPr-PEPPSI	iPrOAc	Cs2CO3	884	UPLC	Method2	89	99
IPr*-PEPPSI	iPrOAc	Cs2CO3	884	UPLC	Method2	64	73
INonCl-PEPPSI	iPrOAc	Cs2CO3	884	UPLC	Method2	84	100
IPent-Pd-DMS	iPrOAc	K3PO4	884	UPLC	Method2	86	97
IHept-Pd-DMS	iPrOAc	K3PO4	884	UPLC	Method2	43	51
IPr*Tol-Pd-DMS	iPrOAc	K3PO4	884	UPLC	Method2	89	100
IHeptCl-Pd-DMS	iPrOAc	K3PO4	884	UPLC	Method2	84	100
IPaul-Pd-DMS	iPrOAc	K3PO4	884	UPLC	Method2		100
IPr-PEPPSI	iPrOAc	K3PO4	884	UPLC	Method2	91	99
IPr*-PEPPSI	iPrOAc	K3PO4	884	UPLC	Method2	83	94
INonCl-PEPPSI	iPrOAc	K3PO4	884	UPLC	Method2	87	100
IPent-Pd-DMS	Me-THF	K2CO3	884	UPLC	Method2	30	33
IHept-Pd-DMS	Me-THF	K2CO3	884	UPLC	Method2	33	36
IPr*Tol-Pd-DMS	Me-THF	K2CO3	884	UPLC	Method2	28	26
IHeptCl-Pd-DMS	Me-THF	K2CO3	884	UPLC	Method2	26	31
IPaul-Pd-DMS	Me-THF	K2CO3	884	UPLC	Method2		34
IPr-PEPPSI	Me-THF	K2CO3	884	UPLC	Method2	27	62
IPr*-PEPPSI	Me-THF	K2CO3	884	UPLC	Method2	6	1
INonCl-PEPPSI	Me-THF	K2CO3	884	UPLC	Method2	31	31
IPent-Pd-DMS	Me-THF	Cs2CO3	884	UPLC	Method2	84	94
IHept-Pd-DMS	Me-THF	Cs2CO3	884	UPLC	Method2	77	90
IPr*Tol-Pd-DMS	Me-THF	Cs2CO3	884	UPLC	Method2	85	98
IHeptCl-Pd-DMS	Me-THF	Cs2CO3	884	UPLC	Method2	82	96
IPaul-Pd-DMS	Me-THF	Cs2CO3	884	UPLC	Method2		98
IPr-PEPPSI	Me-THF	Cs2CO3	884	UPLC	Method2	76	91
IPr*-PEPPSI	Me-THF	Cs2CO3	884	UPLC	Method2	28	36
INonCl-PEPPSI	Me-THF	Cs2CO3	884	UPLC	Method2	84	100
IPent-Pd-DMS	Me-THF	K3PO4	884	UPLC	Method2	20	18
IHept-Pd-DMS	Me-THF	K3PO4	884	UPLC	Method2	33	36
IPr*Tol-Pd-DMS	Me-THF	K3PO4	884	UPLC	Method2	88	100
IHeptCl-Pd-DMS	Me-THF	K3PO4	884	UPLC	Method2	84	100
IPaul-Pd-DMS	Me-THF	K3PO4	884	UPLC	Method2		100
IPr-PEPPSI	Me-THF	K3PO4	884	UPLC	Method2	93	99
IPr*-PEPPSI	Me-THF	K3PO4	884	UPLC	Method2	50	53
INonCl-PEPPSI	Me-THF	K3PO4	884	UPLC	Method2	82	93
IPent-Pd-DMS	Toluene	K2CO3	884	UPLC	Method2	43
IHept-Pd-DMS	Toluene	K2CO3	884	UPLC	Method2	47
IPr*Tol-Pd-DMS	Toluene	K2CO3	884	UPLC	Method2	37
IHeptCl-Pd-DMS	Toluene	K2CO3	884	UPLC	Method2	66
IPaul-Pd-DMS	Toluene	K2CO3	884	UPLC	Method2
IPr-PEPPSI	Toluene	K2CO3	884	UPLC	Method2	35
IPr*-PEPPSI	Toluene	K2CO3	884	UPLC	Method2	17
INonCl-PEPPSI	Toluene	K2CO3	884	UPLC	Method2	96
IPent-Pd-DMS	Toluene	Cs2CO3	884	UPLC	Method2	62
IHept-Pd-DMS	Toluene	Cs2CO3	884	UPLC	Method2	47
IPr*Tol-Pd-DMS	Toluene	Cs2CO3	884	UPLC	Method2	71
IHeptCl-Pd-DMS	Toluene	Cs2CO3	884	UPLC	Method2	77
IPaul-Pd-DMS	Toluene	Cs2CO3	884	UPLC	Method2
IPr-PEPPSI	Toluene	Cs2CO3	884	UPLC	Method2	95
IPr*-PEPPSI	Toluene	Cs2CO3	884	UPLC	Method2	67
INonCl-PEPPSI	Toluene	Cs2CO3	884	UPLC	Method2	97
IPent-Pd-DMS	Toluene	K3PO4	884	UPLC	Method2	16
IHept-Pd-DMS	Toluene	K3PO4	884	UPLC	Method2	19
IPr*Tol-Pd-DMS	Toluene	K3PO4	884	UPLC	Method2	40
IHeptCl-Pd-DMS	Toluene	K3PO4	884	UPLC	Method2	70
IPaul-Pd-DMS	Toluene	K3PO4	884	UPLC	Method2	32
IPr-PEPPSI	Toluene	K3PO4	884	UPLC	Method2	54
IPr*-PEPPSI	Toluene	K3PO4	884	UPLC	Method2	24
INonCl-PEPPSI	Toluene	K3PO4	884	UPLC	Method2	98
IPent-Pd-DMS	EtOH	K2CO3	883	GC	Method2
IHept-Pd-DMS	EtOH	K2CO3	883	GC	Method2	82	100
IPr*Tol-Pd-DMS	EtOH	K2CO3	883	GC	Method2	84	100
IHeptCl-Pd-DMS	EtOH	K2CO3	883	GC	Method2	83	100
IPaul-Pd-DMS	EtOH	K2CO3	883	GC	Method2	92	100
IPr-PEPPSI	EtOH	K2CO3	883	GC	Method2	92	100
IPr*-PEPPSI	EtOH	K2CO3	883	GC	Method2	80	100
INonCl-PEPPSI	EtOH	K2CO3	883	GC	Method2	83	100
IPent-Pd-DMS	EtOH	Cs2CO3	883	GC	Method2	78	99
IHept-Pd-DMS	EtOH	Cs2CO3	883	GC	Method2	73	100
IPr*Tol-Pd-DMS	EtOH	Cs2CO3	883	GC	Method2	23	57
IHeptCl-Pd-DMS	EtOH	Cs2CO3	883	GC	Method2	47	100
IPaul-Pd-DMS	EtOH	Cs2CO3	883	GC	Method2	72	89
IPr-PEPPSI	EtOH	Cs2CO3	883	GC	Method2	86	100
IPr*-PEPPSI	EtOH	Cs2CO3	883	GC	Method2	13	50
INonCl-PEPPSI	EtOH	Cs2CO3	883	GC	Method2	38	100
IPent-Pd-DMS	EtOH	K3PO4	883	GC	Method2
IHept-Pd-DMS	EtOH	K3PO4	883	GC	Method2	89	100
IPr*Tol-Pd-DMS	EtOH	K3PO4	883	GC	Method2	93	100
IHeptCl-Pd-DMS	EtOH	K3PO4	883	GC	Method2	92	100
IPaul-Pd-DMS	EtOH	K3PO4	883	GC	Method2	96	100
IPr-PEPPSI	EtOH	K3PO4	883	GC	Method2	94	100
IPr*-PEPPSI	EtOH	K3PO4	883	GC	Method2	69	100
INonCl-PEPPSI	EtOH	K3PO4	883	GC	Method2	84	100
IPent-Pd-DMS	iPrOAc	K2CO3	883	GC	Method2	88	100
IHept-Pd-DMS	iPrOAc	K2CO3	883	GC	Method2	73	89
IPr*Tol-Pd-DMS	iPrOAc	K2CO3	883	GC	Method2	34	54
IHeptCl-Pd-DMS	iPrOAc	K2CO3	883	GC	Method2	73	89
IPaul-Pd-DMS	iPrOAc	K2CO3	883	GC	Method2	66	82
IPr-PEPPSI	iPrOAc	K2CO3	883	GC	Method2	89	100
IPr*-PEPPSI	iPrOAc	K2CO3	883	GC	Method2	3	26
INonCl-PEPPSI	iPrOAc	K2CO3	883	GC	Method2	64	82
IPent-Pd-DMS	iPrOAc	Cs2CO3	883	GC	Method2	89	100
IHept-Pd-DMS	iPrOAc	Cs2CO3	883	GC	Method2	83	98
IPr*Tol-Pd-DMS	iPrOAc	Cs2CO3	883	GC	Method2	88	100
IHeptCl-Pd-DMS	iPrOAc	Cs2CO3	883	GC	Method2	61	81
IPaul-Pd-DMS	iPrOAc	Cs2CO3	883	GC	Method2	89	100
IPr-PEPPSI	iPrOAc	Cs2CO3	883	GC	Method2	89	100
IPr*-PEPPSI	iPrOAc	Cs2CO3	883	GC	Method2	59	77
INonCl-PEPPSI	iPrOAc	Cs2CO3	883	GC	Method2	87	100
IPent-Pd-DMS	iPrOAc	K3PO4	883	GC	Method2	87	100
IHept-Pd-DMS	iPrOAc	K3PO4	883	GC	Method2	39	59
IPr*Tol-Pd-DMS	iPrOAc	K3PO4	883	GC	Method2	40	57
IHeptCl-Pd-DMS	iPrOAc	K3PO4	883	GC	Method2
IPaul-Pd-DMS	iPrOAc	K3PO4	883	GC	Method2	92	100
IPr-PEPPSI	iPrOAc	K3PO4	883	GC	Method2	92	100
IPr*-PEPPSI	iPrOAc	K3PO4	883	GC	Method2	80	93
INonCl-PEPPSI	iPrOAc	K3PO4	883	GC	Method2	89	100
IPent-Pd-DMS	Me-THF	K2CO3	883	GC	Method2	56	73
IHept-Pd-DMS	Me-THF	K2CO3	883	GC	Method2	34	52
IPr*Tol-Pd-DMS	Me-THF	K2CO3	883	GC	Method2	27	45
IHeptCl-Pd-DMS	Me-THF	K2CO3	883	GC	Method2	50	67
IPaul-Pd-DMS	Me-THF	K2CO3	883	GC	Method2
IPr-PEPPSI	Me-THF	K2CO3	883	GC	Method2	20	39
IPr*-PEPPSI	Me-THF	K2CO3	883	GC	Method2	3	22
INonCl-PEPPSI	Me-THF	K2CO3	883	GC	Method2	33	51
IPent-Pd-DMS	Me-THF	Cs2CO3	883	GC	Method2	88	99
IHept-Pd-DMS	Me-THF	Cs2CO3	883	GC	Method2	82	96
IPr*Tol-Pd-DMS	Me-THF	Cs2CO3	883	GC	Method2	90	100
IHeptCl-Pd-DMS	Me-THF	Cs2CO3	883	GC	Method2	78	93
IPaul-Pd-DMS	Me-THF	Cs2CO3	883	GC	Method2	83	96
IPr-PEPPSI	Me-THF	Cs2CO3	883	GC	Method2	88	100
IPr*-PEPPSI	Me-THF	Cs2CO3	883	GC	Method2	30	50
INonCl-PEPPSI	Me-THF	Cs2CO3	883	GC	Method2	87	100
IPent-Pd-DMS	Me-THF	K3PO4	883	GC	Method2
IHept-Pd-DMS	Me-THF	K3PO4	883	GC	Method2	61	77
IPr*Tol-Pd-DMS	Me-THF	K3PO4	883	GC	Method2	91	100
IHeptCl-Pd-DMS	Me-THF	K3PO4	883	GC	Method2	89	100
IPaul-Pd-DMS	Me-THF	K3PO4	883	GC	Method2	92	100
IPr-PEPPSI	Me-THF	K3PO4	883	GC	Method2	91	100
IPr*-PEPPSI	Me-THF	K3PO4	883	GC	Method2	50	62
INonCl-PEPPSI	Me-THF	K3PO4	883	GC	Method2	89	100
IPent-Pd-DMS	Toluene	K2CO3	883	GC	Method2	70	78
IHept-Pd-DMS	Toluene	K2CO3	883	GC	Method2	57	70
IPr*Tol-Pd-DMS	Toluene	K2CO3	883	GC	Method2	36	52
IHeptCl-Pd-DMS	Toluene	K2CO3	883	GC	Method2	70	82
IPaul-Pd-DMS	Toluene	K2CO3	883	GC	Method2	7	21
IPr-PEPPSI	Toluene	K2CO3	883	GC	Method2	16	28
IPr*-PEPPSI	Toluene	K2CO3	883	GC	Method2	13	28
INonCl-PEPPSI	Toluene	K2CO3	883	GC	Method2	96	100
IPent-Pd-DMS	Toluene	Cs2CO3	883	GC	Method2	61	71
IHept-Pd-DMS	Toluene	Cs2CO3	883	GC	Method2	44	59
IPr*Tol-Pd-DMS	Toluene	Cs2CO3	883	GC	Method2	80	87
IHeptCl-Pd-DMS	Toluene	Cs2CO3	883	GC	Method2	74	84
IPaul-Pd-DMS	Toluene	Cs2CO3	883	GC	Method2	36	51
IPr-PEPPSI	Toluene	Cs2CO3	883	GC	Method2	82	93
IPr*-PEPPSI	Toluene	Cs2CO3	883	GC	Method2	67	75
INonCl-PEPPSI	Toluene	Cs2CO3	883	GC	Method2	93	100
IPent-Pd-DMS	Toluene	K3PO4	883	GC	Method2	21	32
IHept-Pd-DMS	Toluene	K3PO4	883	GC	Method2	13	27
IPr*Tol-Pd-DMS	Toluene	K3PO4	883	GC	Method2	35	50
IHeptCl-Pd-DMS	Toluene	K3PO4	883	GC	Method2	65	74
IPaul-Pd-DMS	Toluene	K3PO4	883	GC	Method2	24	32
IPr-PEPPSI	Toluene	K3PO4	883	GC	Method2	52	63
IPr*-PEPPSI	Toluene	K3PO4	883	GC	Method2	23	36
INonCl-PEPPSI	Toluene	K3PO4	883	GC	Method2	91	98
IPent-Pd-DMS	EtOH	K2CO3	884	GC	Method2	95	100
IHept-Pd-DMS	EtOH	K2CO3	884	GC	Method2	73	100
IPr*Tol-Pd-DMS	EtOH	K2CO3	884	GC	Method2	85	100
IHeptCl-Pd-DMS	EtOH	K2CO3	884	GC	Method2	85	100
IPaul-Pd-DMS	EtOH	K2CO3	884	GC	Method2	94	100
IPr-PEPPSI	EtOH	K2CO3	884	GC	Method2	48	100
IPr*-PEPPSI	EtOH	K2CO3	884	GC	Method2	83	100
INonCl-PEPPSI	EtOH	K2CO3	884	GC	Method2	87	100
IPent-Pd-DMS	EtOH	Cs2CO3	884	GC	Method2	76	100
IHept-Pd-DMS	EtOH	Cs2CO3	884	GC	Method2	74	100
IPr*Tol-Pd-DMS	EtOH	Cs2CO3	884	GC	Method2	26	57
IHeptCl-Pd-DMS	EtOH	Cs2CO3	884	GC	Method2	45	100
IPaul-Pd-DMS	EtOH	Cs2CO3	884	GC	Method2	85	97
IPr-PEPPSI	EtOH	Cs2CO3	884	GC	Method2	45	100
IPr*-PEPPSI	EtOH	Cs2CO3	884	GC	Method2	16	54
INonCl-PEPPSI	EtOH	Cs2CO3	884	GC	Method2	38	100
IPent-Pd-DMS	EtOH	K3PO4	884	GC	Method2	80	94
IHept-Pd-DMS	EtOH	K3PO4	884	GC	Method2	83	95
IPr*Tol-Pd-DMS	EtOH	K3PO4	884	GC	Method2	78	100
IHeptCl-Pd-DMS	EtOH	K3PO4	884	GC	Method2	89	100
IPaul-Pd-DMS	EtOH	K3PO4	884	GC	Method2	95	100
IPr-PEPPSI	EtOH	K3PO4	884	GC	Method2	47	100
IPr*-PEPPSI	EtOH	K3PO4	884	GC	Method2	78	100
INonCl-PEPPSI	EtOH	K3PO4	884	GC	Method2
IPent-Pd-DMS	iPrOAc	K2CO3	884	GC	Method2	89	100
IHept-Pd-DMS	iPrOAc	K2CO3	884	GC	Method2	61	78
IPr*Tol-Pd-DMS	iPrOAc	K2CO3	884	GC	Method2	74	87
IHeptCl-Pd-DMS	iPrOAc	K2CO3	884	GC	Method2	66	81
IPaul-Pd-DMS	iPrOAc	K2CO3	884	GC	Method2	35	55
IPr-PEPPSI	iPrOAc	K2CO3	884	GC	Method2	46	100
IPr*-PEPPSI	iPrOAc	K2CO3	884	GC	Method2	6	29
INonCl-PEPPSI	iPrOAc	K2CO3	884	GC	Method2
IPent-Pd-DMS	iPrOAc	Cs2CO3	884	GC	Method2	90	100
IHept-Pd-DMS	iPrOAc	Cs2CO3	884	GC	Method2	84	98
IPr*Tol-Pd-DMS	iPrOAc	Cs2CO3	884	GC	Method2	91	100
IHeptCl-Pd-DMS	iPrOAc	Cs2CO3	884	GC	Method2	88	100
IPaul-Pd-DMS	iPrOAc	Cs2CO3	884	GC	Method2	92	100
IPr-PEPPSI	iPrOAc	Cs2CO3	884	GC	Method2	46	100
IPr*-PEPPSI	iPrOAc	Cs2CO3	884	GC	Method2	65	79
INonCl-PEPPSI	iPrOAc	Cs2CO3	884	GC	Method2	91	100
IPent-Pd-DMS	iPrOAc	K3PO4	884	GC	Method2	89	100
IHept-Pd-DMS	iPrOAc	K3PO4	884	GC	Method2	43	62
IPr*Tol-Pd-DMS	iPrOAc	K3PO4	884	GC	Method2	92	100
IHeptCl-Pd-DMS	iPrOAc	K3PO4	884	GC	Method2
IPaul-Pd-DMS	iPrOAc	K3PO4	884	GC	Method2	93	100
IPr-PEPPSI	iPrOAc	K3PO4	884	GC	Method2	41	100
IPr*-PEPPSI	iPrOAc	K3PO4	884	GC	Method2	86	97
INonCl-PEPPSI	iPrOAc	K3PO4	884	GC	Method2	90	100
IPent-Pd-DMS	Me-THF	K2CO3	884	GC	Method2	29	48
IHept-Pd-DMS	Me-THF	K2CO3	884	GC	Method2	33	48
IPr*Tol-Pd-DMS	Me-THF	K2CO3	884	GC	Method2	27	43
IHeptCl-Pd-DMS	Me-THF	K2CO3	884	GC	Method2	25	46
IPaul-Pd-DMS	Me-THF	K2CO3	884	GC	Method2	34	100
IPr-PEPPSI	Me-THF	K2CO3	884	GC	Method2	12	71
IPr*-PEPPSI	Me-THF	K2CO3	884	GC	Method2	4	21
INonCl-PEPPSI	Me-THF	K2CO3	884	GC	Method2	30	47
IPent-Pd-DMS	Me-THF	Cs2CO3	884	GC	Method2
IHept-Pd-DMS	Me-THF	Cs2CO3	884	GC	Method2	81	94
IPr*Tol-Pd-DMS	Me-THF	Cs2CO3	884	GC	Method2	92	100
IHeptCl-Pd-DMS	Me-THF	Cs2CO3	884	GC	Method2	81	100
IPaul-Pd-DMS	Me-THF	Cs2CO3	884	GC	Method2	91	100
IPr-PEPPSI	Me-THF	Cs2CO3	884	GC	Method2	39	95
IPr*-PEPPSI	Me-THF	Cs2CO3	884	GC	Method2	26	48
INonCl-PEPPSI	Me-THF	Cs2CO3	884	GC	Method2	90	100
IPent-Pd-DMS	Me-THF	K3PO4	884	GC	Method2
IHept-Pd-DMS	Me-THF	K3PO4	884	GC	Method2	32	50
IPr*Tol-Pd-DMS	Me-THF	K3PO4	884	GC	Method2	91	100
IHeptCl-Pd-DMS	Me-THF	K3PO4	884	GC	Method2	89	100
IPaul-Pd-DMS	Me-THF	K3PO4	884	GC	Method2	94	100
IPr-PEPPSI	Me-THF	K3PO4	884	GC	Method2	46	100
IPr*-PEPPSI	Me-THF	K3PO4	884	GC	Method2	53	64
INonCl-PEPPSI	Me-THF	K3PO4	884	GC	Method2
IPent-Pd-DMS	Toluene	K2CO3	884	GC	Method2	42	61
IHept-Pd-DMS	Toluene	K2CO3	884	GC	Method2	48	61
IPr*Tol-Pd-DMS	Toluene	K2CO3	884	GC	Method2	37	48
IHeptCl-Pd-DMS	Toluene	K2CO3	884	GC	Method2	68	75
IPaul-Pd-DMS	Toluene	K2CO3	884	GC	Method2	8	23
IPr-PEPPSI	Toluene	K2CO3	884	GC	Method2	16	76
IPr*-PEPPSI	Toluene	K2CO3	884	GC	Method2	15	27
INonCl-PEPPSI	Toluene	K2CO3	884	GC	Method2	100	100
IPent-Pd-DMS	Toluene	Cs2CO3	884	GC	Method2	64	69
IHept-Pd-DMS	Toluene	Cs2CO3	884	GC	Method2	47	64
IPr*Tol-Pd-DMS	Toluene	Cs2CO3	884	GC	Method2	74	76
IHeptCl-Pd-DMS	Toluene	Cs2CO3	884	GC	Method2	80	94
IPaul-Pd-DMS	Toluene	Cs2CO3	884	GC	Method2	43	45
IPr-PEPPSI	Toluene	Cs2CO3	884	GC	Method2	33	100
IPr*-PEPPSI	Toluene	Cs2CO3	884	GC	Method2	69	74
INonCl-PEPPSI	Toluene	Cs2CO3	884	GC	Method2	100	100
IPent-Pd-DMS	Toluene	K3PO4	884	GC	Method2	14	24
IHept-Pd-DMS	Toluene	K3PO4	884	GC	Method2	17	26
IPr*Tol-Pd-DMS	Toluene	K3PO4	884	GC	Method2	41	49
IHeptCl-Pd-DMS	Toluene	K3PO4	884	GC	Method2	72	77
IPaul-Pd-DMS	Toluene	K3PO4	884	GC	Method2	24	28
IPr-PEPPSI	Toluene	K3PO4	884	GC	Method2	26	80
IPr*-PEPPSI	Toluene	K3PO4	884	GC	Method2	25	33
INonCl-PEPPSI	Toluene	K3PO4	884	GC	Method2	100	100
IMes-Pd-DMS	Me-THF	Cs2CO3	890_1	GC	Method2	38	51
IHeptCl-Pd-DMS	iPrOAc	K3PO4	890_1	GC	Method2	89	100
IHeptCl-Pd-DMS	iPrOAc	Cs2CO3	890_1	GC	Method2	90	100
IPent-Pd-DMS	Me-THF	Cs2CO3	890_1	GC	Method2	91	100
IPr#-Pd-DMS	Me-THF	Cs2CO3	890_1	GC	Method2	86	100
IHeptCl-Pd-DMS	Me-THF	K2CO3	890_1	GC	Method2	27	42
IMes-Pd-DMS	iPrOAc	K3PO4	890_1	GC	Method2	62	77
IMes-Pd-DMS	iPrOAc	Cs2CO3	890_1	GC	Method2	69	83
IMes-Pd-DMS	EtOH	Cs2CO3	890_1	GC	Method2	44	59
INonCl-Pd-DMS	Toluene	K3PO4	890_1	GC	Method2	92	100
INonCl-Pd-DMS	Toluene	Cs2CO3	890_1	GC	Method2	92	100
IPaul-Pd-DMS	Me-THF	K2CO3	890_1	GC	Method2	32	46
IPent-Pd-DMS	Me-THF	K2CO3	890_1	GC	Method2	30	46
IPaul-Pd-DMS	iPrOAc	K2CO3	890_1	GC	Method2	49	63
IPentCl-Pd-DMS	Toluene	K3PO4	890_1	GC	Method2	88	99
IPent-Pd-DMS	Toluene	K2CO3	890_1	GC	Method2	15	22
IHept-Pd-DMS	Me-THF	K3PO4	890_1	GC	Method2	92	100
IMes-Pd-DMS	Me-THF	K3PO4	890_1	GC	Method2	76	86
INonCl-Pd-DMS	Me-THF	K3PO4	890_1	GC	Method2	90	100
IPent-Pd-DMS	EtOH	K3PO4	890_1	GC	Method2	87	96
IPent-Pd-DMS	EtOH	K2CO3	890_1	GC	Method2	93	100
IPent-Pd-DMS	Me-THF	K3PO4	890_1	GC	Method2	90	100
IPr#-Pd-DMS	iPrOAc	Cs2CO3	890_1	GC	Method2	88	100
IPr*OMe-Pd-DMS	Toluene	K3PO4	890_1	GC	Method2	76	89
IPr*OMe-Pd-DMS	Toluene	Cs2CO3	890_1	GC	Method2	89	100
IPr*OMe-Pd-DMS	Me-THF	K3PO4	890_1	GC	Method2	87	100
IPr*OMe-Pd-DMS	iPrOAc	K3PO4	890_1	GC	Method2	88	100
IPr*OMe-Pd-DMS	iPrOAc	Cs2CO3	890_1	GC	Method2	86	100
IPr*-Pd-DMS	Toluene	K3PO4	890_1	GC	Method2	86	97
IPr*-Pd-DMS	Toluene	Cs2CO3	890_1	GC	Method2	90	100
IPr*-Pd-DMS	Me-THF	K3PO4	890_1	GC	Method2	89	100
IPr*-Pd-DMS	iPrOAc	K3PO4	890_1	GC	Method2	88	100
IPr*-Pd-DMS	iPrOAc	Cs2CO3	890_1	GC	Method2	88	100
IPr*Tol-Pd-DMS	iPrOAc	K3PO4	890_1	GC	Method2	91	100
IPr*Tol-Pd-DMS	iPrOAc	K2CO3	890_1	GC	Method2	21	36
IPriPr-Pd-DMS	Toluene	Cs2CO3	890_1	GC	Method2	67	80
IPriPr-Pd-DMS	iPrOAc	K3PO4	890_1	GC	Method2	87	99
IPr-Pd-DMS	Toluene	Cs2CO3	890_1	GC	Method2	65	79
IPr-Pd-DMS	Me-THF	K3PO4	890_1	GC	Method2	90	100
IPr-Pd-DMS	iPrOAc	K3PO4	890_1	GC	Method2	82	100
IPr-Pd-DMS	iPrOAc	K2CO3	890_1	GC	Method2	24	40
IPr-Pd-DMS	EtOH	K3PO4	890_1	GC	Method2	96	100
IPr-Pd-DMS	EtOH	K2CO3	890_1	GC	Method2	92	100
SIPr-Pd-DMS	Toluene	Cs2CO3	890_1	GC	Method2	56	69
SIPr-Pd-DMS	iPrOAc	K3PO4	890_1	GC	Method2	86	100
SIPr-Pd-DMS	EtOH	K2CO3	890_1	GC	Method2	88	100
IMes-Pd-DMS	Me-THF	Cs2CO3	890_2	GC	Method2	38	51
IHeptCl-Pd-DMS	iPrOAc	K3PO4	890_2	GC	Method2	88	100
IHeptCl-Pd-DMS	iPrOAc	Cs2CO3	890_2	GC	Method2	90	100
IPent-Pd-DMS	Me-THF	Cs2CO3	890_2	GC	Method2	91	100
IPr#-Pd-DMS	Me-THF	Cs2CO3	890_2	GC	Method2	32	46
IHeptCl-Pd-DMS	Me-THF	K2CO3	890_2	GC	Method2	28	40
IMes-Pd-DMS	iPrOAc	K3PO4	890_2	GC	Method2	50	65
IMes-Pd-DMS	iPrOAc	Cs2CO3	890_2	GC	Method2	70	84
IMes-Pd-DMS	EtOH	Cs2CO3	890_2	GC	Method2	41	55
INonCl-Pd-DMS	Toluene	K3PO4	890_2	GC	Method2	92	100
INonCl-Pd-DMS	Toluene	Cs2CO3	890_2	GC	Method2	91	100
IPaul-Pd-DMS	Me-THF	K2CO3	890_2	GC	Method2	35	49
IPent-Pd-DMS	Me-THF	K2CO3	890_2	GC	Method2	29	44
IPaul-Pd-DMS	iPrOAc	K2CO3	890_2	GC	Method2	50	66
IPentCl-Pd-DMS	Toluene	K3PO4	890_2	GC	Method2	83	93
IPent-Pd-DMS	Toluene	K2CO3	890_2	GC	Method2	15	24
IHept-Pd-DMS	Me-THF	K3PO4	890_2	GC	Method2	80	94
IMes-Pd-DMS	Me-THF	K3PO4	890_2	GC	Method2	75	86
INonCl-Pd-DMS	Me-THF	K3PO4	890_2	GC	Method2	91	100
IPent-Pd-DMS	EtOH	K3PO4	890_2	GC	Method2	83	94
IPent-Pd-DMS	EtOH	K2CO3	890_2	GC	Method2	90	100
IPent-Pd-DMS	Me-THF	K3PO4	890_2	GC	Method2	92	100
IPr#-Pd-DMS	iPrOAc	Cs2CO3	890_2	GC	Method2	89	100
IPr*OMe-Pd-DMS	Toluene	K3PO4	890_2	GC	Method2	83	95
IPr*OMe-Pd-DMS	Toluene	Cs2CO3	890_2	GC	Method2	90	100
IPr*OMe-Pd-DMS	Me-THF	K3PO4	890_2	GC	Method2	88	100
IPr*OMe-Pd-DMS	iPrOAc	K3PO4	890_2	GC	Method2	90	100
IPr*OMe-Pd-DMS	iPrOAc	Cs2CO3	890_2	GC	Method2	88	100
IPr*-Pd-DMS	Toluene	K3PO4	890_2	GC	Method2	85	97
IPr*-Pd-DMS	Toluene	Cs2CO3	890_2	GC	Method2	90	100
IPr*-Pd-DMS	Me-THF	K3PO4	890_2	GC	Method2	89	100
IPr*-Pd-DMS	iPrOAc	K3PO4	890_2	GC	Method2	89	100
IPr*-Pd-DMS	iPrOAc	Cs2CO3	890_2	GC	Method2	88	100
IPr*Tol-Pd-DMS	iPrOAc	K3PO4	890_2	GC	Method2	89	100
IPr*Tol-Pd-DMS	iPrOAc	K2CO3	890_2	GC	Method2	20	35
IPriPr-Pd-DMS	Toluene	Cs2CO3	890_2	GC	Method2	90	100
IPriPr-Pd-DMS	iPrOAc	K3PO4	890_2	GC	Method2	87	100
IPr-Pd-DMS	Toluene	Cs2CO3	890_2	GC	Method2	92	100
IPr-Pd-DMS	Me-THF	K3PO4	890_2	GC	Method2	90	100
IPr-Pd-DMS	iPrOAc	K3PO4	890_2	GC	Method2	87	100
IPr-Pd-DMS	iPrOAc	K2CO3	890_2	GC	Method2	23	40
IPr-Pd-DMS	EtOH	K3PO4	890_2	GC	Method2	93	100
IPr-Pd-DMS	EtOH	K2CO3	890_2	GC	Method2	87	100
SIPr-Pd-DMS	Toluene	Cs2CO3	890_2	GC	Method2	90	100
SIPr-Pd-DMS	iPrOAc	K3PO4	890_2	GC	Method2	88	100
SIPr-Pd-DMS	EtOH	K2CO3	890_2	GC	Method2	89	100
IPent-Pd-DMS	EtOH	K2CO3	891_1	GC	Method2	83	100
IHept-Pd-DMS	EtOH	K2CO3	891_1	GC	Method2	86	100
IPr*Tol-Pd-DMS	EtOH	K2CO3	891_1	GC	Method2	63	100
IHeptCl-Pd-DMS	EtOH	K2CO3	891_1	GC	Method2	81	100
IPaul-Pd-DMS	EtOH	K2CO3	891_1	GC	Method2	89	100
IPent-Pd-DMS	iPrOAc	K2CO3	891_1	GC	Method2	33	49
IHept-Pd-DMS	iPrOAc	K2CO3	891_1	GC	Method2	18	35
IPr*Tol-Pd-DMS	iPrOAc	K2CO3	891_1	GC	Method2	20	36
IHeptCl-Pd-DMS	iPrOAc	K2CO3	891_1	GC	Method2	23	38
IPaul-Pd-DMS	iPrOAc	K2CO3	891_1	GC	Method2	48	64
IPent-Pd-DMS	Me-THF	K2CO3	891_1	GC	Method2	30	44
IHept-Pd-DMS	Me-THF	K2CO3	891_1	GC	Method2	20	36
IPr*Tol-Pd-DMS	Me-THF	K2CO3	891_1	GC	Method2	22	35
IHeptCl-Pd-DMS	Me-THF	K2CO3	891_1	GC	Method2	28	41
IPaul-Pd-DMS	Me-THF	K2CO3	891_1	GC	Method2	33	49
IPent-Pd-DMS	Toluene	K2CO3	891_1	GC	Method2	15	23
IHept-Pd-DMS	Toluene	K2CO3	891_1	GC	Method2	11	25
IPr*Tol-Pd-DMS	Toluene	K2CO3	891_1	GC	Method2	13	25
IHeptCl-Pd-DMS	Toluene	K2CO3	891_1	GC	Method2	28	38
IPaul-Pd-DMS	Toluene	K2CO3	891_1	GC	Method2	9	20
IPent-Pd-DMS	EtOH	K2CO3	891_2	GC	Method2	72	100
IHept-Pd-DMS	EtOH	K2CO3	891_2	GC	Method2	89	100
IPr*Tol-Pd-DMS	EtOH	K2CO3	891_2	GC	Method2	64	100
IHeptCl-Pd-DMS	EtOH	K2CO3	891_2	GC	Method2	84	100
IPaul-Pd-DMS	EtOH	K2CO3	891_2	GC	Method2	90	100
IPent-Pd-DMS	iPrOAc	K2CO3	891_2	GC	Method2	44	61
IHept-Pd-DMS	iPrOAc	K2CO3	891_2	GC	Method2	26	43
IPr*Tol-Pd-DMS	iPrOAc	K2CO3	891_2	GC	Method2	22	39
IHeptCl-Pd-DMS	iPrOAc	K2CO3	891_2	GC	Method2	24	41
IPaul-Pd-DMS	iPrOAc	K2CO3	891_2	GC	Method2	39	55
IPent-Pd-DMS	Me-THF	K2CO3	891_2	GC	Method2	32	48
IHept-Pd-DMS	Me-THF	K2CO3	891_2	GC	Method2	22	39
IPr*Tol-Pd-DMS	Me-THF	K2CO3	891_2	GC	Method2	21	36
IHeptCl-Pd-DMS	Me-THF	K2CO3	891_2	GC	Method2	28	43
IPaul-Pd-DMS	Me-THF	K2CO3	891_2	GC	Method2	28	44
IPent-Pd-DMS	Toluene	K2CO3	891_2	GC	Method2	21	36
IHept-Pd-DMS	Toluene	K2CO3	891_2	GC	Method2	3	18
IPr*Tol-Pd-DMS	Toluene	K2CO3	891_2	GC	Method2	17	29
IHeptCl-Pd-DMS	Toluene	K2CO3	891_2	GC	Method2	28	42
IPaul-Pd-DMS	Toluene	K2CO3	891_2	GC	Method2	7	18
